RESEARCH ARTICLE

# Exploring public genomics data for population pharmacogenomics

Kleanthi Lakiotaki<sup>1</sup>, Alexandros Kanterakis<sup>1</sup>, Evgenia Kartsaki<sup>1</sup>, Theodora Katsila<sup>2</sup>, George P. Patrinos<sup>2,3\*</sup>, George Potamias<sup>1</sup>

**1** Institute of Computer Science, Foundation for Research and Technology, Heraklion, Crete, Greece,

**2** Department of Pharmacy, School of Health Sciences, University of Patras, Rio, Patras, Greece,

**3** Department of Pathology, College of Medicine and Health Sciences, United Arab Emirates University, Al-Ain, UAE

\* [gpatrinos@upatras.gr](mailto:gpatrinos@upatras.gr)

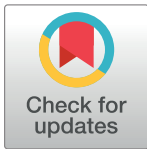

## Abstract

Racial and ethnic differences in drug responses are now well studied and documented. Pharmacogenomics research seeks to unravel the genetic underpinnings of inter-individual variability with the aim of tailored-made theranostics and therapeutics. Taking into account the differential expression of pharmacogenes coding for key metabolic enzymes and transporters that affect drug pharmacokinetics and pharmacodynamics, we advise that data interpretation and analysis need to occur in light of geographical ancestry, if implications for drug development and global health are to be considered. Herein, we exploit ePGA, a web-based electronic Pharmacogenomics Assistant and publicly available genetic data from the 1000 Genomes Project to explore genotype to phenotype associations among the 1000 Genomes Project populations.

## OPEN ACCESS

**Citation:** Lakiotaki K, Kanterakis A, Kartsaki E, Katsila T, Patrinos GP, Potamias G (2017) Exploring public genomics data for population pharmacogenomics. PLoS ONE 12(8): e0182138. <https://doi.org/10.1371/journal.pone.0182138>

**Editor:** Alvaro Galli, CNR, ITALY

**Received:** April 12, 2017

**Accepted:** July 12, 2017

**Published:** August 3, 2017

**Copyright:** © 2017 Lakiotaki et al. This is an open access article distributed under the terms of the [Creative Commons Attribution License](https://creativecommons.org/licenses/by/4.0/), which permits unrestricted use, distribution, and reproduction in any medium, provided the original author and source are credited.

**Data Availability Statement:** All relevant data are within the paper and its Supporting Information files. Also, data are uploaded to Figshare ([https://figshare.com/articles/Supporting\\_information\\_xlsx/513505](https://figshare.com/articles/Supporting_information_xlsx/513505)).

**Funding:** Part of this work was funded by grants from the European Commission [FP7-305444 (RD-Connect); H2020-668353 (U-PGx)] and the OPCE II; Greek-EU operational program (11ΣΥΝ\_10\_145; eMoDiA) to GPP.

**Competing interests:** The authors have declared that no competing interests exist.

## Introduction

Several studies have demonstrated the genetic underpinnings of inter-individual variability in drug response [1–3], among which the Veterans Administration Cooperative Study implied a key role for pharmacogenomics and geographical ancestry on the basis of the variable drug responses observed, when propranolol and hydrochlorothiazide were administered to African-Americans and Caucasians [4]. Similarly, the administration of BiDil, a drug to treat African-American patients with heart failure has been subject to considerable criticism, when clinical trials showed strong evidence of extreme effectiveness in self-identified African-American patients and at the same time, considerable evidence that the effects were far smaller, if present at all, in Caucasian patients [5]. In a recent publication in the New England Journal of Medicine, Vence and coworkers accurately stated that although self-identified race may correlate with geographical ancestry, it does not predict an individual patient's genotype or drug response and thus, prescribing medications on the basis of race oversimplifies the complexities and interplay of ancestry and drug response [6].

Thus, population based-studies are needed to infer rates and risks for drug inefficacy and/or adverse drug reactions (ADRs) and guide the implementation of pharmacogenomic testing.

Indeed, several studies report an extensive variability in genetic variants and gene expression relationships associated with pharmacogenes in humans, when ethnic and/ or racial groups are considered [7–10]. Approximately one-fifth of new drugs approved in the past six years demonstrated differences in exposure and/ or response across racial/ethnic groups, leading to population-specific prescribing recommendations. Ramamoorthy and coworkers reviewed several such cases [11].

Genomic variation describes naturally occurring differences among individuals of the same species resulting from non-random mating, genetic drift, physical distribution, or migration. Genomic variation is typically discovered by sequencing individual genomes and comparing reads to a reference human genome (<http://www.ncbi.nlm.nih.gov/projects/genome/assembly/grc/human/>). More than 80 million variant sites in the human genome have been discovered so far, as registered and curated by the Genetic Variation Program (<http://www.genome.gov/10001551>). These variant sites include single nucleotide polymorphisms (SNPs), insertions and deletions (indels) as well as other structural variants. In total, the genetic architecture of quantitative traits and/ or genotype to phenotype correlations, meaning whether numerous rare variants of large effect or common variants of very small effect account for human genome variation is still arguable [12].

Paving the way to Pharmacogenomics (PGx)-guided decision-making in the clinic, current findings indicate that pharmacogenes are of fundamental importance when drug responses need to be predicted [13–15]. Genomic variants in drug-metabolizing enzymes and transporters have been linked to inter-individual differences in the efficacy and toxicity of many medications [16] and thus, PGx studies empower drug discovery and tailored-made theranostics [17]. Moreover, next generation sequencing (NGS) has created unprecedented opportunities towards the analysis of whole genomes by obtaining a full picture of one's variome [18,19]. Inter-ethnic differences in allele frequencies of genes encoding for proteins involved in drug absorption, distribution, metabolism, excretion and toxicity (ADMET) have been reported in several studies.

Considering that drug-metabolizing profiles, defined by the distribution of drug metabolizing enzyme variants, differ significantly among genetically inferred clusters, “. . . *it is not only feasible but a clinical priority to assess genetic structure as a routine part of drug evaluation.* . . .” [20]. FDA strongly advises that PGx assessment in early-phase clinical studies is necessary [21], pinpointing that most early-phase clinical trials in a setup of limited ethnic diversity. Herein, we exploit ePGA, a web-based electronic Pharmacogenomics Assistant and publicly available genetic data from the 1000 Genomes Project to explore genotype to phenotype associations among the 1000 Genomes Project populations with the aim to support decision-making for drug development and global health.

## Towards Population Pharmacogenomics (PPGx)

According to Priority Medicines for Europe and the World 2013 report ([http://www.who.int/medicines/areas/priority\\_medicines/en/](http://www.who.int/medicines/areas/priority_medicines/en/)), the term ‘stratified medicine’, might be more accurate than the term “personalized medicine”, or its newer term “precision medicine”—the delivery of “the right drug to the right patient” and the minimization of ADRs, the current focus being the biomarker-based stratification of patient populations. Besides the race to discover PGx biomarkers over the last years, a common note in the PGx community is the lack of implementation of the PGx knowledge into routine clinical practice under an individualized framework [22]. Among the several obstacles that hold up the translation of PGx knowledge into improved health, “*the lack of prospective genotype-directed pharmacogenomic randomized clinical trials validating treatment algorithms*” as mentioned in the Pharmacogenomics

Research Network (PGRN) Translational Pharmacogenetics Program is of fundamental importance to us [23].

Although the stratified randomization of clinical trials (RCT) based on genotypes raises ethical, legal, and practical concerns, it remains a promising approach to transform current clinical trials and enable clinical pharmacogenomics. Pereira and coworkers [24] discuss the rationale for genotype-based RCT in cardiovascular disease showing that by identifying population groups that are likely to be more susceptible to a potential ADR, drug development companies can eliminate the huge cost and length of clinical trials. Following such a population-based PGx approach, genomic variation that relates to ADR risks may be identified, turning information growth to knowledge growth (translational research, drug development, clinical applications, patient awareness and education) [25,26].

A common example of genetic diversity in drug response among populations comes from tamoxifen, a drug that is used to treat breast cancer patients. Tamoxifen's pharmacological activity depends on CYP2D6 enzyme function. About 6–10% of Europeans are poor CYP2D6 metabolizers (PM) compared to <1% of East Asians [27]. In this context, Li and coworkers reported that many ADMET genes are highly differentiated across continental regions and found numerous signals of recent positive selection [28].

In this work, we show how current PGx discoveries, as deposited in state-of-the-art knowledge bases (e.g., PharmGKB), can be translated into findings which, not only enhance the underlying drug development pipelines, but also facilitate the identification of population differences in drug response/toxicity events. For this, we investigated inter-individual and population-based differences in the allele frequencies of known pharmacogenes in the 1000 Genomes Project Phase III (1kG-p3) dataset, consisting of 2,504 individuals from 26 different populations and 5 ancestral groups. We focused on inter-individual differences at the group (population or ancestral) or molecular level (genotype or haplotype) and identified those ADMET genes that show greater phenotypic variation among different populations.

## Materials and methods

### Study populations

A total of 2,504 individuals from 26 populations with ancestry from different parts of the world (5 ancestral groups) were included in this study. Their genotypes were extracted from the VCF files of Phase 3 variant calls of the 1000 Genomes Project (<http://www.1000genomes.org/>) sample collection (1kG-p3). Details on the population data can be found in [29].

### Pharmacogenomics database

PharmGKB [30] was established in 2000 as one of the first 'post-genomic' databases for the description, storage and curation of genotype and phenotype data from PGx studies. PharmGKB in alliance with CPIC (Clinical Pharmacogenetics Implementation Consortium) [31] and PGRN (PharmacoGenomics Research Network; [pgrn.org](http://pgrn.org)) [32] presents the most comprehensive resource on pharmacogenes (PGx genes), their variations, the pharmacokinetic and pharmacodynamic pathways of interest as well as their effects on drug-related phenotypes, while it freely offers PGx clinical annotations and drug dosing guidelines. Furthermore, PharmGKB provides haplotype information for a list of genes. The term "haplotype" refers to a cluster of allelic variants (SNPs, insertions, deletions, etc.) that are co-inherited because of their complete or strong linkage disequilibrium coupled to their chromosomal proximity to one another. PharmGKB does not define haplotypes. Instead, PharmGKB collects and curates information on haplotype definitions for specific genes from different sources, such as the haplotypes that define cytochrome P450 (CYP) alleles, which are derived from the

“The Human Cytochrome P450 (CYP) Allele Nomenclature Database” [33]. Currently, The Human Cytochrome P450 (CYP) Allele Nomenclature Database user can have access to the nomenclature for the polymorphic alleles of 29 CYP enzymes. *CYP2B6*, *CYP2C9*, *CYP2C19* and *CYP2D6* genes are the most polymorphic, all with a high number of functionally different alleles [34].

In the case of no centralized resources or an entity responsible for reconciling haplotypes, PharmGKB attempts to collect gene haplotype information from relevant published studies (with links to the respective PMIDs). If a study does not provide a name for a haplotype, PharmGKB uses sequential numbering to provide each haplotype with a name in order to distinguish amongst the different gene haplotypes (see: [https://www.pharmgkb.org/page/faqs#—What is a PharmGKB haplotype?](https://www.pharmgkb.org/page/faqs#—What%20is%20a%20PharmGKB%20haplotype?)).

As of April 2015, we downloaded the so-called PharmGKB “translation tables” with haplotype data for 69 PGx genes that engage 727 different variants, noted as “PGx variants” hereafter, involved in 764 haplotypes. PharmGKB considers the first haplotype listed in each table as the reference, namely the “wild-type” haplotype for that set. More details on those translation tables and their underlying processing for their use in genotype to phenotype translations are found in [35].

## ePGA

ePGA [35] is a web-based electronic Pharmacogenomics Assistant (<https://www.epga.gr/>) that provides personalized genotype-to-phenotype translation, linked to state-of-the-art clinical guidelines. ePGA’s translation service matches individual genotype profiles with PGx gene haplotypes and infers the corresponding diplotype and phenotype profiles, accompanied with summary statistics. ePGA offers two main services: “Explore” and “Translate”. The ePGA explore service is a user-friendly browser to PGx gene-variation-drug-metabolizing status associations and links to corresponding dosing guidelines and/or clinical annotations. The ePGA translation service matches individual genotype profiles with PGx gene haplotypes to infer the corresponding diplotype and phenotype profiles, accompanied with respective summary statistics. As a result, we leveraged ePGA’s services to develop exploratory methods and visualization tools to easily and efficiently explore current PGx findings in publicly available genetic data.

## Results and discussion

### Pharmacogenomics variant analysis among populations

To eliminate any inconsistencies arising from the use of different human genome references, we analyzed the PGx variants of interest on the basis of their rs ID that matched both the reference and variant alleles as noted in PharmGKB and Ensembl. We always consider the allele designated in PharmGKB tables as the variant allele. We also used Ensembl’s BioMart [36], accessed with the BioMart R package [37] that uses the most recent GRh38 human genome assembly release (housed by GRC/ Genome reference Consortium).

We only found 501 PharmGKB variants (out of the 727, as of April 2015) in the 1kG-p3 dataset shared across 26 populations. These variants are involved in 328 different haplotypes (Tables A-E in [S1 File](#)). We denote as “variant allele” or simply “variant”, the allele related to the PGx effect and by Minor Allele Frequency (MAF) its occurrence across each population. In [Fig 1](#) we show the MAF distribution across all 26 populations. It is noticeable that most PGx variants in all populations are rare variants ( $MAF < 0.05$ ).

Using BioMart we extracted chromosome location, gene names (as HGNC symbols) as well as SIFT [38] and PolyPhen [39] scores. SIFT predicts whether an amino acid substitution

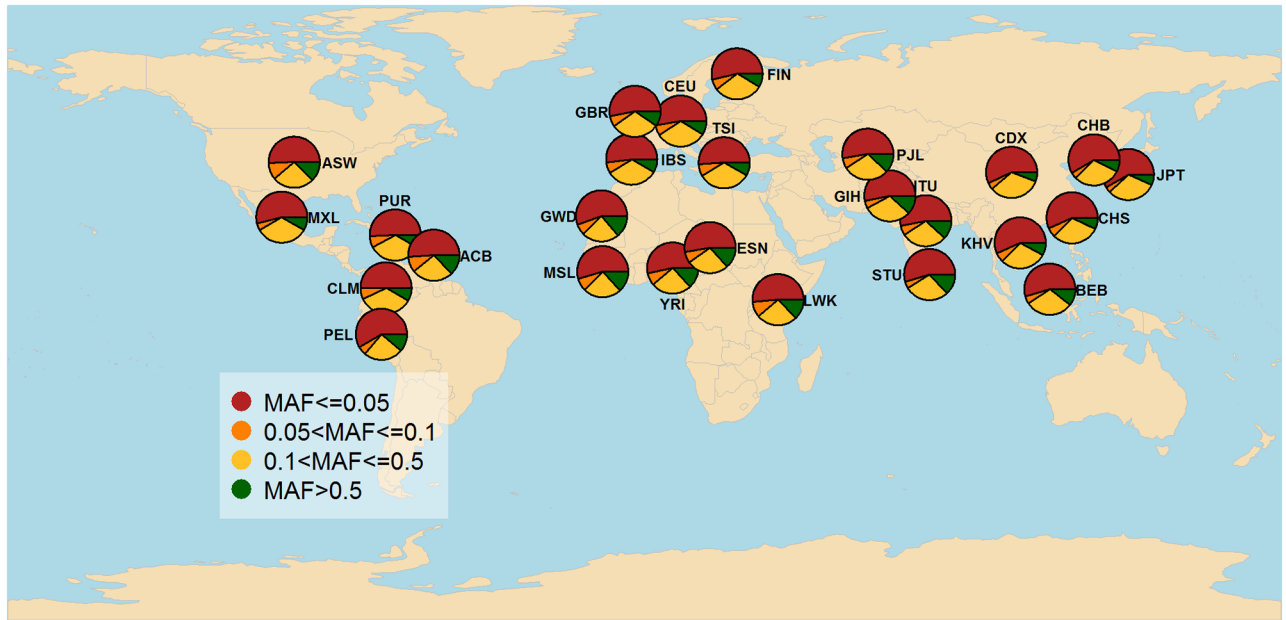

**Fig 1. Geographic MAF distribution of 501 PGx variants found in the 1000 Genomes project populations.**

<https://doi.org/10.1371/journal.pone.0182138.g001>

affects protein function (an amino acid substitution with a SIFT score of less than 0.05 is characterized as deleterious). PolyPhen predicts the possible impact of an amino acid substitution on the structure and function of a human protein (an amino acid substitution with a PolyPhen score greater than 0.15 is possibly damaging). Both predictions rely on whether or not an amino acid is conserved in the protein family, which can be indicative of its importance to the normal function or structure of the expressed protein. There are also some approaches that combine various tools to predict the effects of non-synonymous SNPs or databases, which are specific to a series of genes relevant to the biology of cancer. Herein, we are interested in capturing the overall picture of the PGx effects on the related protein function. Therefore, we adopt a simple classification and color-coding scheme for the functional consequences of PGx variants:

1. PGx variants with SIFT scores greater or equal to 0.05 and PolyPhen scores lower or equal to 0.2 are labeled as “benign” and colored green;
2. PGx variants with SIFT scores lower than 0.05 and PolyPhen scores greater than 0.2 are labeled as “damaging” and colored dark-red;
3. PGx variants for which either SIFT or PolyPhen scores are not available are labeled as “unknown” and colored grey;
4. PGx variants whose SIFT and PolyPhen scores lead to controversial characterizations are labeled as “ambiguous”.

SIFT and PolyPhen scores were calculated using Ensembl’s variant effect predictor (VEP) tool [40]. In Fig 2 we show the chromosomal location and distribution of the inferred (according to the aforementioned classification schema) functional consequences of PGx variants per chromosome.

We noticed that there are no PGx variants of interest on chromosomes 9, 13, 14, 18, 20 and 21. Most 1kG-PGx variants (93 in total) are located on chromosome 2, followed by

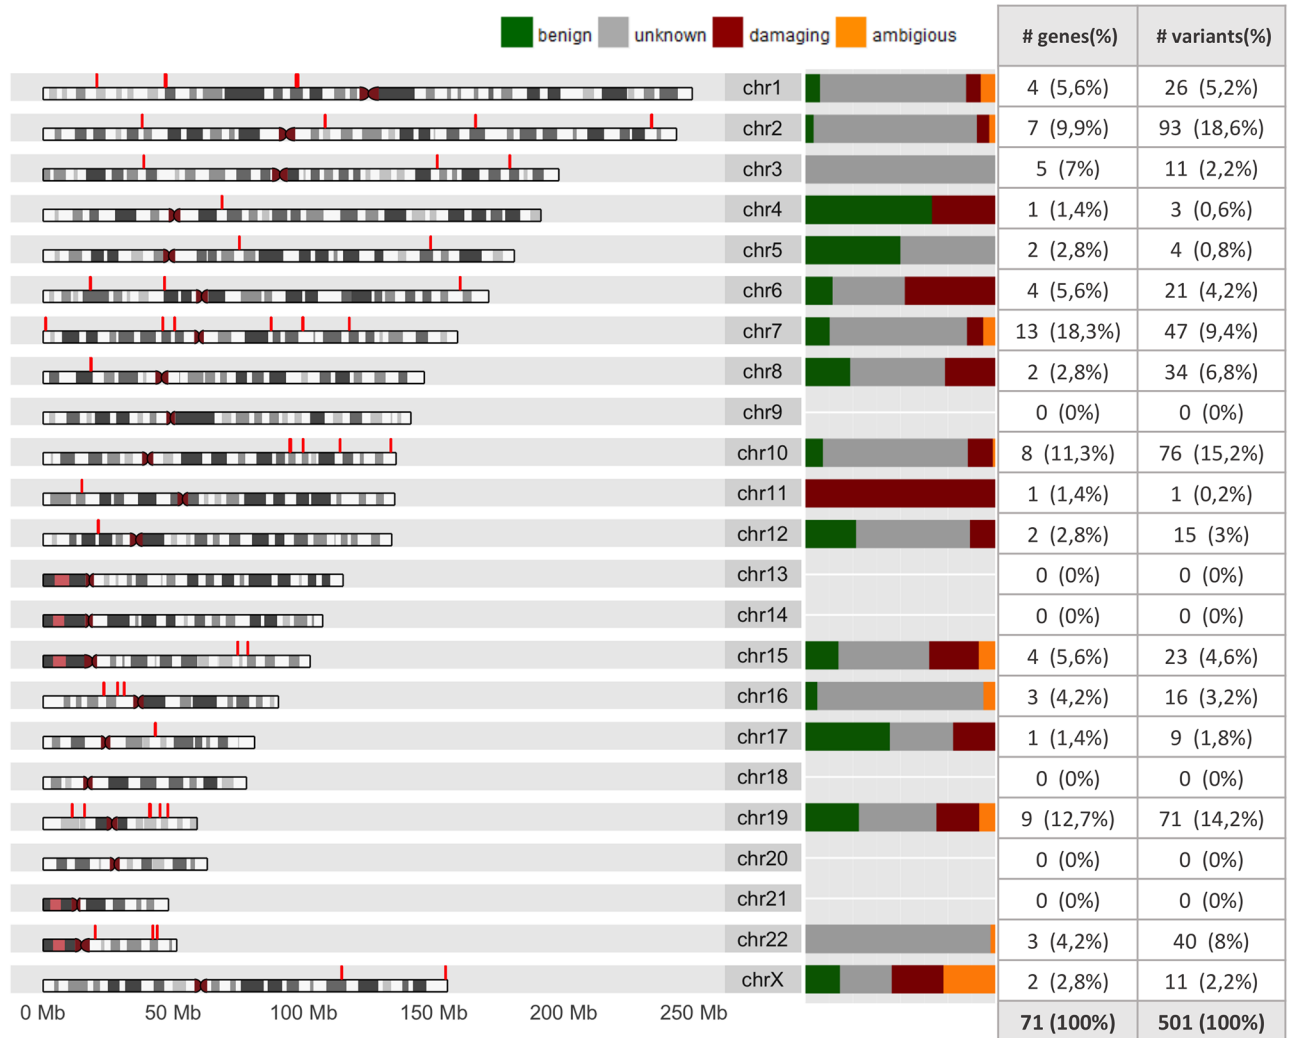

**Fig 2. Chromosomal location and functional consequence distribution per chromosome of the PGx variants.** The accompanied table shows the PGx variants and genes located in each chromosome.

<https://doi.org/10.1371/journal.pone.0182138.g002>

chromosome 10 and 19, with 76 and 71 PGx variants, respectively. We also noticed that even though only one variant has been discovered so far on chromosome 11, this refers to rs61495246, which is a missense variant that associates with Vitamin D hydroxylation-deficient rickets. On chromosome 6, 10 out of the 21 variants were predicted as possibly damaging, while 7 of them were associated with *TPMT* and 3 with *SLC22A1*. All possibly damaging PGx variants were found with  $MAF < 0.05$  in the 1kG population.

Overall, we found 72 possibly damaging and 69 benign PGx variants according to the aforementioned classification. In Fig 3 we show the distribution of common ( $MAF \geq 0.1$ ) possibly damaging (left) and benign (right) PGx variants across the 26 1kG populations. We notice that populations of African ancestry exhibit the greatest number of common possibly damaging PGx variants.

Ramos et al. [41] analyzed an ‘actionable’ subset of 42 variants identified by the FDA as important pharmacogenomic biomarkers, which are also listed in various drug labels and have supporting evidence of clinical utility in PharmGKB. We found 37 of those markers in the

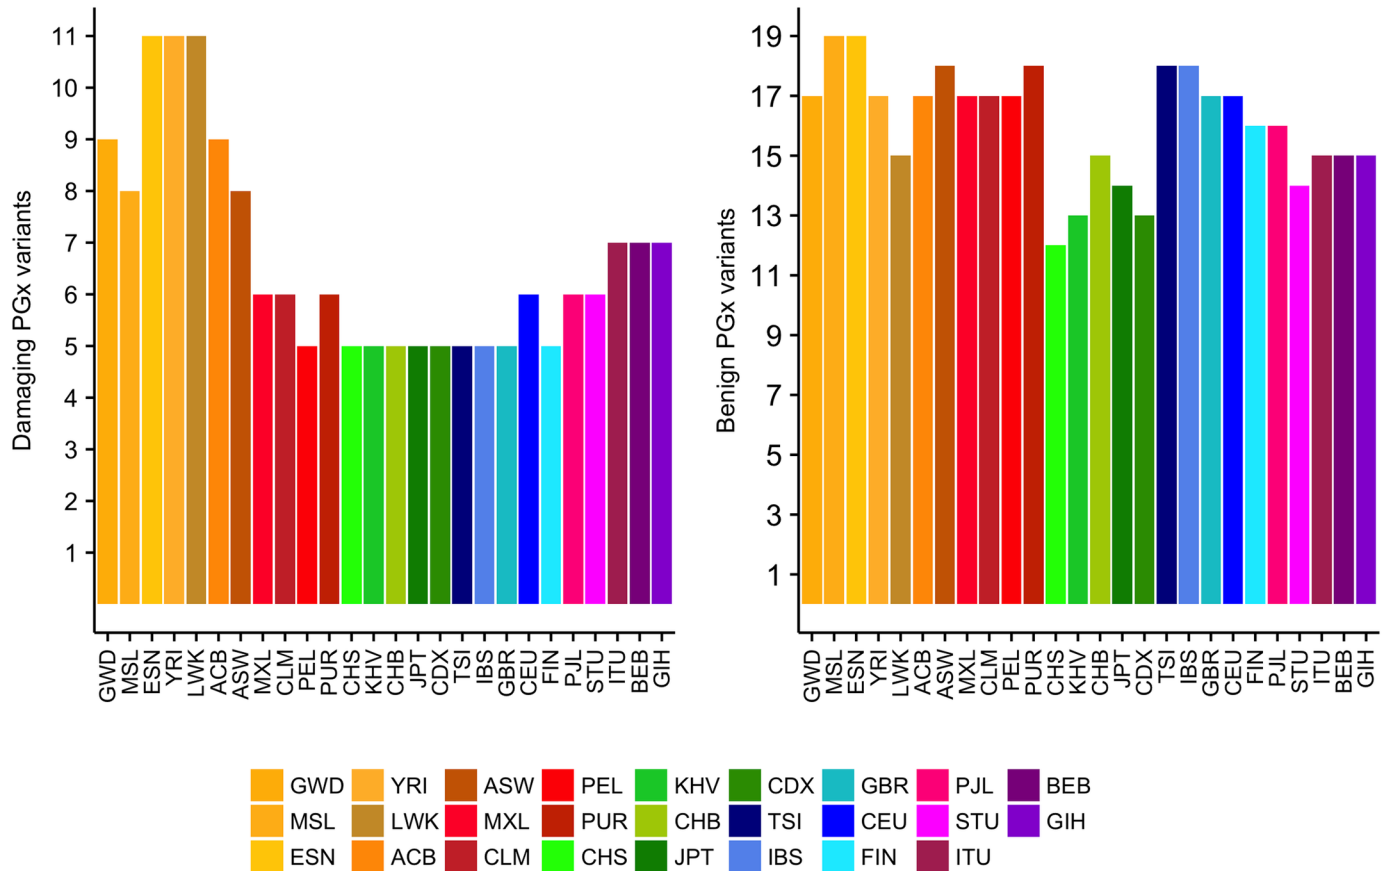

**Fig 3. Distribution of common (MAF ≥ 0.1) possibly damaging (left) and benign (right) PGx variants across 1kG populations.** These are African/AFR (GWD, MSL, ESN, YRI, LWK, ACB, ASW), Ad Mixed America/AMR (MXL, CLM, PEL, PUR), East Asian/EAS (CHS, KHV, CHB, JPT, CDX), European/EUR (TSI, IBS, GBR, CEU, FIN), South Asian/SAS (PJL, STU, ITU, BEB, GIH) ancestral groups.

<https://doi.org/10.1371/journal.pone.0182138.g003>

1kG-p3 dataset. When referring to any of those variants throughout this work, we use italics to designate them.

It is known that common variants are shared across populations, whilst rare variants are often restricted to individual or closely related populations [29]. We searched for variants that are very rare (MAF < 0.005) or common (MAF > 0.1) in at least one population. We found 79 such variants and plotted their MAF heatmaps. As shown in Fig 4, these PGx variants can be indicative of ancestral groups, except from the PEL population which cannot be clustered to any ancestral group, when adjusting the dendrogram according to the minimum height for ancestral clustering.

Notably, rs1048943 (*CYP1A1*) has a MAF of 0.7 in PELs, being a missense variant and thus, a potential prognostic marker for survival outcome after docetaxel plus capecitabine chemotherapy in metastatic breast cancer patients [42]. Furthermore, rs7246981, a missense variant associated with (*CYP2F1*) is found in high frequency (MAF = 0.6) only in PELs. rs2687116 (an intronic variant in the *CYP3A4* gene) and rs2740574 (an upstream variant in the *CYP3A4* gene) are found in exceptionally higher frequencies in all populations of African ancestry. rs2740574 may be associated with an increased likelihood of methadone fatality [43].

Nine of the 79 variants reported herein (rs1050828, rs1057910, rs1142345, rs11569679, rs11572103, rs1801279, rs2256871, rs28399499, rs4986850) are characterized as possibly damaging and therefore, pharmacogenomic-guided drug administration is necessary among

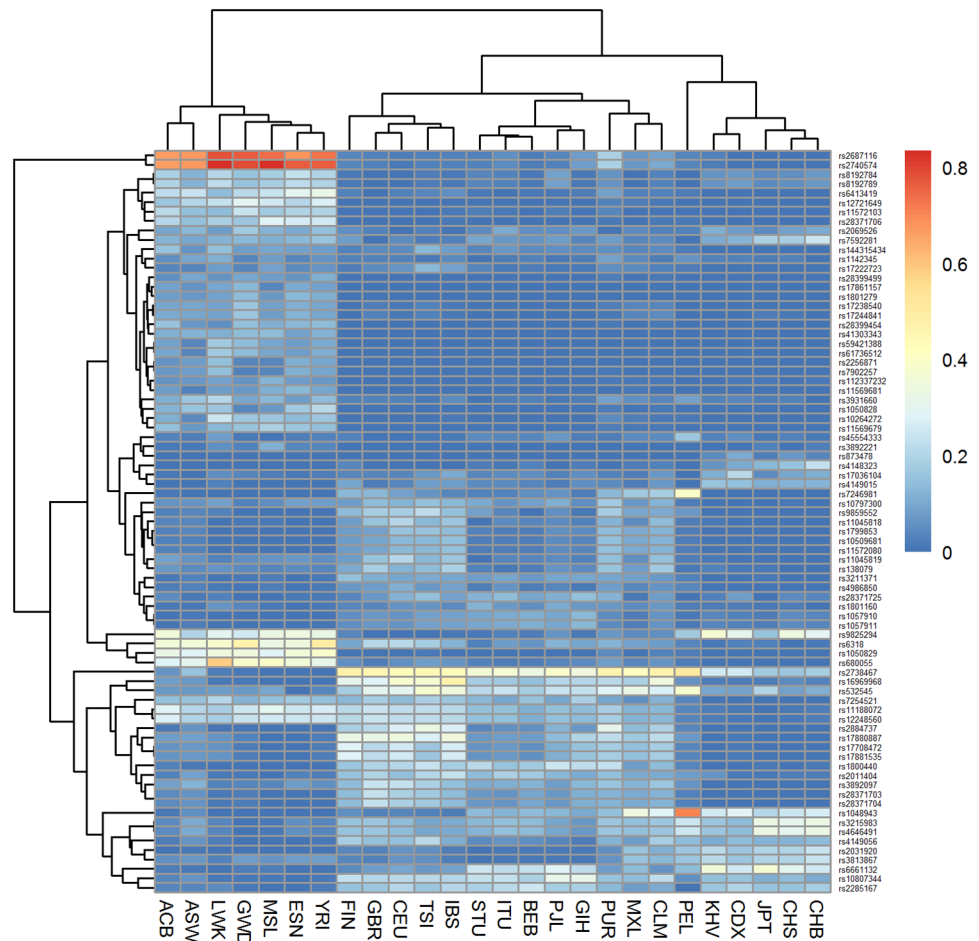

**Fig 4. Minor Allele Frequency heatmap for 79 PGx variants that are common (MAF >= 0.1) and rare (MAF <= 0.005) in at least one 1kG population.**

<https://doi.org/10.1371/journal.pone.0182138.g004>

populations. All nine of them are rare variants with global MAFs < 0.05 except for *rs11572103*, which has a slightly higher global MAF (MAF = 0.055). Overall, we identified three common (MAF > 0.1) damaging PGx variants across all populations studied; *rs72466456* (*NAT2*), *rs3740066* (*ABCC2*) and *rs1799966* (*BRCA1*).

We define  $\Delta$ MAF as the difference between the maximum and the minimum MAF of any ancestral group. In Fig 5 we show the MAF distribution among populations of ten PGx variants that exhibit  $\Delta$ MAF greater than 0.7 among ancestral groups.

The first four PGx variants (*rs9934438*, *rs2359612*, *rs8050894* and *rs7196161*) are *VKORC1* variants. *VKORC1* encodes for vitamin K epoxide reductase complex subunit-1, a small transmembrane protein of the endoplasmic reticulum, which plays a major role in the vitamin K pathway and is the target protein of warfarin. These variants exhibit high MAF in all populations, but the East Asians. In addition, four *CYP3A4* variants (*rs2242480*, *rs2740574*, *rs2687116*, *rs3735451*) are extensively found in their alternative form only in individuals of African Ancestry.

To explore PGx-related population differences visually, we compiled genomic information together with MAFs in a single plot using the GViz R package [44]. In Fig 6 we first plot the



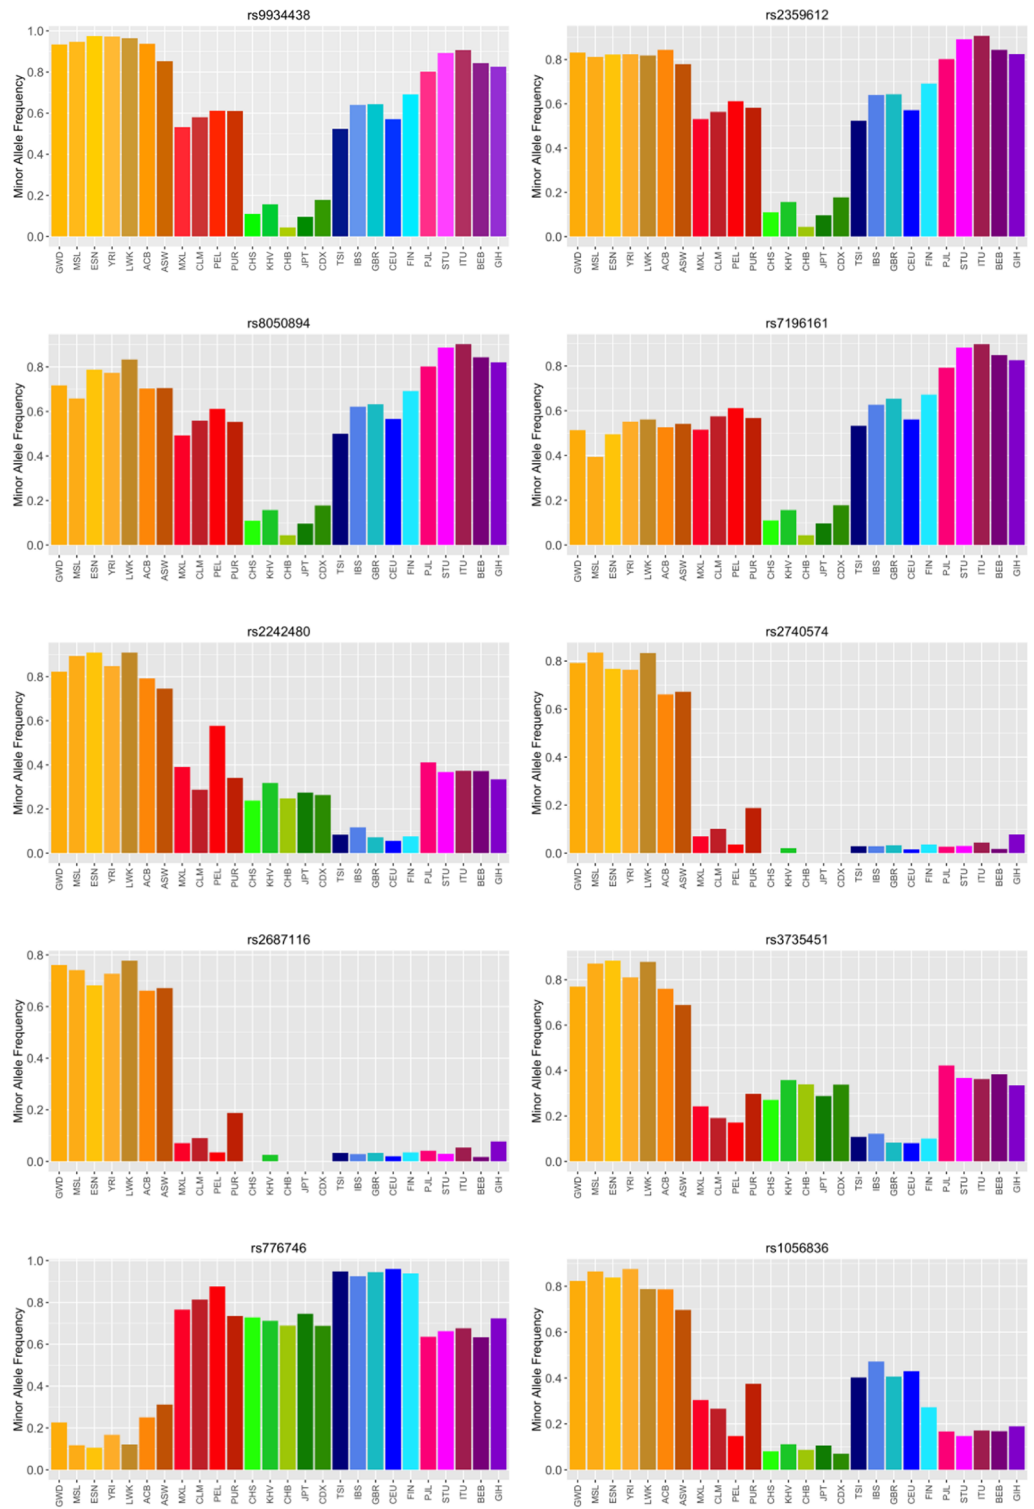

**Fig 5. Minor Allele frequency distribution for the ten most differentiated PGx variants among 1kG ancestral groups.**

<https://doi.org/10.1371/journal.pone.0182138.g005>

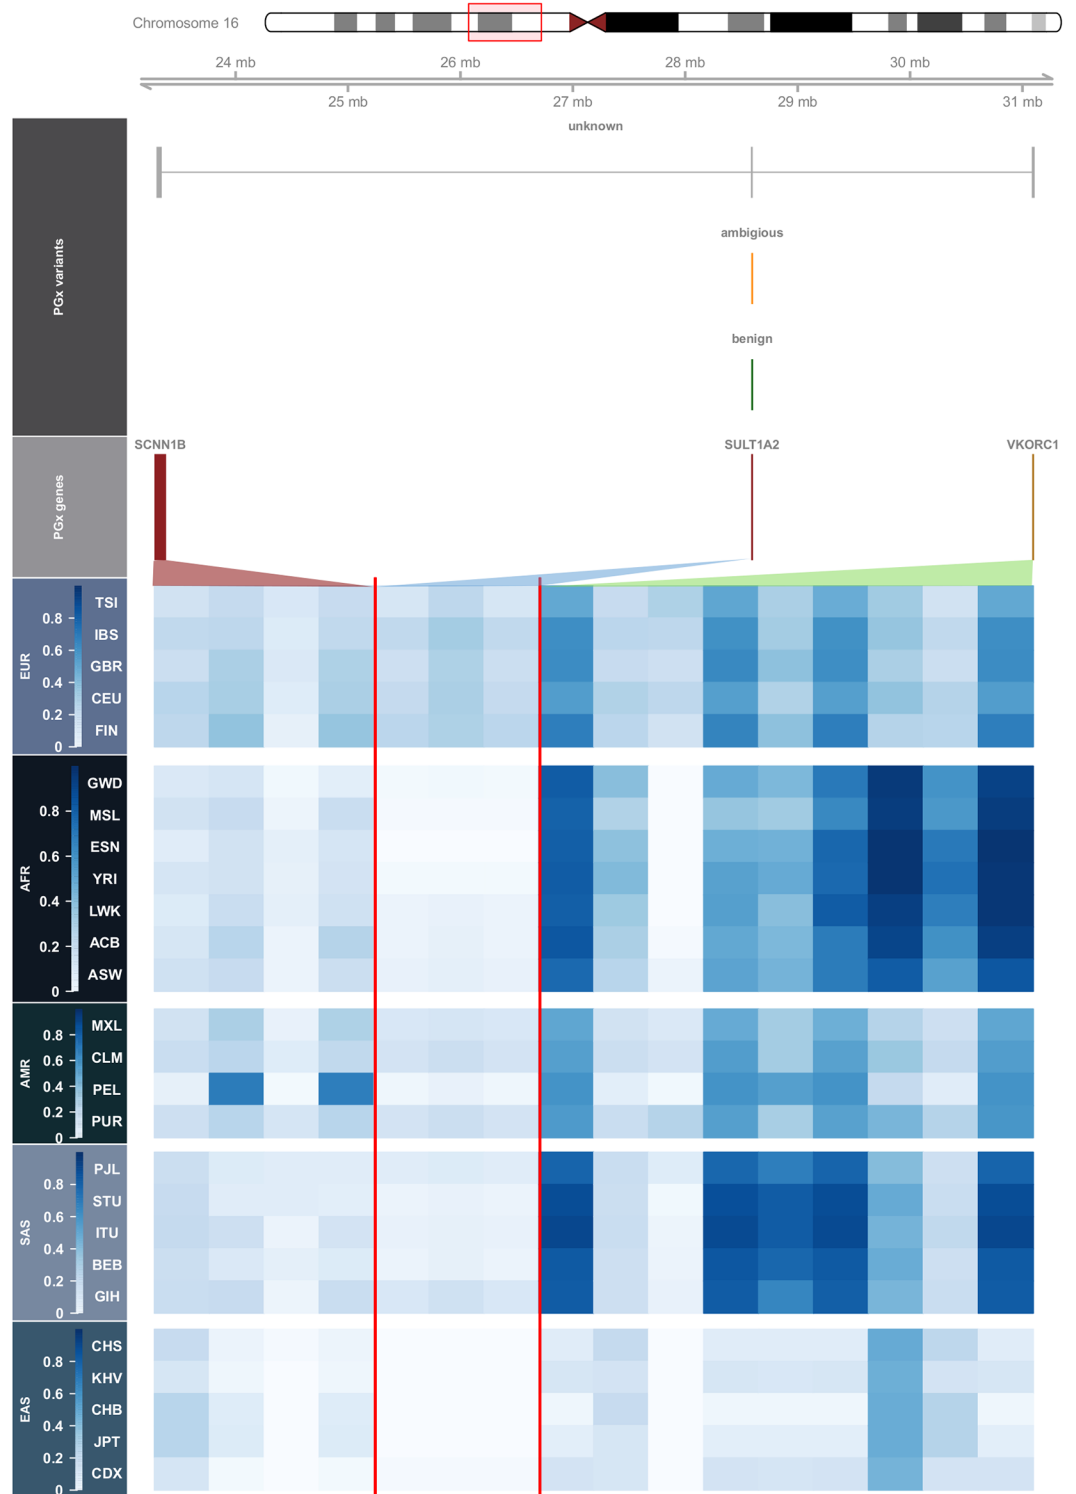

**Fig 6. Genomic annotation plot combined with PGx variant MAFs in 1KG populations.**

<https://doi.org/10.1371/journal.pone.0182138.g006>

chromosome ideogram, where current genomic location is indicated by a red box, followed by a genomic axis. The red box starts at the location of the first PGx variant and ends at the location of the last PGx variant. On the PGx variants track we provide information on the functionality of the PGx variants according to the aforementioned classification ('*unknown*', '*ambiguous*', '*benign*', '*damaging*'). In the chromosome 16 example, we can see that all three genes (*SCNN1B*, *SULT1A2*, *VCORC1*) share unknown variants, whilst *SULT1A2* relates to both benign and ambiguous variants. On the PGx genes track we show the genes of interest and their PGx variants which are located on chromosome 16 (their width is analogous to the location of their variants). Subsequently, we provide a heatmap of the MAFs on all populations grouped by their ancestry, according to which the darker the color code, the greatest the MAF is, while the vertical red line separates the variants of different genes.

## Pharmacogenomics haplotype analysis among populations

Given that PGx markers are discovered using genotyping arrays, most PGx variants are "tags" for haplotypes on which the directly functional variants reside. However, as already shown, several PGx variants are population-specific and thus, some tests might perform well only on those populations that follow the haplotype structure that these tests underlie. Samwald and coworkers [45] examined the accuracy of such haplotype inferences across different 1kG populations and found that current haplotype definitions are incomplete when the actual 1kG data are considered for a large fraction of samples.

Fig 7 depicts the percentage of individual haplotypes that did not match to any given haplotype. Indeed, we found unmatched haplotypes in 55 out of 65 genes. Genes with the least haplotype coverage in 1kG data include *NAT2*, *CYP2C19*, *CYP2B6*, *SLCO1B1*, *UGT1A1*, *ABCB1*, *VKORC1* and *TPMT*.

Since a PGx haplotype consists of one or more variants in their alternative form, we define as "haplotype variability" the number of variants in their alternative form that a haplotype enables. By definition, a "wild type" haplotype has zero alternative variants. At first, we investigated the number of PGx variants in their alternative form that were included in a haplotype. We found that 91% of haplotypes include up to three PGx variants and just eleven haplotypes (1 in *CYP2C19*, 3 in *CYP4A22*, 1 in *SULT4A1* and 6 in *UGT1A3*) include a relatively large (>5) number of alternative PGx variants. In particular, *UGT1A3*\*2c and *CYP2C19*\*2C include 11 such variants.

Herein, most of the individuals were matched to "wild type" haplotypes. However, 20–30% of individuals were matched to haplotypes of high variability, since 33% of all individuals were matched to the *UGT1A3*\*2a haplotype. We report that *UGT1A3*\*2a refers to 9 different PGx variants in their alternative form and is correlated with increased atorvastatin lactonization, which may affect its lipid-lowering effect [46]. Additionally, 19% of the individuals tested matched to the *CYP4A22*\*12A haplotype, which refers to the alternative form of 6 PGx variants, while 14% of all individuals were matched to the *CYP4A22*\*15 haplotype (8 PGx variants). Noteworthy, the genomic variants and haplotype structures of the *CYP4A22* gene have been extensively studied in a Japanese population [47]. Last, 22% of 1kG-p3 individuals were matched to the *SULT4A1*\*5 haplotype, which refers to the alternative form of 8 PGx variants. *SULT4A1* codes for a brain-specific sulfotransferase that is believed to be involved in the metabolism of neurotransmitters. There is a surprising amount of heterogeneity in the genetic diversity of the different *SULT* genes. *SULT4A1* is the most highly conserved gene through evolution, sharing over 97.5% sequence identity between mouse, rat, chimp and human *SULT4A1* coding sequences [48]. In Table 1, we report the Haplotype Frequencies (HAFs) per ancestry group for four haplotypes that exhibit the highest variability and significant

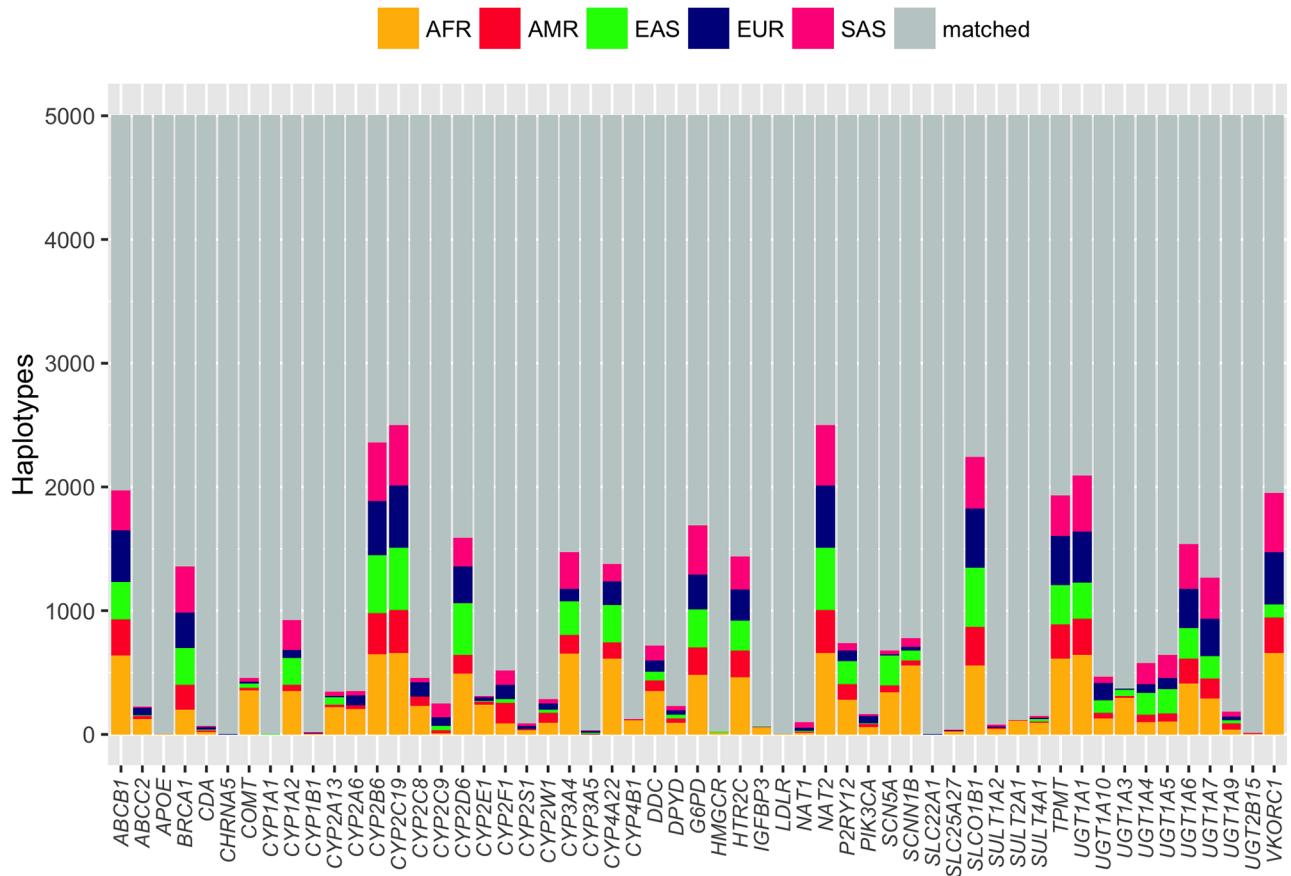

**Fig 7. Individual haplotypes that did not match to any known haplotype per gene.** Colours represent the five ancestral groups. Grey fills indicate haplotype matches.

<https://doi.org/10.1371/journal.pone.0182138.g007>

percentage match to the different ancestral groups. The global (among all individuals) haplotype frequency is depicted in the last column.

We also discovered 53 haplotypes with common ( $HAF \geq 0.1$ ) and rare ( $HAF \leq 0.005$ ) haplotype frequencies in at least one population. As shown in Fig 8, we noticed that highly differentiated haplotypes result from either a single population difference, such as in the *CYP1A1\*2B* for PELs, or more often from populations of common ancestry.

From the 328 haplotypes that match at least one population, most of them (40%) matched to all populations, as opposed to the 11% that are found in a single population. In total, 130 haplotypes match to individuals from all populations. The % percentage of haplotypes that match all populations is 37%, as opposed to the low frequency of haplotypes (2%) that match just one population.

**Table 1. Matching distribution of individuals per ancestry group for the haplotypes with the highest variability and significant percentage match.**

| Gene Haplotype     | Variability | AFR  | AMR  | EAS  | EUR  | SAS  | Global |
|--------------------|-------------|------|------|------|------|------|--------|
| <i>CYP4A22*12A</i> | 6           | 0.16 | 0.13 | 0.25 | 0.11 | 0.26 | 0.17   |
| <i>CYP4A22*15</i>  | 8           | 0.01 | 0.10 | 0.30 | 0.08 | 0.24 | 0.12   |
| <i>SULT4A1#5</i>   | 8           | 0.34 | 0.15 | 0.07 | 0.21 | 0.26 | 0.20   |
| <i>UGT1A3*2a</i>   | 9           | 0.48 | 0.35 | 0.12 | 0.25 | 0.41 | 0.27   |

<https://doi.org/10.1371/journal.pone.0182138.t001>

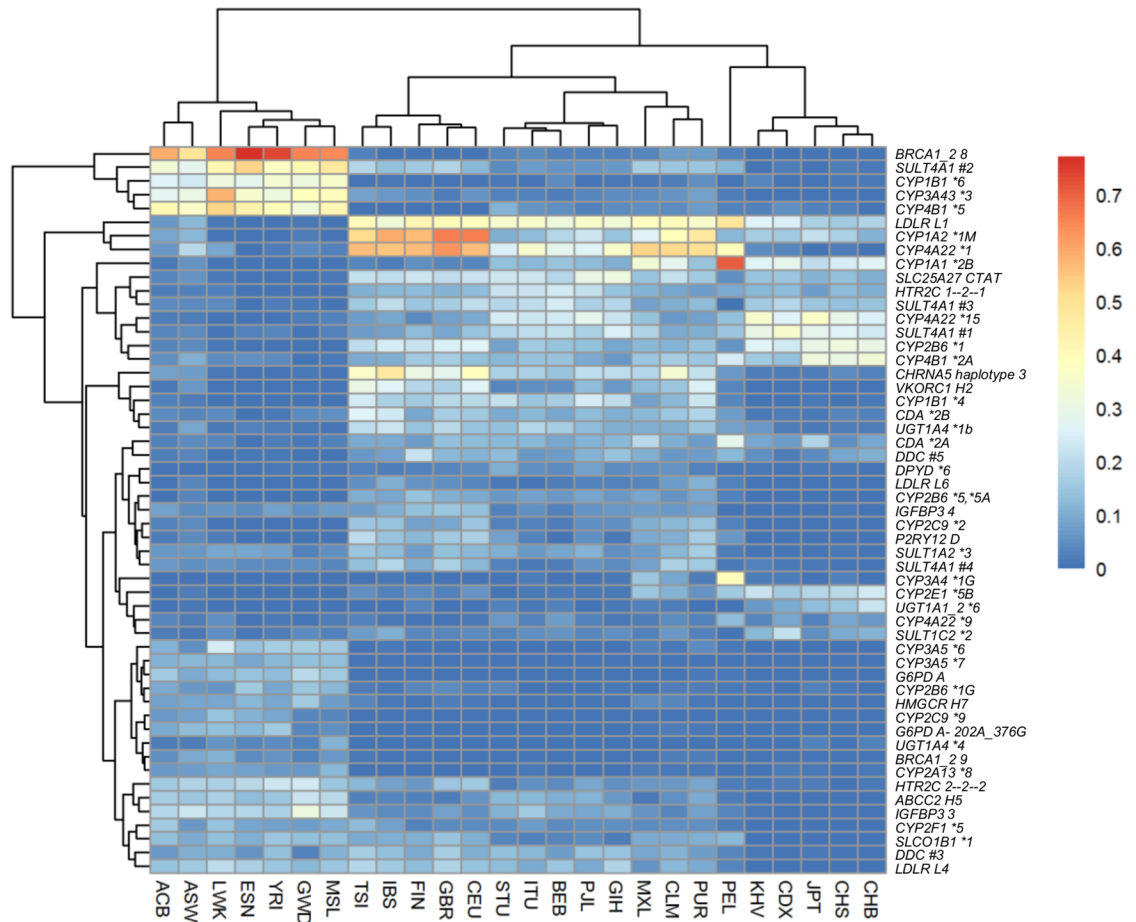

**Fig 8. Haplotype Frequency (HAF) heatmap for 53 PGx haplotype that are common (HAF >= 0.1) and rare (HAF <= 0.005) in at least one 1kG population.**

<https://doi.org/10.1371/journal.pone.0182138.g008>

### Pharmacogenomics phenotype analysis among populations

Next, we defined three PGx phenotypes as inferred by the related genotype profiles and adopted a color classification schema to indicate them: ‘WT/WT’ (wild-type/wild-type) in green, where both alleles match ‘WT’ haplotypes; ‘WT/V’ (wild-type/variant) in yellow, where one of the alleles match a ‘WT’ and the other one a ‘V’ haplotype; and ‘V/V’ (variant/variant) in dark red, where both alleles match ‘V’ haplotypes. We assume that wild type/wild type (WT/WT) vs. wild type/variant (WT/V) vs. variant/variant (V/V) haplotypes lead to normal, intermediate and abnormal drug metabolizing statuses, respectively. In Fig 9 we show the phenotypic distribution for 5 genes, for which a phenotype was assigned in most (>= 90%) individuals (one or more phenotypes is found with frequency 80% or greater in one population and 20% or lower in another).

High phenotypic differences appear mainly among ancestral groups. It is noticeable that although most populations are probably *CYP3A43* WT/WT drug meta, African ancestry populations and especially LWKs are mostly WT/V or even V/V drug metabolizers. By using ePGA’s explore service (<https://www.epga.gr/explore/>), we can easily find that *CYP3A43* is related to olanzapine, an atypical antipsychotic, approved by the FDA for the treatment of schizophrenia and bipolar disorder. We were unable to find any drugs related to *CYP1B1* and

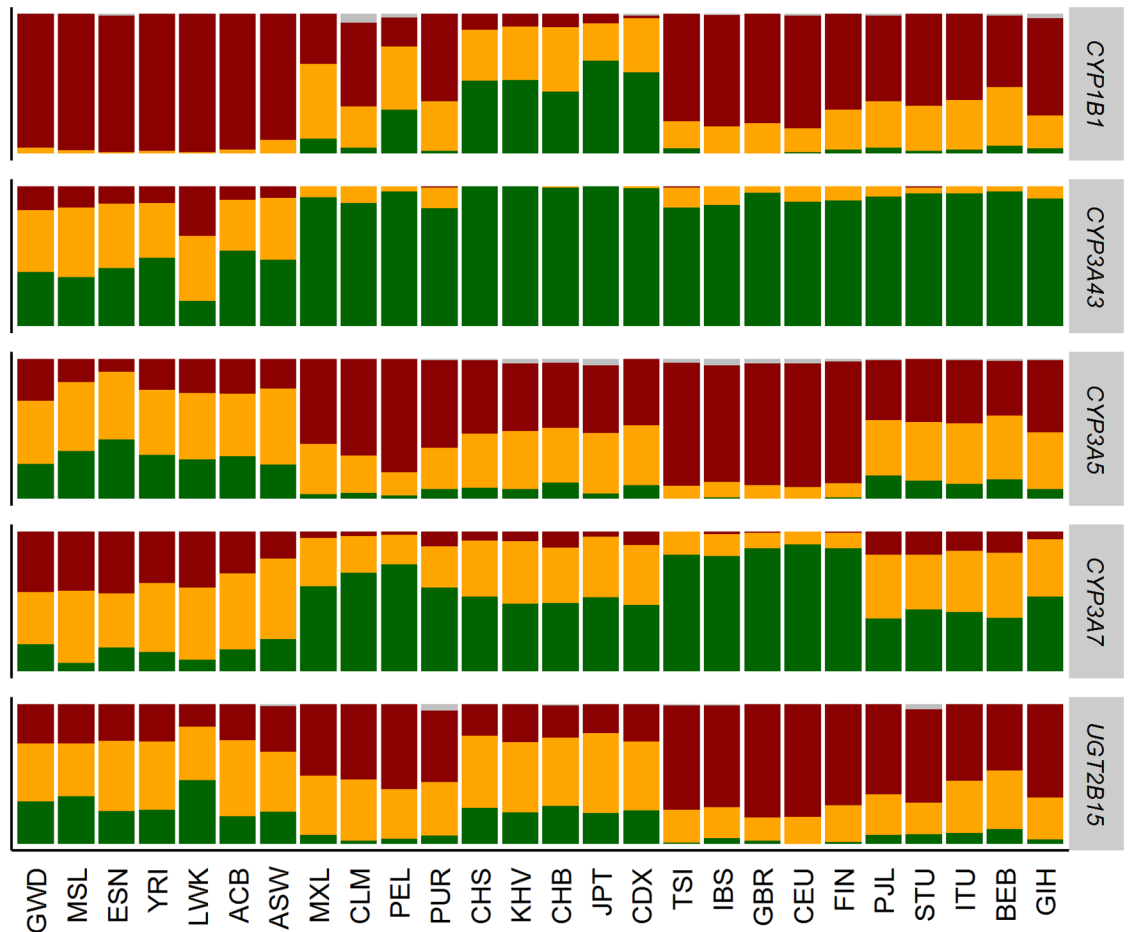

**Fig 9. Distribution of three phenotypes (WT/WT-green, WT/V-orange, V/V-red) for 5 highly covered genes with high phenotypic difference among 1kG populations.**

<https://doi.org/10.1371/journal.pone.0182138.g009>

*CYP3A7*. *CYP3A5* is related to 17 different drugs and *UGT2B15* is related to oxazepam and sipoglitazar. The ePGA's explore service retrieves gene-drug information from PharmGKB.

## Conclusions

The advent of genome sequencing technologies has led to an enormous and rather complex amount of data revealing the vast complexity of our genome architecture. To this end, the Precision Medicine Initiative Working Group of the National Institutes of Health has recommended that the All of Us Research Program (<https://www.nih.gov/research-training/allofus-research-program>) should enroll participants from diverse social, racial/ethnic, ancestral, geographic, and economic backgrounds, from all age groups and health statuses to broadly reflect the diversity of the U.S. population. To better study and understand our genomic variation, efficient computational tools enriched with exploratory and analysis features that can provide meaningful visualizations for the translation from genotype to phenotype are necessary.

Herein, we demonstrated how we can discover PGx knowledge from the exploratory analysis of ePGA data by exploiting publicly available genetic data. We showed that PGx biomarkers are able to distinguish population groups and thus, can be exploited to design and develop

stratified clinical trials. Interesting exploratory findings can be made either at the molecular level (PGx variant- haplotype-phenotype) or by exploring PGx information globally at the ancestral or population level. At the variant level, we found that most PGx variants in all populations are rare variants ( $MAF < 0.05$ ). We identified three damaging PGx variants common ( $MAF > 0.1$ ) to all populations and 72 possibly damaging rare PGx variants (mean global  $MAF = 0.03$ ). Populations of African ancestry were found to have the greatest number of common ( $MAF > 0.1$ ) damaging PGx variants. Notably, 79 PGx variants were very rare ( $MAF < 0.005$ ) and/or common ( $MAF > 0.1$ ) in at least one population, 9 of which are possibly damaging PGx variants and therefore, pharmacogenomic-guided drug administration across populations seems necessary. At the haplotype level, we found that 91% of haplotypes refer to up to three PGx variants (alternative alleles). 53 haplotypes with frequency greater or equal to 0.1 in at least one population and lower or equal to 0.005 in another varied among populations. The *CYP4A22* \*15 haplotype which refers to 8 PGx variants in their alternative form was more frequently matched to East Asian populations. At the phenotypic level, we found 5 genes, for which a phenotype was assigned in most ( $> 90\%$ ) individuals, while one or more phenotypes were found in least 80% in one population and at most 20% in another. High phenotypic differences appeared mainly among ancestral groups.

Herein, publicly available data serve as a model to illustrate the means as well as the findings of interest and as such, of importance. Indeed, we describe how and why, by further exploring publicly available data (1000 Genomes Project), the user reveals pharmacogenomic (PGx) findings in three different levels of information (variant- haplotype-phenotype levels) to ensure data quality towards clinical implementation: a. even though 79 PGx variants differ among populations ( $MAF > 0.1$  and  $MAF < 0.005$  in at least one 1kG population), only 46 PGx variants differ among populations when haplotypes are considered (those with  $HAF > 0.1$  and  $HAF \leq 0.005$  in at least one population); b. when phenotypes are considered, only three genes (*CYP1B1*, *CYP3A43* and *CYP3A5*) constitute phenotypes with variable distribution among populations (one or more phenotypes is found with frequency 80% or greater in one population and 20% or lower in another) and c. to the best of our knowledge, this is one of the very few analysis that further support the outcome of Mizzi et al. [49] and Zhou et al. [50] regarding population differences and their implications for clinical PGx. As an example, we report that rs1048943 (*CYP1A1*) has a  $MAF$  of 0.7 in PELs (see Fig 4), being a missense variant and thus, a potential prognostic marker for survival outcome after docetaxel plus capecitabine chemotherapy in metastatic breast cancer patients. The *CYP1A1* \*2B haplotype that includes both rs1048943 and rs4646903 is also found in high frequency only in PELs (Fig 8). However, *CYP1A1* does not show high phenotypic differentiation (as defined in this work) among populations. Such findings suggest that PGx researchers and clinicians should study PGx findings from the genotype to phenotype level and not focus on a single level of information, since a single variant may be extensively variable among populations, yet its effect on the phenotype of interest may be masked or modified by one or more variants.

Ongoing and future work involves the integration of the exploratory and visualization methods developed herein in ePGA services and the extension of those methods to include MutationInfo (<http://mutationinfo.readthedocs.io/en/latest/>), a python package that extracts the position, the reference and the alternative sequence of a genomic variant and accepts variants in dbSNP rs or HGVS format. We envisage to integrate genotype to phenotype translation, exploration and analysis of pharmacogenomic data into a single tool with the aim to enable population-based pharmacogenomics and catalyze the integration of pharmacogenomics into the clinic.

## Supporting information

**S1 File.**  
(XLSX)

## Acknowledgments

Part of this work was funded by grants from the European Commission [FP7-305444 (RD-Connect); H2020-668353 (U-PGx)] and the OPCE II; Greek-EU operational program (11ΣΥΝ\_10\_145; eMoDiA) to GPP.

## Author Contributions

**Conceptualization:** George P. Patrinos.

**Data curation:** Kleanthi Lakiotaki, Theodora Katsila, George Potamias.

**Formal analysis:** Kleanthi Lakiotaki, Alexandros Kanterakis, Evgenia Kartsaki, George Potamias.

**Funding acquisition:** George P. Patrinos.

**Methodology:** George P. Patrinos.

**Project administration:** George P. Patrinos, George Potamias.

**Supervision:** George P. Patrinos, George Potamias.

**Validation:** Evgenia Kartsaki.

**Writing – original draft:** Kleanthi Lakiotaki, Alexandros Kanterakis, Theodora Katsila, George P. Patrinos.

**Writing – review & editing:** Theodora Katsila, George P. Patrinos.

## References

1. Hughes HB, Biehl JP, Jones AP, Schmidt LH. Metabolism of isoniazid in man as related to the occurrence of peripheral neuritis. *Am Rev Tuberc.* 1954; 2: 266–273. Available: <https://www.ncbi.nlm.nih.gov/pubmed/13180863>
2. Alving AS, Carson PE, Flanagan CL, Ickes CE. Enzymatic deficiency in primaquine-sensitive erythrocytes. *Science (80-).* 1956; 3220: 484–485. Available: <https://www.ncbi.nlm.nih.gov/pubmed/13360274>
3. Kalow W. Familial incidence of low pseudocholinesterase level. *Lancet.* Elsevier; 1956; 268: 576–577. [https://doi.org/10.1016/S0140-6736\(56\)92065-7](https://doi.org/10.1016/S0140-6736(56)92065-7)
4. Veterans Administration Cooperative Study Group on Antihypertensive Agents. Comparison of Propranolol and Hydrochlorothiazide for the Initial Treatment of Hypertension. *J Am Med Association.* 1981; 248: 1996–2003.
5. T R, S NL. Bidil for heart failure in black patients: The u.s. food and drug administration perspective. *Ann Intern Med.* 2007; 146: 57–62. <https://doi.org/10.7326/0003-4819-146-1-200701020-00010> PMID: 17200223
6. Prowell TM, Theoret MR, Pazdur R. Will Precision Medicine Move Us beyond Race? *N Engl J Med.* 2016; 374: 2001–2003.
7. Chan SL, Samaranayake N, Ross CJD, Toh MT, Carleton B, Hayden MR, et al. Genetic diversity of variants involved in drug response and metabolism in Sri Lankan populations. *Pharmacogenet Genomics.* 2016; 26: 28–39. <https://doi.org/10.1097/FPC.0000000000000182> PMID: 26444257
8. Nebert D, Menon A. Pharmacogenomics, ethnicity, and susceptibility genes. *Pharmacogenomics J.* 2001; 1: 19–22. <https://doi.org/10.1038/sj.tpj.6500002> PMID: 11913722
9. Johnson J. Ethnic Differences in Cardiovascular Drug Response Potential Contribution of Pharmacogenetics. *Circulation.* 2008; 118: 1383–1393. <https://doi.org/10.1161/CIRCULATIONAHA.107.704023> PMID: 18809808



10. Kubo K, Ohara M, Tachikawa M, Cavallari LH, Lee MTM, Wen MS, et al. Population differences in S-warfarin pharmacokinetics among African Americans, Asians and whites: their influence on pharmacogenetic dosing algorithms. *Pharmacogenomics J*. Nature Publishing Group; 2016; 1–7. <https://doi.org/10.1038/tpj.2016.57> PMID: 27503578
11. Ramamoorthy A, Pacanowski MA, Bull J, Zhang L. Racial/ethnic differences in drug disposition and response: review of recently approved drugs. *Clin Pharmacol Ther*. 2015; 97: 263–273. <https://doi.org/10.1002/cpt.61> PMID: 25669658
12. Gibson G. Rare and common variants: twenty arguments. *Nat Rev Genet*. Nature Publishing Group; 2012; 13: 135–145. <https://doi.org/10.1038/nrg3118> PMID: 22251874
13. Potamias G, Lakiotaki K, Katsila T, Lee MTM, Topouzis S, Cooper DN, et al. Deciphering next-generation pharmacogenomics: an information technology perspective. *Open Biol*. 2014; 4. <https://doi.org/10.1098/rsob.140071> PMID: 25030607
14. Motsinger-Reif A a., Jorgenson E, Relling M V., Kroetz DL, Weinshilboum R, Cox NJ, et al. Genome-wide association studies in pharmacogenomics: successes and lessons. *Pharmacogenet Genomics*. 2010; 1. PMID: 20639796
15. Altman RB, Whirl-Carrillo M, Klein TE. Challenges in the pharmacogenomic annotation of whole genomes. *Clin Pharmacol Ther*. 2013; 94: 211–3. <https://doi.org/10.1038/clpt.2013.111> PMID: 23708745
16. Padmanabhan S, Wang G. Handbook of Pharmacogenomics and Stratified Medicine [Internet]. Handbook of Pharmacogenomics and Stratified Medicine. 2014.
17. O'Donnell PH, Bush A, Spitz J, Danahey K, Saner D, Das S, et al. The 1200 patients project: creating a new medical model system for clinical implementation of pharmacogenomics. *Clin Pharmacol Ther*. 2012; 92: 446–9. <https://doi.org/10.1038/clpt.2012.117> PMID: 22929923
18. Katsila T, Patrinos GP. Whole genome sequencing in pharmacogenomics. *Front Pharmacol*. Frontiers Media S.A.; 2015; 6: 61. <https://doi.org/10.3389/fphar.2015.00061> PMID: 25859217
19. Salleh MZ, Teh LK, Lee LS, Ismet RI, Patowary A, Joshi K, et al. Systematic Pharmacogenomics Analysis of a Malay Whole Genome: Proof of Concept for Personalized Medicine. *PLoS One*. 2013; 8. <https://doi.org/10.1371/journal.pone.0071554> PMID: 24009664
20. Wilson JF, Weale ME, Smith A C, Gratrix F, Fletcher B, Thomas MG, et al. Population genetic structure of variable drug response. *Nat Genet*. 2001; 29: 265–269. <https://doi.org/10.1038/ng761> PMID: 11685208
21. Administration UF and D. Guidance for industry: Clinical pharmacogenomics: Premarket evaluation in early-phase clinical studies and recommendations for labeling, 2013. UCM337169 pdf. 2013; <http://scholar.google.com/scholar?hl=en&btnG=Search&q=intitle:Guidance+for+Industry+Clinical+Pharmacogenomics+:+Premarket+Evaluation+in+Early-Phase+Clinical+Studies+and+Recommendations#0%5Cnhttp://scholar.google.com/scholar?hl=en&btnG=Search&q=intitle:Guida>
22. van der Wouden CH, Cambon-Thomsen A, Cecchin E, Cheung K-C, Dávila-Fajardo CL, Deneer VH, et al. Implementing Pharmacogenomics in Europe: Design and Implementation Strategy of the Ubiquitous Pharmacogenomics Consortium. *Clin Pharmacol Ther*. 2017; 101: 341–358. <https://doi.org/10.1002/cpt.602> PMID: 28027596
23. Shuldiner A R, Relling M V, Peterson JF, Hicks JK, Freimuth RR, Sadee W, et al. The Pharmacogenomics Research Network Translational Pharmacogenetics Program: overcoming challenges of real-world implementation. *Clin Pharmacol Ther*. 2013; 94: 207–10. <https://doi.org/10.1038/clpt.2013.59> PMID: 23588301
24. Pereira NL, Sargent DJ, Farkouh ME, Rihal CS. Genotype-based clinical trials in cardiovascular disease. *Nat Rev Cardiol*. Nature Publishing Group; 2015; <https://doi.org/10.1038/nrcardio.2015.64> PMID: 25940926
25. Bachtiar M, Lee CGL. Genetics of Population Differences in Drug Response. 2013; 162–170. <https://doi.org/10.1007/s40142-013-0017-3>
26. Limaye N. Pharmacogenomics, theranostics and personalized medicine—The complexities of clinical trials: Challenges in the developing world. *Appl Transl Genomics*. Elsevier B.V.; 2013; 2: 17–21. <https://doi.org/10.1016/j.atg.2013.05.002> PMID: 27942441
27. Hoskins JM, Carey L a, McLeod HL. CYP2D6 and tamoxifen: DNA matters in breast cancer. *Nat Rev Cancer*. Nature Publishing Group; 2009; 9: 576–586. <https://doi.org/10.1038/nrc2683> PMID: 19629072
28. Li J, Zhang L, Zhou H, Stoneking M, Tang K. Global patterns of genetic diversity and signals of natural selection for human ADME genes. *Hum Mol Genet*. 2011; 20: 528–540. <https://doi.org/10.1093/hmg/ddq498> PMID: 21081654
29. Auton A, Abecasis GR, Altshuler DM, Durbin RM, Abecasis GR, Bentley DR, et al. A global reference for human genetic variation. *Nature*. 2015; 526: 68–74. <https://doi.org/10.1038/nature15393> PMID: 26432245

30. Whirl-Carrillo M, McDonagh EM, Hebert JM, L. Gong KS, Thorn CF, Altman RB, et al. Pharmacogenomics knowledge for personalized medicine. *Clin Pharmacol Ther.* 2012; 92: 414–417. <https://doi.org/10.1038/clpt.2012.96> PMID: 22992668
31. Relling M V, Klein TE. CPIC: Clinical Pharmacogenetics Implementation Consortium of the Pharmacogenomics Research Network. *Clin Pharmacol Ther.* Nature Publishing Group; 2011; 89: 464–7. <https://doi.org/10.1038/clpt.2010.279> PMID: 21270786
32. Giacomini KM, Brett CM, Altman RB, Benowitz NL, Dolan ME, Flockhart D a, et al. The pharmacogenetics research network: from SNP discovery to clinical drug response. *Clin Pharmacol Ther.* 2007; 81: 328–45. <https://doi.org/10.1038/sj.clpt.6100087> PMID: 17339863
33. Robarge JD, Li L, Desta Z, Nguyen A, Flockhart DA. The Star-Allele Nomenclature: Retooling for Translational Genomics. *Clin Pharmacol Ther.* 2007; 82: 244–248. <https://doi.org/10.1038/sj.clpt.6100284> PMID: 17700589
34. Sim SC, Ingelman-Sundberg M. The Human Cytochrome P450 (CYP) Allele Nomenclature website: a peer-reviewed database of CYP variants and their associated effects. *Hum Genomics.* 2010; 4: 278–281. <https://doi.org/10.1186/1479-7364-4-4-278> PMID: 20511141
35. Lakiotaki K, Kartsaki E, Kanterakis A, Katsila T, Patrinos GP, Potamias G. ePGA: A Web-Based Information System for Translational Pharmacogenomics. *PLoS One.* 2016; 11: e0162801. <https://doi.org/10.1371/journal.pone.0162801> PMID: 27631363
36. Smedley D, Haider S, Durinck S, Pandini L, Provero P, Allen J, et al. The BioMart community portal: An innovative alternative to large, centralized data repositories. *Nucleic Acids Res.* 2015; 43: W589–W598. <https://doi.org/10.1093/nar/gkv350> PMID: 25897122
37. Lin GG, Scott JG. NIH Public Access. 2012; 100: 130–134.
38. Ng PC, Henikoff S. SIFT: Predicting amino acid changes that affect protein function. *Nucleic Acids Res.* 2003; 31: 3812–3814. <https://doi.org/10.1093/nar/gkg509> PMID: 12824425
39. Adzhubei I a, Schmidt S, Peshkin L, Ramensky VE, Gerasimova A, Bork P, et al. A method and server for predicting damaging missense mutations. *Nat Methods.* Nature Publishing Group; 2010; 7: 248–249. <https://doi.org/10.1038/nmeth0410-248> PMID: 20354512
40. McLaren W, Gil L, Hunt SE, Riat HS, Ritchie GRS, Thormann A, et al. The Ensembl Variant Effect Predictor. *bioRxiv. Genome Biology;* 2016; 42374. <https://doi.org/10.1101/042374>
41. Ramos E, Doumatey A, Elkahoulou A G, Shriner D, Huang H, Chen G, et al. Pharmacogenomics, ancestry and clinical decision making for global populations. *Pharmacogenomics J.* Nature Publishing Group; 2014; 14: 217–22. <https://doi.org/10.1038/tpj.2013.24> PMID: 23835662
42. Dong N, Yu J, Wang C, Zheng X, Wang Z, Di L, et al. Pharmacogenetic assessment of clinical outcome in patients with metastatic breast cancer treated with docetaxel plus capecitabine. *J Cancer Res Clin Oncol.* 2012; 138: 1197–1203. <https://doi.org/10.1007/s00432-012-1183-5> PMID: 22426923
43. Richards-Waugh LL, Primerano DA, Dementieva Y, Kraner JC, Rankin GO. Fatal methadone toxicity: Potential role of CYP3A4 genetic polymorphism. *J Anal Toxicol.* 2014; 38: 541–547. <https://doi.org/10.1093/jat/bku091> PMID: 25217544
44. Liu BH. Statistical Genomics. *Methods Mol Biol.* 2016; 93–110. <https://doi.org/10.1007/978-1-4939-3578-9>
45. Samwald M, Blagec K, Hofer S, Freimuth RR. Analyzing the potential for incorrect haplotype calls with different pharmacogenomic assays in different populations: a simulation based on 1000 Genomes data. *Pharmacogenomics.* 2015; 16: 1713–1721. <https://doi.org/10.2217/pgs.15.108> PMID: 26419264
46. Cho SK, Oh ES, Park K, Park MS, Chung JY. The UGT1A3\*2 polymorphism affects atorvastatin lactonization and lipid-lowering effect in healthy volunteers. *Pharmacogenetics and Genomics.* 2012. pp. 598–605. <https://doi.org/10.1097/FPC.0b013e3283544085> PMID: 22555810
47. Hiratsuka M, Nozawa H, Katsumoto Y, Moteki T, Sasaki T, Konno Y, et al. Genetic polymorphisms and haplotype structures of the CYP4A22 gene in a Japanese population. *Mutat Res—Fundam Mol Mech Mutagen.* 2006; 599: 98–104. PMID: 16806293
48. Hildebrandt M a T, Carrington DP, Thomae B a, Eckloff BW, Schaid DJ, Yee VC, et al. Genetic diversity and function in the human cytosolic sulfotransferases. *Pharmacogenomics J.* 2007; 7: 133–143. <https://doi.org/10.1038/sj.tpj.6500404> PMID: 16801938
49. Mizzi C, Dalabira E, Kumuthini J, Dzimiri N, Balogh I, Başak N, et al. (2016) A European Spectrum of Pharmacogenomic Biomarkers: Implications for Clinical Pharmacogenomics. *PLoS ONE* 11(9): e0162866. <https://doi.org/10.1371/journal.pone.0162866> PMID: 27636550
50. Zhou Y, Ingelman-Sundberg M, Lauschke VM. (2017) Worldwide distribution of cytochrome P450 alleles: A meta-analysis of population-scale sequencing projects. *Clin Pharmacol Ther* <https://doi.org/10.1002/cpt.690> PMID: 28378927
