# Supplementary material for: Exploring public genomics data for population pharmacogenomics
Source: PLoS One. 2017 Aug 3;12(8):e0182138. doi: 10.1371/journal.pone.0182138 (PMC5542428; doi:10.1371/journal.pone.0182138)
Supplement: S1 File — (XLSX) [file pone.0182138.s001.xlsx]

## Sheet: Table A
Table 1: Haplotype and variant matches of all phramacogenes per population. Shaded cells represent number of matched haplotypes and white cells number of pharmacovariants.
	AFR														AMR								EAS										EUR										SAS
	ACB		ASW		ESN		GWD		LWK		MSL		YRI		CLM		MXL		PEL		PUR		CDX		CHB		CHS		JPT		KHV		CEU		FIN		GBR		IBS		TSI		BEB		GIH		ITU		PJL
ABCB1	2	1	2	1	2	1	2	1	2	1	2	1	2	1	2	1	2	1	2	1	2	1	2	1	2	1	2	1	2	1	2	1	2	1	2	1	2	1	2	1	2	1	2	1	2	1	2	1	2
ABCC2	9	16	9	16	8	13	10	18	8	13	9	15	9	15	10	18	7	14	8	15	11	20	5	11	6	13	5	9	5	9	7	14	8	16	8	14	8	14	10	18	9	16	8	16	9	17	8	14	7
ADRB1	3	2	3	2	3	2	3	2	3	2	3	2	3	2	3	2	3	2	3	2	3	2	3	2	3	2	3	2	3	2	3	2	3	2	3	2	3	2	3	2	3	2	3	2	3	2	3	2	3
ADRB2	3	4	3	4	3	4	3	4	3	4	3	4	3	4	3	4	3	4	3	4	3	4	3	4	3	4	3	4	3	4	3	4	4	4	3	4	3	4	3	4	3	4	3	4	3	4	3	4	3
APOE	3	2	3	2	3	2	3	2	3	2	3	2	3	2	3	2	3	2	3	2	3	2	3	2	3	2	3	2	3	2	3	2	3	2	3	2	3	2	3	2	3	2	3	2	3	2	3	2	3
BRCA1	3	5	4	6	3	5	4	6	3	5	3	5	3	5	4	6	2	1	2	1	4	6	1	0	1	0	1	0	1	0	1	0	3	2	2	1	3	2	4	5	5	8	2	1	2	1	3	2	3
CDA	6	13	6	13	4	4	7	15	6	13	9	20	7	15	7	16	7	16	7	16	8	18	6	13	6	13	6	13	6	13	6	13	8	18	7	16	7	16	7	16	8	18	7	17	6	13	7	16	6
CFTR	1	0	1	0	1	0	1	0	1	0	1	0	1	0	2	1	2	1	1	0	2	1	1	0	1	0	1	0	1	0	1	0	2	1	1	0	2	1	2	1	2	1	2	1	2	1	1	0	1
CHRNA5	3	2	3	2	2	1	3	2	3	2	3	2	2	1	3	2	3	2	3	2	3	2	3	2	3	2	3	2	3	2	3	2	3	2	3	2	3	2	3	2	3	2	3	2	3	2	3	2	3
COMT	3	6	3	6	3	6	3	6	3	6	3	6	3	6	3	6	3	6	3	6	3	6	3	6	3	6	3	6	3	6	3	6	3	6	3	6	3	6	3	6	3	6	3	6	3	6	3	6	3
CYP1A1	4	4	4	4	2	1	2	1	2	1	2	1	2	1	4	4	4	4	4	4	4	4	4	4	3	3	3	3	3	3	3	3	6	6	4	4	5	5	4	4	4	4	3	3	4	4	4	4	4
CYP1A2	3	7	3	7	2	5	3	7	5	13	2	5	2	5	3	7	3	7	3	7	3	7	3	7	3	7	4	9	3	7	3	7	3	7	3	7	3	7	4	7	3	7	4	7	3	7	3	7	3
CYP1B1	7	13	7	13	6	12	6	12	7	13	6	12	6	12	6	9	6	11	6	11	6	11	3	3	6	9	5	7	5	5	4	6	4	4	4	4	5	7	6	11	5	8	5	7	5	7	5	7	5
CYP2A13	3	2	2	1	3	2	2	1	2	1	2	1	2	1	3	2	2	1	2	1	2	1	2	1	2	1	2	1	4	3	2	1	2	1	2	1	3	2	2	1	3	2	2	1	1	0	3	2	2
CYP2A6	4	3	3	2	3	2	4	3	4	3	4	3	4	3	3	2	3	2	3	2	3	2	4	3	4	3	4	3	4	4	4	3	3	2	3	2	3	2	3	2	3	2	3	2	3	2	3	2	3
CYP2B6	3	2	3	2	1	1	2	1	2	1	1	1	1	1	3	2	2	1	3	2	3	2	1	0	2	1	2	1	3	2	3	2	3	2	3	2	3	2	3	2	3	2	3	2	3	2	3	2	3
CYP2C19	1	2	1	2	1	2	1	2	1	2	1	2	1	2	1	2	1	2	1	2	1	2	1	2	1	2	2	13	2	13	1	2	1	2	2	13	1	2	1	2	1	2	1	2	1	2	1	2	1
CYP2C8	2	1	1	0	2	1	1	0	1	0	1	0	2	1	2	1	2	1	2	1	2	1	1	0	1	0	1	0	1	0	1	0	2	1	2	1	2	1	2	1	2	1	2	1	2	1	2	1	2
CYP2C9	7	6	6	5	6	5	7	6	6	5	5	4	6	5	2	1	2	1	2	1	6	5	3	2	3	2	5	4	2	1	3	2	5	4	5	4	2	1	3	2	3	2	3	2	4	3	4	3	4
CYP2D6	3	3	4	4	3	3	3	3	3	3	2	2	3	3	4	4	3	3	2	2	4	4	3	5	4	6	2	2	3	5	3	5	4	4	6	6	4	4	5	5	5	5	5	6	4	5	5	6	6
CYP2E1	3	2	4	4	3	2	3	2	3	2	3	2	3	2	3	3	4	4	4	4	5	5	3	3	4	4	4	4	3	3	4	4	3	3	3	3	4	4	3	3	3	3	3	3	3	3	3	3	3
CYP2F1	3	2	3	2	3	2	3	2	3	2	3	2	3	2	3	2	3	2	3	2	3	2	2	1	3	2	2	1	2	1	2	1	3	2	3	2	3	2	3	2	3	2	3	2	3	2	3	2	3
CYP2R1	1	0	1	0	2	1	1	0	2	1	2	1	2	1	1	0	1	0	1	0	1	0	1	0	1	0	1	0	1	0	1	0	1	0	1	0	1	0	1	0	1	0	1	0	1	0	1	0	1
CYP2S1	1	0	1	0	1	0	1	0	1	0	1	0	1	0	1	0	1	0	1	0	1	0	1	0	1	0	1	0	1	0	1	0	1	0	1	0	1	0	1	0	1	0	1	0	1	0	1	0	1
CYP2W1	2	1	2	1	2	1	2	1	2	1	2	1	2	1	3	2	3	2	3	2	3	2	3	2	3	2	3	2	3	2	3	2	2	1	2	1	2	1	2	1	2	1	3	2	2	1	2	1	3
CYP3A4	4	7	2	1	1	0	2	5	2	1	2	5	2	1	3	2	3	2	3	2	4	3	3	2	3	2	4	4	2	1	3	2	4	3	4	3	3	2	4	3	3	2	2	1	3	2	4	3	2
CYP3A43	2	1	2	1	2	1	2	1	2	1	2	1	2	1	2	1	2	1	2	1	2	1	2	1	2	1	1	0	1	0	1	0	2	1	2	1	2	1	2	1	2	1	2	1	2	1	2	1	2
CYP3A5	4	3	4	3	4	3	4	3	4	3	4	3	4	3	3	2	3	2	4	3	4	3	2	1	2	1	2	1	2	1	2	1	2	1	2	1	2	1	3	2	3	2	2	1	2	1	2	1	2
CYP3A7	2	1	2	1	2	1	2	1	2	1	2	1	2	1	2	1	2	1	2	1	2	1	2	1	2	1	2	1	2	1	2	1	2	1	2	1	2	1	2	1	2	1	2	1	2	1	2	1	2
CYP4A22	5	25	5	25	4	17	4	21	5	25	5	25	5	25	5	25	4	18	4	18	4	18	4	18	5	25	4	18	3	18	4	18	4	18	4	18	4	18	4	18	4	18	5	25	4	18	4	18	4
CYP4B1	4	6	4	6	4	6	3	2	4	6	4	6	4	6	5	7	4	6	5	7	6	10	4	6	4	6	5	9	5	9	4	6	4	6	4	6	4	6	5	7	4	6	4	6	4	6	5	9	4
CYP4F2	2	1	2	1	2	1	2	1	2	1	2	1	2	1	2	1	2	1	2	1	2	1	2	1	2	1	2	1	2	1	2	1	2	1	2	1	2	1	2	1	2	1	2	1	2	1	2	1	2
DDC	5	12	5	12	5	12	4	9	4	9	4	9	5	12	5	12	5	12	5	12	5	12	4	11	5	12	5	12	5	12	5	12	5	12	5	12	5	12	5	12	5	12	5	12	5	12	5	12	5
DPYD	3	2	4	3	4	3	4	3	3	2	4	3	4	3	4	3	4	3	4	3	4	3	4	3	3	2	4	3	4	3	4	3	5	4	6	6	4	3	4	3	5	4	4	3	5	4	4	3	5
G6PD	3	3	3	3	3	3	4	5	3	3	3	3	3	3	3	3	2	2	2	1	4	5	2	1	2	1	1	0	1	0	2	1	1	0	1	0	2	1	2	1	2	1	2	1	2	1	2	1	3
HMGCR	2	2	2	2	2	2	2	2	2	2	2	2	2	2	2	2	2	2	2	2	2	2	1	0	1	0	1	0	1	0	1	0	2	2	2	2	2	2	2	2	2	2	1	0	1	0	1	0	1
HTR2C	3	4	3	4	3	4	2	4	3	4	2	4	2	4	3	4	3	4	3	4	3	4	3	4	3	4	2	2	3	4	3	4	3	4	3	4	3	4	3	4	3	4	3	4	3	4	3	4	3
IGFBP3	5	10	5	10	6	13	5	10	6	12	5	10	5	10	5	10	5	9	5	10	5	9	3	5	3	5	5	9	2	4	3	5	5	9	4	8	5	9	5	9	5	9	5	9	5	9	4	8	5
LDLR	5	6	6	8	4	5	5	6	6	8	4	5	4	5	6	8	6	8	6	8	6	8	4	4	5	6	5	6	4	4	5	6	6	8	6	8	6	8	6	8	6	8	6	8	6	8	6	8	6
NAT1	6	9	4	6	4	5	5	6	4	5	4	5	4	5	5	7	4	4	3	3	6	9	3	3	3	3	3	3	3	3	2	2	6	8	5	7	6	8	6	8	5	7	3	3	3	3	3	3	4
NAT2	1	2	2	3	1	2	1	2	1	2	1	2	1	2	1	2	1	2	1	2	1	2	0	NA	0	NA	1	2	0	NA	1	2	1	2	0	NA	0	NA	0	NA	1	2	1	2	0	NA	1	2	1
P2RY12	6	12	6	12	5	9	5	9	6	12	5	9	5	9	6	12	6	12	6	12	6	12	5	9	5	9	6	12	5	9	6	12	6	12	6	12	6	12	6	12	6	12	6	12	6	12	6	12	6
PIK3CA	5	10	5	10	5	10	5	10	5	10	5	10	5	10	5	10	5	10	5	10	5	10	5	10	5	10	5	10	5	10	5	10	5	10	5	10	5	10	5	10	5	10	5	10	5	10	5	10	5
SCN1A	3	2	3	2	4	4	4	4	3	2	3	2	4	4	3	2	3	2	3	2	3	2	3	2	3	2	3	2	4	4	3	2	3	2	3	2	3	2	3	2	3	2	3	2	3	2	3	2	4
SCN5A	1	0	1	0	1	0	1	0	1	0	1	0	1	0	1	0	1	0	1	0	1	0	1	0	1	0	1	0	1	0	1	0	1	0	1	0	1	0	1	0	1	0	1	0	1	0	1	0	1
SCNN1B	3	5	4	7	3	5	3	5	3	5	3	5	3	5	4	7	3	5	4	7	4	7	4	7	4	7	4	7	3	5	4	7	4	7	4	7	4	7	4	7	4	7	4	7	4	7	4	7	4
SLC22A1	3	2	3	2	1	0	1	0	1	0	1	0	1	0	3	2	3	2	3	2	3	2	1	0	1	0	1	0	1	0	1	0	3	2	3	2	3	2	3	2	3	2	3	2	2	1	2	1	2
SLC25A27	4	5	4	5	3	3	4	5	4	5	4	5	4	5	4	5	4	5	4	5	4	5	4	5	4	5	4	5	4	5	4	5	4	5	4	5	4	5	4	5	4	5	4	5	4	5	4	5	4
SLCO1B1	5	8	4	7	3	4	4	7	5	9	4	7	4	6	4	7	4	7	3	4	4	7	3	7	2	4	2	4	2	4	3	7	4	7	4	7	4	6	4	7	5	9	4	7	4	7	4	7	4
SULT1A2	3	3	3	3	3	3	3	3	3	3	3	3	3	3	3	3	3	3	3	3	3	3	2	2	3	3	3	3	2	2	3	3	3	3	3	3	3	3	3	3	3	3	3	3	3	3	3	3	3
SULT1C2	3	2	3	2	3	2	2	1	3	2	3	2	2	1	3	2	2	1	2	1	3	2	2	1	2	1	2	1	2	1	3	2	3	2	3	2	4	3	3	2	3	2	3	2	4	3	3	2	3
SULT2A1	4	3	3	2	3	2	3	2	2	1	3	2	3	2	2	1	1	0	1	0	2	1	1	0	1	0	1	0	1	0	1	0	1	0	1	0	1	0	1	0	1	0	1	0	1	0	1	0	1
SULT4A1	6	19	6	19	6	19	6	19	6	19	6	19	6	19	6	19	6	19	5	18	6	19	6	19	5	16	6	19	6	19	5	17	6	19	6	19	6	19	6	19	6	19	6	19	6	19	6	19	6
TPMT	3	2	3	2	4	3	4	3	3	2	2	1	3	2	3	2	2	1	3	2	2	1	2	1	3	2	2	1	2	1	2	1	2	1	2	1	2	1	2	1	3	2	2	1	3	2	2	1	2
UGT1A1	3	2	4	3	3	2	3	2	3	2	2	1	3	2	5	4	5	4	3	2	4	3	5	4	4	3	6	5	4	3	4	3	2	1	4	3	5	4	4	3	3	2	4	3	4	3	5	4	4
UGT1A10	3	4	4	5	3	4	3	4	4	6	3	4	3	4	4	5	3	2	2	1	2	1	1	0	2	1	1	0	2	1	1	0	2	1	2	1	2	1	2	1	2	1	2	1	1	0	2	1	1
UGT1A3	4	6	4	6	4	6	4	6	4	6	4	6	4	6	4	6	4	6	3	3	4	6	4	6	3	3	3	3	3	3	4	6	4	6	4	6	4	6	4	6	4	6	4	6	4	6	4	6	4
UGT1A3	6	47	6	46	4	26	4	26	4	26	4	26	4	26	8	58	8	58	4	27	8	58	5	27	4	17	4	17	4	17	5	27	8	58	7	57	8	58	6	38	8	58	9	59	6	46	6	46	7
UGT1A4	5	6	4	3	4	3	5	6	4	5	2	1	3	2	4	5	5	6	4	7	5	6	4	9	5	8	3	6	3	2	4	9	4	5	5	6	4	5	6	7	5	6	4	5	6	11	4	5	4
UGT1A5	1	0	1	0	1	0	1	0	1	0	1	0	1	0	1	0	1	0	1	0	1	0	1	0	1	0	1	0	1	0	1	0	1	0	1	0	1	0	1	0	1	0	2	1	1	0	1	0	2
UGT1A6	2	2	2	2	2	2	2	2	2	2	2	2	2	2	2	2	2	2	2	2	2	2	2	2	2	2	2	2	2	2	2	2	2	2	2	2	2	2	2	2	2	2	2	2	2	2	2	2	2
UGT1A7	3	7	3	7	3	7	3	7	2	3	3	7	3	7	2	3	2	3	2	3	2	3	2	3	2	3	2	3	2	3	2	3	2	3	2	3	2	3	2	3	2	3	2	3	2	3	2	3	2
UGT1A8	3	2	3	2	3	2	3	2	3	2	3	2	3	2	4	3	3	2	4	3	4	3	3	2	3	2	3	2	3	2	3	2	4	3	4	3	4	3	4	3	4	3	3	2	3	2	3	2	3
UGT1A9	3	5	4	8	3	5	3	5	3	5	3	5	3	5	4	8	4	8	4	8	4	8	3	5	5	9	3	5	5	7	3	5	4	8	4	8	4	8	4	8	4	8	4	8	3	5	4	8	3
UGT2B15	4	4	4	4	4	4	4	4	4	4	4	4	4	4	4	4	4	4	4	4	4	4	4	4	4	4	4	4	4	4	4	4	4	4	4	4	4	4	4	4	4	4	5	5	4	4	4	4	5
VKORC1	2	1	2	1	1	0	2	1	2	1	1	0	1	0	3	3	3	3	2	1	3	3	1	0	2	1	1	0	1	0	1	0	3	3	2	1	3	3	3	3	3	3	3	3	3	3	2	1	2
[truncated: 5 more columns]

## Sheet: Table B
Table 2: Haplotype and variant matches of all phramacogenes per population. Shaded cells represent number of matched haplotypes and white cells number of matched diplotypes. Red colour indicates actionable pharmacovariants
			AFR														AMR								EAS										EUR										SAS
			ACB		ASW		ESN		GWD		LWK		MSL		YRI		CLM		MXL		PEL		PUR		CDX		CHB		CHS		JPT		KHV		CEU		FIN		GBR		IBS		TSI		BEB		GIH		ITU
			192		122		198		226		198		170		216		188		128		170		208		186		206		210		208		198		198		198		182		214		214		172		206		204
ABCB1	*1		12	0	9	0	16	1	17	1	10	1	20	1	14	1	6	1	9	1	7	0	17	1	33	5	47	11	46	12	35	2	35	5	4	0	12	0	4	1	6	0	10	0	21	1	17	1	10
ABCB1	*2 (PMID: 12893986)	rs1045642	23	1	14	0	18	0	25	1	18	1	19	0	19	3	43	15	35	7	41	4	45	12	43	15	41	16	39	11	54	16	37	15	51	15	51	11	41	15	53	11	48	16	43	21	54	22	49
ABCB1	NM		31	62	21	39	32	65	38	71	24	71	29	50	31	72	41	33	34	17	44	35	56	32	48	11	42	11	41	19	47	18	44	21	55	29	51	31	45	30	53	40	48	38	40	12	55	17	53
ABCC2	H1		49	5	26	11	47	11	44	13	51	11	35	5	46	10	41	15	37	5	43	27	39	11	39	48	46	39	45	44	45	45	41	45	46	8	47	19	36	11	52	3	42	11	37	10	45	9	40
ABCC2	H10	rs1885301	6	0	1	0	10	0	20	0	6	0	6	0	7	0	4	0	0	0	1	0	2	0	0	0	0	0	0	0	0	0	0	0	0	0	0	0	1	0	1	0	0	0	0	0	0	0	0
ABCC2	H13,H11	rs2273697	0	0	0	0	0	0	1	0	0	0	0	0	0	0	1	0	0	0	0	0	1	0	0	0	0	0	0	0	0	0	1	0	2	0	1	0	2	0	2	0	1	0	3	0	12	0	6
ABCC2	H13,H11	rs3740066
ABCC2	H16	rs17222723	5	0	3	0	3	0	1	0	7	0	5	0	4	0	1	0	0	0	0	0	1	0	0	0	0	0	0	0	0	0	0	0	0	0	3	0	0	0	2	0	2	0	0	0	2	0	2
ABCC2	H2	rs1885301	6	0	3	0	9	1	5	0	6	0	1	0	6	0	29	1	23	1	11	1	31	4	27	4	36	5	32	7	30	5	33	7	34	0	37	3	31	4	36	3	38	3	24	3	14	0	6
ABCC2	H2	rs2804402
ABCC2	H2	rs3740066
ABCC2	H2	rs717620
ABCC2	H3	rs2273697	34	3	11	2	26	5	31	3	30	3	23	2	38	5	23	2	17	1	22	1	32	2	8	0	20	4	22	0	22	2	11	0	35	5	26	2	37	2	34	4	23	7	32	2	35	8	44
ABCC2	H4	rs1885301	9	2	13	1	11	0	18	1	10	1	23	1	12	0	22	4	26	1	19	2	24	2	7	0	6	0	7	0	6	0	5	0	19	2	22	3	20	3	23	3	26	3	20	1	40	2	34
ABCC2	H4	rs2804402
ABCC2	H4	rs3740066
ABCC2	H5	rs1885301	28	2	18	0	21	2	38	6	33	1	32	1	31	1	10	0	1	0	3	0	18	1	0	0	1	0	0	0	0	0	0	0	11	0	6	0	4	0	7	0	6	0	16	1	14	0	20
ABCC2	H5	rs2804402
ABCC2	H7	rs3740066	12	0	6	0	9	0	8	0	4	0	8	0	9	0	3	1	1	0	4	0	5	0	0	0	0	0	1	0	1	0	1	0	7	0	1	0	3	0	8	1	3	0	2	0	2	1	4
ABCC2	H9	rs1885301	1	0	1	0	0	0	1	0	0	0	0	0	0	0	3	0	1	0	1	0	2	0	1	0	1	0	0	0	0	0	1	0	1	0	0	0	0	0	4	0	0	0	1	0	1	0	0
ABCC2	H9	rs2804402
ABCC2	H9	rs717620
	H17	rs17222723	0	0	0	0	0	0	0	0	0	0	2	0	1	0	0	0	0	0	0	0	1	0	0	0	0	0	0	0	0	0	0	0	0	0	0	0	0	0	0	0	1	0	0	0	0	0	0
	H17	rs2273697
ABCC2	NM		14	2	12	0	20	2	13	0	19	0	11	3	26	2	5	0	6	0	4	0	12	0	0	0	0	0	1	0	0	0	1	0	13	0	1	0	8	0	17	0	22	1	3	0	1	0	0
ADRB1	H1		41	11	30	13	50	6	49	11	55	11	31	5	44	12	36	37	29	22	45	21	49	33	46	38	50	41	49	43	48	46	45	39	45	32	47	24	42	32	52	39	59	31	44	24	46	43	54
ADRB1	H2	rs1801253	47	20	27	9	45	24	63	20	39	11	40	18	59	22	29	9	16	3	14	2	36	6	38	0	34	5	42	4	32	3	34	5	37	14	43	12	34	10	45	6	56	9	39	7	39	4	40
ADRB1	H3	rs1801252	34	4	17	2	35	4	44	4	48	6	37	8	37	4	19	6	25	4	41	12	35	5	22	2	28	1	23	1	24	3	29	1	18	3	30	3	20	1	19	4	15	2	21	3	27	0	20
ADRB2	1		0	0	0	0	0	0	0	0	0	0	0	0	0	0	0	0	0	0	0	0	0	0	0	0	0	0	0	0	0	0	0	0	1	0	0	0	0	0	0	0	0	0	0	0	0	0	0
	2	rs1042713	43	10	30	5	54	9	46	17	43	8	39	13	45	15	40	4	35	7	39	17	35	2	45	7	45	13	54	9	48	28	49	13	22	8	37	3	30	2	33	4	43	4	48	10	42	14	43
		rs1042714
	3	rs1042713	25	3	13	1	22	1	24	1	40	1	16	0	22	2	39	2	14	2	17	3	56	14	19	0	22	0	8	1	10	1	11	0	47	22	53	10	50	11	55	18	56	14	26	2	41	3	26
APOE	E3		39	40	27	27	42	49	54	40	48	33	44	29	49	47	33	55	17	47	11	74	32	72	32	58	39	62	26	78	23	79	30	58	40	55	41	53	32	52	32	70	28	77	20	64	14	87	25
	E2	rs7412	22	1	14	1	10	0	26	2	9	0	22	1	22	0	14	1	6	0	1	0	10	0	17	1	22	0	16	0	10	0	28	3	13	0	14	0	12	1	12	0	10	0	7	1	6	1	8
	E4	rs429358	35	7	21	2	36	6	44	9	45	15	34	5	42	4	25	2	11	0	10	0	22	0	19	0	21	0	12	0	13	2	14	2	31	2	29	4	24	4	28	1	22	0	13	1	8	1	17
	NM		0	0	0	0	0	0	0	0	0	0	0	0	1	0	0	0	0	0	0	0	0	0	0	0	0	0	0	0	0	0	0	0	0	0	0	0	0	0	0	0	0	0	0	0	0	0	0
BRCA1	1		22	4	22	4	9	1	18	0	19	2	19	0	14	0	44	21	25	25	46	27	44	38	43	25	42	46	46	42	39	57	49	37	54	32	40	43	35	43	52	36	55	32	36	23	53	24	52
	10	rs1060915	0	0	0	0	0	0	0	0	0	0	0	0	0	0	0	0	0	0	0	0	0	0	0	0	0	0	0	0	0	0	0	0	0	0	0	0	0	0	4	0	0	0	0	0	0	0	0
	10	rs16941
	10	rs1799966
	5	rs4986852	0	0	2	0	0	0	1	0	0	0	0	0	0	0	5	0	0	0	0	0	9	0	0	0	0	0	0	0	0	0	0	0	8	0	1	0	2	0	7	1	8	0	0	0	0	0	1
	8	rs799917	45	34	32	14	39	57	57	45	46	42	42	34	44	58	12	1	4	0	4	0	11	2	0	0	0	0	0	0	0	0	0	0	1	0	0	0	1	0	1	0	5	0	4	0	6	0	9
	9	rs16942	7	1	12	0	8	0	4	1	18	2	11	0	10	1	3	0	0	0	0	0	4	0	0	0	0	0	0	0	0	0	0	0	0	0	0	0	0	0	0	0	2	0	0	0	0	0	0
	9	rs1799949
	9	rs1799966
	9	rs799917
	3	rs1060915	0	0	0	0	0	0	0	0	0	0	0	0	0	0	0	0	0	0	0	0	0	0	0	0	0	0	0	0	0	0	0	0	0	0	0	0	0	0	0	0	1	0	0	0	0	0	0
	3	rs1799966
	NM		30	5	18	0	22	2	44	5	17	3	24	3	24	3	40	20	25	12	48	9	36	12	43	25	42	15	46	17	39	8	49	13	45	13	41	15	36	11	50	13	49	15	40	23	51	24	56
CDA		rs1048977
	*10	rs3215400	0	0	0	0	0	0	4	0	0	0	2	0	2	0	0	0	0	0	0	0	0	0	0	0	0	0	0	0	0	0	0	0	0	0	0	0	0	0	0	0	0	0	0	0	0	0	0
	*10	rs532545
	*1A		41	6	23	5	39	5	45	8	32	3	44	4	41	4	47	22	41	12	44	20	54	15	52	31	51	25	44	38	61	26	48	28	43	17	49	18	45	12	54	16	53	15	35	22	45	26	51
	*1B	rs3215400	34	12	21	5	36	12	52	7	41	19	34	6	53	14	8	0	3	0	6	0	18	2	26	3	26	6	29	7	28	3	37	2	8	0	26	1	11	0	11	0	4	0	34	4	18	1	35
	*1C	rs1048977	35	4	27	4	37	10	50	7	31	6	39	1	43	6	18	1	16	0	2	2	22	3	20	0	25	7	21	2	15	0	23	2	33	2	33	5	35	1	26	3	24	5	14	0	25	3	26
	*1C	rs3215400
	*1D	rs1048977	17	3	7	0	21	1	19	0	18	2	11	1	20	1	14	0	2	0	9	0	12	0	4	0	4	0	2	0	3	0	6	0	6	0	3	0	3	0	8	0	8	0	6	0	7	0	2
	*1L	rs3215400	0	0	0	0	0	0	0	0	0	0	1	0	0	0	4	0	1	0	2	0	2	0	0	0	0	0	0	0	0	0	0	0	2	0	2	0	2	0	5	0	3	1	0	0	0	0	1
	*1L	rs532545
	*1L	rs602950
	*2A	rs1048977	5	0	5	0	0	0	3	0	7	0	4	0	4	0	17	1	23	1	32	8	16	0	9	2	16	1	10	0	34	2	17	0	19	3	15	0	22	1	18	1	20	0	13	1	21	2	24
	*2A	rs2072671
	*2A	rs3215400
	*2A	rs532545
	*2A	rs602950
	*2B	rs2072671	8	0	4	0	0	0	9	0	8	0	8	0	3	0	26	1	13	1	11	1	34	2	3	0	6	0	8	0	3	0	2	0	27	2	18	0	26	2	38	6	47	4	15	0	22	0	18
	*2B	rs3215400
	*2B	rs532545
	*2B	rs602950
	*2D	rs1048977	0	0	0	0	0	0	0	0	0	0	1	0	0	0	0	0	0	0	0	0	1	0	0	0	0	0	0	0	0	0	0	0	2	0	0	0	0	0	0	0	1	0	0	0	0	0	0
	*2D	rs2072671
	*1M	rs3215400
	*1M	rs532545
	*1M	rs602950
	NM		2	0	5	1	9	0	0	0	1	0	2	0	0	0	4	0	1	0	2	0	5	0	0	0	0	0	2	0	2	0	1	0	8	1	4	0	4	1	2	0	4	0	0	0	4	0	1
CFTR	Reference		96	0	61	0	99	0	113	0	99	0	85	0	108	0	91	0	62	0	85	0	102	0	93	0	103	0	105	0	104	0	99	0	95	0	99	0	89	0	106	0	105	0	83	0	102	0	102
	F508del(TCT)	rs199826652	0	0	0	0	0	0	0	0	0	0	0	0	0	0	3	0	2	0	0	0	2	0	0	0	0	0	0	0	0	0	0	0	4	0	0	0	2	0	1	0	2	0	3	0	1	0	0
CHRNA5	haplotype 1		46	30	28	20	48	33	44	50	48	36	45	25	48	36	41	21	30	23	19	62	49	24	35	55	45	54	35	60	34	68	48	39	33	4	38	8	34	5	46	2	38	10	43	26	45	25	44
	haplotype 2	rs680244	46	12	25	10	48	18	44	18	47	14	44	15	48	24	28	6	16	6	12	2	48	9	31	3	39	4	32	7	32	1	48	10	41	20	56	14	47	20	43	10	54	11	36	8	45	12	41
	haplotype 3	rs16969968	10	3	9	0	0	0	2	0	3	0	1	0	0	0	39	13	20	2	9	1	33	6	4	0	6	0	9	0	4	0	4	0	46	15	44	8	37	7	57	22	43	18	21	2	30	6	27
	NM		0	0	0	0	0	0	0	0	0	0	0	0	0	0	0	0	0	0	0	0	0	0	0	0	0	0	0	0	0	0	0	0	0	0	0	0	0	0	0	0	1	0	0	0	0	0	0
COMT	Haplotype high activity		28	1	20	0	20	1	30	3	21	3	13	1	21	2	46	9	23	4	17	4	46	18	34	11	51	11	41	11	50	11	39	16	47	20	35	9	39	17	57	17	58	21	35	9	44	12	45
	Haplotype intermediate activity	rs4633	36	9	19	6	35	7	33	9	43	7	29	1	36	9	46	11	34	8	45	7	51	16	34	7	40	11	37	8	42	7	35	6	46	23	45	36	43	26	48	25	55	21	45	15	44	22	59
	Haplotype intermediate activity	rs4680
	Haplotype intermediate activity	rs4818
	Haplotype intermediate activity	rs6269
	Haplotype low activity	rs4818	31	6	22	7	40	9	53	8	45	7	39	13	46	9	35	6	35	4	48	18	32	2	43	17	32	17	50	17	52	9	47	14	17	1	21	2	11	1	17	2	11	0	31	5	34	4	45
	Haplotype low activity	rs6269
	NM		39	13	21	7	39	15	56	7	35	10	45	7	53	10	7	1	4	0	2	0	7	0	5	0	5	0	10	0	10	0	5	0	0	0	3	0	1	0	4	0	6	0	3	0	8	0	7
CYP1A1	*1		39	51	24	32	32	62	41	68	32	63	33	45	36	64	49	35	26	24	35	3	37	58	38	21	56	30	51	37	51	45	48	32	26	72	26	72	27	64	24	77	27	79	44	29	42	50	45
	*2A	rs4646903	37	4	24	1	32	5	41	4	32	4	33	7	36	8	11	0	6	1	8	0	12	0	40	6	28	2	28	3	22	1	31	2	11	0	15	1	13	0	12	1	17	1	32	7	31	5	35
	*2B	rs1048943	2	0	7	0	0	0	0	0	0	0	0	0	0	0	39	7	25	9	42	39	24	3	39	7	37	9	35	8	37	3	39	6	7	0	10	0	6	0	4	0	7	0	20	2	20	1	21
	*2B	rs4646903
	*4	rs1799814	4	0	0	0	0	0	0	0	0	0	0	0	0	0	5	0	3	0	1	0	11	1	0	0	0	0	0	0	0	0	0	0	5	0	1	0	7	0	16	1	3	0	0	0	1	0	3
	*10	rs56240201	0	0	1	0	0	0	0	0	0	0	0	0	0	0	0	0	0	0	0	0	0	0	0	0	0	0	0	0	0	0	0	0	0	0	0	0	0	0	0	0	0	0	0	0	0	0	0
	*2C	rs1048943	0	0	0	0	0	0	0	0	0	0	0	0	0	0	0	0	0	0	0	0	0	0	1	0	0	0	0	0	0	0	0	0	1	0	0	0	0	0	0	0	0	0	0	0	0	0	0
	*5	rs41279188	0	0	0	0	0	0	0	0	0	0	0	0	0	0	0	0	0	0	0	0	0	0	0	0	0	0	0	0	0	0	0	0	4	0	0	0	1	0	0	0	0	0	0	0	0	0	0
	NM		0	0	0	0	0	0	0	0	0	0	0	0	0	0	0	0	0	0	0	0	0	0	0	0	3	0	0	0	0	0	0	0	0	0	0	0	0	0	0	0	0	0	0	0	0	0	0
CYP1A2	*1A		0	0	0	0	0	0	0	0	0	0	0	0	0	0	0	0	0	0	0	0	0	0	0	0	0	0	0	0	0	0	0	0	0	0	0	0	0	0	1	0	0	0	1	0	0	0	0
	*1B	rs2470890	38	16	30	7	46	24	52	21	52	25	45	14	53	23	34	8	17	8	19	2	45	8	33	6	46	13	51	11	48	17	42	5	38	8	37	11	34	7	46	15	49	16	40	16	50	24	47
	*1L	rs2069514	36	5	21	3	28	10	37	1	38	3	36	4	45	3	33	8	25	12	44	35	32	2	37	13	42	6	42	7	40	4	39	9	4	0	7	0	2	0	2	0	5	0	15	1	12	0	11
	*1L	rs2470890
	*1L	rs35694136
	*1L	rs762551
	*1M	rs2472304	13	2	15	0	0	0	4	0	1	0	0	0	0	0	40	17	20	7	18	1	55	22	27	1	21	1	30	3	36	4	31	1	43	44	44	34	36	42	50	38	50	30	26	3	21	4	22
	*1M	rs762551
	*17	rs149928755	0	0	0	0	0	0	0	0	1	0	0	0	0	0	0	0	0	0	0	0	0	0	0	0	0	0	0	0	0	0	0	0	0	0	0	0	0	0	0	0	0	0	0	0	0	0	0
	*17	rs2470890
	*17	rs2472304
	*17	rs762551
	*20	rs144148965	0	0	0	0	0	0	0	0	1	0	0	0	0	0	0	0	0	0	0	0	0	0	0	0	0	0	0	0	0	0	0	0	0	0	0	0	0	0	0	0	0	0	0	0	0	0	0
	*20	rs2470890
	*1G	rs2069526	0	0	0	0	0	0	0	0	0	0	0	0	0	0	0	0	0	0	0	0	0	0	0	0	0	0	1	0	0	0	0	0	0	0	0	0	0	0	0	0	0	0	0	0	0	0	0
	*1G	rs2470890
	NM		41	9	30	3	42	7	59	15	39	5	39	7	46	10	13	1	10	1	13	0	12	0	39	5	45	6	38	3	28	3	36	10	9	0	18	1	12	0	9	0	16	1	36	7	43	12	50
CYP1B1	*1		3	0	6	0	1	0	5	0	1	0	2	0	2	0	30	4	34	7	38	27	37	2	37	54	47	46	38	55	28	69	38	52	17	1	28	3	20	0	22	0	21	4	36	5	25	4	36
	*2	rs10012	25	4	19	5	27	2	33	1	36	2	15	3	23	1	32	20	25	3	35	5	31	5	27	0	39	4	32	6	17	0	34	0	36	9	46	16	36	8	38	7	40	4	42	13	47	21	58
	*2	rs1056827
	*3	rs1056836	40	23	27	7	45	24	53	15	55	12	42	11	44	22	33	6	31	3	21	1	43	12	13	0	15	0	14	0	18	2	13	1	47	19	36	9	39	17	59	19	55	15	16	3	29	4	28
	*4	rs1800440	5	0	2	0	0	0	0	0	1	0	0	0	0	0	16	3	8	1	6	0	34	7	0	0	2	0	1	0	2	0	0	0	29	5	30	1	32	2	30	4	41	5	26	1	34	4	25
	*5	rs10012	2	0	5	1	6	0	19	1	6	0	13	0	12	0	1	0	0	0	0	0	0	0	0	0	1	0	0	0	0	0	0	0	0	0	0	0	0	0	0	0	0	0	0	0	0	0	0
	*5	rs1056836
	*6	rs10012	38	6	21	4	40	8	51	10	45	9	45	8	45	15	4	0	1	0	1	0	10	0	0	0	2	0	3	0	0	0	7	0	0	0	0	0	1	0	2	0	0	0	7	0	2	0	1
	*6	rs1056827
	*6	rs1056836
	*7	rs10012	13	0	8	0	10	0	11	0	8	0	9	0	14	0	0	0	1	0	1	0	1	0	0	0	0	0	0	0	0	0	0	0	0	0	0	0	0	0	2	0	1	0	0	0	0	0	0
	*7	rs1056827
	*7	rs1056836
	*7	rs4986888
	*23	rs56175199	0	0	0	0	0	0	0	0	0	0	0	0	0	0	0	0	0	0	0	0	0	0	0	0	0	0	0	0	1	0	0	0	0	0	0	0	0	0	0	0	0	0	0	0	0	0	0
	NM		0	0	0	0	1	0	0	0	0	0	0	0	0	0	6	0	0	0	2	0	0	0	1	0	0	0	0	0	0	0	0	0	1	0	0	0	0	0	1	0	0	0	1	0	3	0	0
CYP2A13	*1		30	56	22	38	42	47	42	68	36	50	34	42	38	60	10	84	2	62	3	82	13	90	15	77	17	86	12	93	13	90	12	86	2	97	5	94	3	88	3	104	10	96	3	83	2	101	10
	*6	rs138870349	1	0	0	0	1	0	0	0	0	0	0	0	0	0	0	0	0	0	0	0	0	0	0	0	0	0	0	0	1	0	0	0	0	0	0	0	0	0	0	0	0	0	0	0	0	0	0
	*7	rs72552266	0	0	0	0	0	0	0	0	0	0	0	0	0	0	2	0	0	0	2	0	0	0	0	0	0	0	0	0	1	0	0	0	2	0	2	0	1	0	1	0	4	1	0	0	0	0	1
	*8	rs112337232	12	0	9	0	12	2	14	0	18	0	15	3	13	1	2	0	2	0	0	0	2	0	3	0	2	0	1	0	3	0	1	0	0	0	0	0	1	0	0	0	1	0	1	0	0	0	3
	NM		27	5	13	1	33	6	32	1	32	6	23	4	33	5	6	0	0	0	1	0	11	1	14	0	15	0	11	0	8	1	11	1	0	0	3	0	1	0	2	0	5	0	2	0	2	0	6
CYP2A6	*1A		38	48	23	34	43	45	39	66	36	56	31	47	45	52	25	65	18	46	17	66	30	72	26	62	36	55	37	57	22	63	31	60	24	74	39	58	22	63	24	81	33	73	24	58	33	62	34
	*11	rs28399447	0	0	0	0	0	0	0	0	0	0	0	0	0	0	0	0	0	0	0	0	0	0	1	0	2	0	2	0	0	0	3	0	0	0	0	0	0	0	0	0	0	0	0	0	0	0	0
	*18A,*18	rs1809810	1	0	0	0	0	0	1	0	1	0	3	0	1	0	2	0	2	0	2	0	3	0	2	0	2	0	1	0	2	0	2	1	1	0	4	0	4	0	3	0	3	0	2	0	3	0	3
	*23	rs56256500	9	0	1	0	9	0	1	0	2	0	1	0	3	0	0	0	0	0	0	0	0	0	0	0	0	0	0	0	0	0	0	0	0	0	0	0	0	0	0	0	0	0	0	0	0	0	0
	*9	rs28399433	10	1	11	1	17	1	13	0	15	1	12	0	16	3	17	0	13	0	16	0	17	2	23	5	35	10	33	11	22	17	26	7	10	0	28	0	6	1	10	1	14	0	20	3	27	6	17
	*13	rs28399433	0	0	0	0	0	0	0	0	0	0	0	0	0	0	0	0	0	0	0	0	0	0	0	0	0	0	0	0	2	0	0	0	0	0	0	0	0	0	0	0	0	0	0	0	0	0	0
	*13	rs28399434
	NM		30	3	17	0	29	4	28	6	26	2	19	5	35	3	10	2	3	0	3	0	10	0	0	0	1	0	1	0	0	0	0	0	15	0	11	0	18	2	11	1	18	0	4	0	7	0	14
CYP2B6	*1		6	0	3	1	0	0	1	0	3	0	0	0	0	0	11	5	13	1	8	1	26	2	38	3	39	11	50	9	52	5	41	6	38	7	34	5	32	7	34	9	29	7	23	1	17	1	26
	*1G	rs4802101	17	1	6	1	28	2	26	4	12	0	19	1	19	0	4	0	0	0	2	0	4	0	0	0	1	0	2	0	6	0	2	0	5	0	5	1	8	0	2	0	4	0	1	0	2	0	1
	*5,*5A	rs3211371	1	0	4	0	0	0	0	0	0	0	0	0	0	0	11	0	11	0	4	0	18	0	0	0	0	0	0	0	1	0	1	0	17	1	25	2	17	1	19	0	20	1	11	0	14	0	14
	NM		24	71	13	46	28	69	27	82	13	85	19	65	19	89	22	65	22	40	12	71	44	56	38	52	38	53	50	45	55	42	44	49	54	34	48	35	43	33	45	48	49	48	33	51	31	70	39
CYP2C19	*1B	rs17885098	6	1	9	0	8	0	18	1	10	0	11	0	11	0	9	0	5	0	2	0	13	1	4	0	5	0	7	0	2	0	4	0	6	0	7	0	7	0	10	1	15	1	2	0	4	0	1
	*1B	rs3758581
	*2C	rs12571421	0	0	0	0	0	0	0	0	0	0	0	0	0	0	0	0	0	0	0	0	0	0	0	0	0	0	1	0	2	0	0	0	0	0	10	0	0	0	0	0	0	0	0	0	0	0	0
	*2C	rs12769205
	*2C	rs17885098
	*2C	rs181297724
	*2C	rs28399513
	*2C	rs3758580
	*2C	rs3758581
	*2C	rs4244285
	*2C	rs4417205
	*2C	rs4986894
	*2C	rs7916649
	NM		6	89	9	52	8	91	18	94	10	89	11	74	11	97	9	85	5	59	2	83	13	90	4	89	5	98	8	97	4	100	4	95	6	93	17	82	7	84	10	96	15	91	2	84	4	99	1
CYP2C8	*1A		33	55	20	40	33	62	42	65	21	75	23	59	32	70	23	70	16	48	7	78	34	66	0	93	0	103	1	104	0	104	0	99	25	70	28	69	23	65	43	61	30	73	4	82	9	93	9
	*4	rs1058930	2	0	0	0	2	0	0	0	0	0	0	0	1	0	3	0	3	0	2	0	5	0	0	0	0	0	0	0	0	0	0	0	7	0	12	2	11	0	14	0	10	0	1	0	2	0	2
	NM		33	7	20	1	31	4	42	6	21	3	23	3	31	6	20	1	13	0	5	0	31	3	0	0	0	0	1	0	0	0	0	0	20	3	16	0	16	1	31	2	22	3	3	0	7	1	7
CYP2C9	*1		31	60	22	37	36	57	23	89	39	54	17	68	40	62	31	61	16	48	6	79	35	65	7	86	10	93	11	93	5	99	7	91	30	61	29	69	23	65	35	65	45	58	22	61	34	65	23
	*11	rs28371685	3	0	1	0	2	0	7	0	3	0	3	0	9	1	0	0	0	0	0	0	0	0	0	0	0	0	0	0	0	0	0	0	0	0	2	0	0	0	0	0	0	0	0	0	0	0	1
	*12	rs9332239	0	0	0	0	0	0	0	0	0	0	0	0	0	0	0	0	0	0	0	0	1	0	0	0	0	0	0	0	0	0	0	0	1	0	0	0	0	0	0	0	2	0	0	0	0	0	0
	*13	rs72558187	0	0	0	0	0	0	0	0	0	0	0	0	0	0	0	0	0	0	0	0	0	0	1	0	0	0	0	0	1	0	1	0	0	0	0	0	0	0	0	0	0	0	0	0	0	0	0
	*14	rs72558189	0	0	0	0	0	0	0	0	0	0	0	0	0	0	0	0	0	0	0	0	0	0	1	0	0	0	0	0	0	0	0	0	0	0	0	0	0	0	0	0	0	0	4	0	2	0	2
	*2	rs1799853	5	0	5	0	0	0	1	0	0	0	0	0	0	0	23	0	13	0	4	0	25	2	0	0	0	0	1	0	0	0	0	0	22	4	16	0	14	1	24	3	27	3	3	0	8	1	5
	*29	rs182132442	0	0	0	0	0	0	0	0	0	0	0	0	0	0	0	0	0	0	0	0	0	0	0	0	1	0	1	0	0	0	1	0	0	0	1	0	0	0	0	0	0	0	0	0	0	0	0
	*5	rs28371686	3	0	3	0	5	0	2	0	2	0	1	0	5	0	0	0	0	0	0	0	1	0	0	0	0	0	0	0	0	0	0	0	0	0	0	0	0	0	0	0	0	0	0	0	0	0	0
	*6	rs9332131	1	0	0	0	4	0	2	0	0	0	0	0	4	0	0	0	0	0	0	0	0	0	0	0	0	0	0	0	0	0	0	0	0	0	0	0	0	0	0	0	0	0	0	0	0	0	0
	*8	rs7900194	16	0	4	0	15	0	4	0	14	0	6	0	11	0	0	0	0	0	0	0	1	0	0	0	0	0	0	0	0	0	0	0	1	0	0	0	0	0	1	0	0	0	0	0	0	0	0
	*9	rs2256871	10	1	10	0	20	1	7	0	25	2	6	0	18	1	0	0	0	0	0	0	0	0	0	0	0	0	0	0	0	0	0	0	1	0	0	0	0	0	0	0	0	0	0	0	0	0	0
	*16	rs72558192	0	0	0	0	0	0	0	0	0	0	0	0	0	0	0	0	0	0	0	0	0	0	0	0	1	0	0	0	0	0	0	0	0	0	0	0	0	0	0	0	0	0	0	0	0	0	0
	*3	rs1057910	0	0	0	0	0	0	0	0	0	0	0	0	0	0	0	0	0	0	0	0	0	0	0	0	0	0	1	0	0	0	0	0	0	0	0	0	0	0	0	0	0	0	0	0	0	0	0
	*31	rs57505750	0	0	0	0	0	0	0	0	2	0	0	0	0	0	0	0	0	0	0	0	0	0	0	0	0	0	0	0	0	0	0	0	0	0	0	0	0	0	0	0	0	0	0	0	0	0	0
	*44	rs200965026	0	0	0	0	0	0	0	0	0	0	0	0	0	0	0	0	0	0	0	0	1	0	0	0	0	0	1	0	0	0	0	0	0	0	0	0	0	0	0	0	0	0	0	0	0	0	0
	*45	rs199523631	0	0	0	0	0	0	0	0	0	0	0	0	0	0	0	0	0	0	0	0	0	0	0	0	0	0	0	0	0	0	0	0	0	0	1	0	0	0	0	0	0	0	0	0	0	0	0
	*7	rs67807361	0	0	0	0	0	0	0	0	0	0	0	0	0	0	0	0	0	0	0	0	0	0	0	0	0	0	0	0	0	0	0	0	0	0	0	0	0	0	0	0	0	0	0	0	1	0	0
	NM		1	0	3	0	0	0	2	0	1	0	1	0	1	0	12	0	3	0	2	0	10	0	5	0	8	0	7	1	4	0	7	0	13	0	11	0	13	0	18	0	16	1	21	0	27	1	19
CYP2D6	*1		35	15	25	12	39	12	50	10	31	6	27	5	37	12	33	28	27	24	37	33	57	12	28	7	30	8	34	8	50	27	33	3	41	18	47	21	30	20	54	17	40	18	42	16	49	14	46
	*14	rs1135840	0	0	0	0	0	0	0	0	0	0	0	0	0	0	0	0	0	0	0	0	0	0	3	0	1	0	0	0	1	0	5	0	0	0	0	0	0	0	0	0	0	0	0	0	0	0	0
	*14	rs16947
	*14	rs5030865
	*2,*2D	rs1135840	19	0	17	2	25	3	32	4	27	11	18	7	24	5	20	6	20	3	30	10	35	3	6	0	24	1	14	2	19	4	12	2	20	4	33	8	25	5	36	4	28	4	22	2	41	10	40
	*2,*2D	rs16947
	*22	rs138100349	0	0	0	0	0	0	0	0	0	0	0	0	0	0	0	0	0	0	0	0	0	0	0	0	0	0	0	0	0	0	0	0	0	0	1	0	1	0	0	0	1	0	0	0	0	0	0
	*33	rs28371717	0	0	0	0	0	0	0	0	0	0	0	0	0	0	0	0	0	0	0	0	2	0	0	0	1	0	0	0	0	0	0	0	1	0	1	0	0	0	1	0	3	0	0	0	0	0	0
	*43	rs28371696	3	0	1	0	2	0	2	1	7	0	0	0	2	0	1	0	0	0	0	0	0	0	0	0	0	0	0	0	0	0	0	0	0	0	1	0	0	0	1	0	0	0	2	1	0	0	2
	*7	rs5030867	0	0	0	0	0	0	0	0	0	0	0	0	0	0	0	0	0	0	0	0	0	0	0	0	0	0	0	0	0	0	0	0	0	0	0	0	0	0	0	0	0	0	2	0	3	0	1
	*86	rs201830078	0	0	0	0	0	0	0	0	0	0	0	0	0	0	0	0	0	0	0	0	0	0	0	0	0	0	0	0	0	0	0	0	0	0	0	0	0	0	0	0	0	0	5	0	4	0	6
	*86	rs77913725
	*9	rs5030656	0	0	1	0	0	0	0	0	0	0	0	0	0	0	3	0	1	0	0	0	5	0	0	0	0	0	0	0	0	0	0	0	2	1	3	0	7	0	5	0	7	0	0	0	0	0	0
	NM		39	33	32	9	46	28	46	33	45	27	35	33	51	34	35	14	22	2	15	1	49	15	31	52	44	44	42	50	46	15	44	47	50	19	40	7	33	18	45	15	51	20	37	12	41	10	43
CYP2E1	*1		29	6	27	6	28	2	42	4	29	2	23	2	33	4	39	50	24	31	36	42	41	45	44	29	43	37	49	41	54	36	46	37	36	61	21	76	22	68	29	75	39	64	26	57	28	73	32
	*1B	rs2070676	41	34	32	10	46	30	49	37	45	46	35	31	50	28	21	0	11	3	13	3	38	4	40	7	35	2	30	3	36	3	34	0	23	0	9	1	15	1	19	0	28	0	26	1	24	1	31
	*2	rs72559710	0	0	0	0	0	0	0	0	0	0	0	0	0	0	0	0	0	0	0	0	0	0	0	0	1	0	1	0	0	0	1	0	0	0	0	0	0	0	0	0	0	0	0	0	0	0	0
	*4	rs6413419	5	0	4	0	14	1	6	0	10	0	8	1	16	0	0	0	1	0	1	0	3	0	0	0	0	0	0	0	0	0	0	0	0	0	0	0	0	0	0	0	0	0	0	0	0	0	0
	*5B	rs2031920	0	0	2	0	0	0	0	0	0	0	0	0	0	0	21	0	17	1	23	2	12	0	24	3	26	11	29	6	32	4	35	4	12	0	6	1	5	0	5	0	11	0	2	0	2	0	2
	*5B	rs3813867
	*3	rs55897648	0	0	0	0	0	0	0	0	0	0	0	0	0	0	0	0	0	0	0	0	1	0	0	0	0	0	0	0	0	0	0	0	0	0	0	0	1	0	0	0	0	0	0	0	0	0	0
	NM		33	2	23	1	32	6	33	7	18	0	30	3	47	3	7	0	3	1	3	0	15	0	0	0	1	0	1	0	0	0	0	0	5	0	6	0	1	0	9	1	8	0	2	0	2	1	1
CYP2F1	*1		48	11	31	12	47	18	58	31	45	6	35	14	56	15	45	27	33	19	34	12	51	26	35	49	45	52	34	60	35	61	47	42	54	36	54	26	36	40	48	50	62	35	38	26	48	42	43
	*2	rs3833221	36	20	27	11	41	23	50	16	48	22	40	17	57	22	26	4	16	1	18	1	42	8	36	7	43	5	31	10	27	6	42	9	33	3	40	5	24	1	27	2	29	3	29	10	29	3	36
	*5	rs144315434	30	0	8	0	18	0	15	1	26	1	16	0	16	1	9	0	5	0	3	0	11	0	0	0	1	0	0	0	0	0	0	0	9	0	5	0	6	1	15	1	25	1	7	0	10	0	15
	NM		12	2	10	0	8	1	7	0	21	0	15	1	11	0	38	4	22	6	37	26	30	3	3	0	3	0	5	0	12	0	7	0	20	2	25	6	22	5	16	1	18	1	20	3	25	2	18
CYP2R1	*1		96	0	61	0	96	0	113	0	98	0	83	0	107	0	94	0	64	0	85	0	104	0	93	0	103	0	105	0	104	0	99	0	99	0	99	0	91	0	107	0	107	0	86	0	103	0	102
CYP2R1	*2	rs61495246	0	0	0	0	3	0	0	0	1	0	2	0	1	0	0	0	0	0	0	0	0	0	0	0	0	0	0	0	0	0	0	0	0	0	0	0	0	0	0	0	0	0	0	0	0	0	0
CYP2S1	*1A		7	88	2	59	5	94	2	111	9	89	0	85	4	104	2	92	6	58	1	84	6	98	0	93	0	103	0	105	0	104	0	99	7	92	5	93	3	88	4	103	5	102	5	81	5	98	2
CYP2S1	NM		7	1	2	0	5	0	2	0	9	1	0	0	4	0	2	0	6	0	1	0	6	0	0	0	0	0	0	0	0	0	0	0	7	0	5	1	3	0	4	0	5	0	5	0	5	0	2
CYP2W1	*1A		23	72	19	39	25	72	24	87	27	67	16	68	28	78	40	45	33	17	40	14	36	56	45	32	46	45	48	45	56	31	40	47	34	61	42	45	41	42	32	69	46	54	23	62	27	73	27
	*4	rs78873069	0	0	0	0	0	0	0	0	0	0	0	0	0	0	2	0	2	0	3	1	9	0	14	0	9	0	10	0	6	0	7	0	0	0	0	0	0	0	0	0	0	0	1	0	0	0	0
	*6	rs3808348	12	1	11	3	11	1	15	0	17	1	8	0	14	0	30	3	28	10	32	12	22	4	39	11	34	10	46	5	55	13	29	11	27	3	44	8	35	5	32	3	34	3	20	1	21	3	21
	NM		11	0	8	0	16	0	13	0	16	1	10	0	16	1	18	1	11	0	29	6	17	2	2	0	7	0	6	0	3	0	4	1	9	0	6	0	12	0	6	0	18	1	2	0	6	0	8
CYP3A4	*1		22	2	21	2	5	0	16	1	9	0	2	1	13	1	43	41	27	25	42	13	43	40	38	40	48	43	44	51	49	49	44	36	24	72	30	68	27	60	31	72	27	77	39	33	47	43	45
	*10	rs4986908	0	0	0	0	0	0	0	0	0	0	0	0	0	0	0	0	0	0	0	0	1	0	0	0	0	0	0	0	0	0	0	0	1	0	0	0	3	0	1	0	0	0	0	0	0	0	1
	*1B	rs2740574	1	0	1	0	0	0	0	0	0	0	0	0	1	0	0	0	0	0	0	0	0	0	0	0	0	0	0	0	0	0	0	0	0	0	0	0	0	0	0	0	0	0	0	0	0	0	0
	*1G	rs2242480	0	0	0	0	0	0	0	0	1	0	0	0	0	0	15	1	15	2	33	17	4	0	4	0	1	0	5	0	1	0	4	0	0	0	0	0	0	0	2	0	0	0	1	0	3	0	4
	*2	rs55785340	0	0	0	0	0	0	0	0	0	0	0	0	0	0	0	0	0	0	0	0	0	0	0	0	0	0	0	0	0	0	0	0	0	0	2	0	0	0	0	0	0	0	0	0	0	0	0
	*22	rs35599367	1	0	0	0	0	0	0	0	0	0	0	0	0	0	1	0	1	0	2	0	9	0	0	0	0	0	0	0	0	0	0	0	9	0	7	0	13	1	8	0	8	0	0	0	1	0	1
	*23	rs2242480	1	0	0	0	0	0	2	0	0	0	1	0	0	0	0	0	0	0	0	0	0	0	0	0	0	0	0	0	0	0	0	0	0	0	0	0	0	0	0	0	0	0	0	0	0	0	0
	*23	rs2687116
	*23	rs2740574
	*23	rs3735451
	*23	rs57409622
	*4	rs55951658	0	0	0	0	0	0	0	0	0	0	0	0	0	0	0	0	0	0	0	0	0	0	0	0	0	0	1	0	0	0	4	0	0	0	0	0	0	0	0	0	0	0	0	0	0	0	0
	*5	rs55901263	0	0	0	0	0	0	0	0	0	0	0	0	0	0	0	0	0	0	0	0	0	0	1	0	1	0	0	0	0	0	0	0	0	0	0	0	0	0	0	0	0	0	0	0	0	0	0
	*7	rs56324128	0	0	0	0	0	0	0	0	0	0	0	0	0	0	0	0	0	0	0	0	0	0	0	0	0	0	0	0	0	0	0	0	0	0	1	0	0	0	0	0	1	0	0	0	0	0	0
	*18B	rs2242480	0	0	0	0	0	0	0	0	0	0	0	0	0	0	0	0	0	0	0	0	0	0	0	0	0	0	1	0	0	0	0	0	0	0	0	0	0	0	0	0	0	0	0	0	0	0	0
	*18B	rs28371759
	*3	rs4986910	0	0	0	0	0	0	0	0	0	0	0	0	0	0	0	0	0	0	0	0	0	0	0	0	0	0	0	0	0	0	0	0	3	0	0	0	0	0	0	0	0	0	0	0	0	0	0
	NM		25	69	22	37	5	94	18	94	10	89	3	81	12	94	31	7	25	3	27	3	39	16	39	12	46	12	41	8	48	6	42	16	17	0	20	1	15	1	24	2	22	1	40	13	49	10	45
CYP3A43	*1		35	52	27	29	46	41	50	44	46	18	42	30	42	53	11	83	5	59	3	82	15	88	1	92	1	102	0	105	0	104	0	99	11	88	10	89	4	87	14	93	15	91	3	83	9	94	5
CYP3A43	*3	rs680055	35	9	27	5	46	12	50	19	46	35	42	13	42	13	11	0	5	0	3	0	15	1	1	0	1	0	0	0	0	0	0	0	11	0	10	0	4	0	14	0	15	1	3	0	9	0	5
CYP3A5	*1A		43	29	33	15	48	42	51	28	47	28	42	29	50	34	25	4	23	2	14	2	31	7	40	9	40	12	41	8	45	4	43	7	8	0	10	1	10	0	12	1	10	0	39	12	43	7	44
CYP3A5	*3C	rs776746	34	7	30	4	21	0	35	8	18	3	18	1	34	1	27	63	24	37	17	66	34	59	40	44	43	48	42	55	50	50	42	48	11	88	12	86	11	79	18	87	14	93	40	34	42	53	45
CYP3A5	*6	rs10264272	18	2	6	0	24	2	31	3	36	6	25	1	30	3	2	0	3	0	2	0	9	0	0	0	0	0	0	0	0	0	0	0	0	0	0	0	0	0	2	0	1	0	0	0	0	0	0
CYP3A5	*7	rs41303343	15	3	11	2	15	1	27	2	23	0	21	1	22	2	0	0	0	0	1	0	1	0	0	0	0	0	0	0	0	0	0	0	0	0	0	0	0	0	0	0	0	0	0	0	0	0	0
CYP3A5	NM		0	0	0	0	0	0	0	0	0	0	0	0	0	0	0	0	0	0	0	0	1	0	0	0	3	0	1	0	5	0	3	0	3	0	2	0	3	0	4	1	3	0	1	0	1	0	1
CYP3A7	*1A		52	15	35	14	38	17	42	22	51	8	44	5	53	15	25	66	22	39	18	65	31	62	40	44	41	50	42	56	45	55	44	48	9	90	11	87	10	80	17	88	18	89	40	33	42	55	45
CYP3A7	*2	rs2257401	52	29	35	12	38	44	42	49	51	40	44	36	53	40	25	3	22	3	18	2	31	11	40	9	41	12	42	7	45	4	44	7	9	0	11	1	10	1	17	2	18	0	40	13	42	6	45
CYP4A22	*1		13	0	20	2	1	0	10	0	17	0	4	0	5	0	42	28	30	19	42	13	54	26	7	0	1	0	4	0	0	0	8	0	48	32	44	34	34	40	51	34	46	38	34	7	40	17	37
CYP4A22	*12A	rs10789501	25	1	14	1	33	4	29	4	25	3	20	2	39	2	31	0	13	1	13	1	25	2	37	4	41	8	42	4	30	8	40	5	24	1	26	1	17	1	15	2	24	0	38	4	40	10	30
CYP4A22	*12A	rs12564525
CYP4A22	*12A	rs2056899
CYP4A22	*12A	rs2056900
CYP4A22	*12A	rs2405599
CYP4A22	*12A	rs4926581
CYP4A22	*13A	rs10789501	5	0	1	0	8	0	2	0	5	0	8	0	8	0	1	0	0	0	0	0	0	0	0	0	1	0	0	0	0	0	0	0	0	0	0	0	0	0	0	0	0	0	1	0	0	0	0
CYP4A22	*13A	rs12564525
CYP4A22	*13A	rs2056899
CYP4A22	*13A	rs2056900
CYP4A22	*13A	rs2405599
CYP4A22	*13A	rs4926581
CYP4A22	*13A	rs4926600
CYP4A22	*15	rs10789501	4	0	2	0	0	0	4	0	1	0	4	0	1	0	12	0	12	3	21	1	15	1	38	5	36	8	43	9	47	15	42	14	17	1	9	0	15	0	17	1	12	2	32	4	36	5	30
CYP4A22	*15	rs12564525
CYP4A22	*15	rs2056899
CYP4A22	*15	rs2056900
CYP4A22	*15	rs2405599
CYP4A22	*15	rs4926581
CYP4A22	*15	rs4926600
CYP4A22	*15	rs6661132
CYP4A22	*9	rs10789501	4	1	2	0	1	0	0	0	8	1	3	0	2	0	8	0	2	0	22	0	6	0	14	1	13	0	18	0	6	0	7	0	2	0	1	0	1	0	3	0	6	0	13	0	2	0	2
CYP4A22	*9	rs12564525
CYP4A22	*9	rs2056899
CYP4A22	*9	rs2405599
CYP4A22	NM		37	50	35	21	41	53	41	66	42	46	31	48	47	55	30	4	17	4	28	7	34	8	40	15	48	17	47	15	51	14	43	10	33	3	34	7	25	4	40	7	36	5	22	1	20	2	29
CYP4B1	*1		31	11	30	8	43	10	58	22	40	9	38	9	55	6	37	45	28	29	45	27	42	46	58	21	42	33	36	29	48	23	42	36	40	48	44	47	41	42	34	67	42	58	44	32	50	38	42
CYP4B1	*2A	rs2297809	9	0	13	0	10	0	0	0	8	0	2	0	9	0	21	5	15	2	38	2	28	2	23	1	42	13	43	10	37	15	30	1	23	2	27	2	22	4	20	1	19	1	24	0	14	0	19
CYP4B1	*2A	rs2297810
CYP4B1	*2A	rs3215983
CYP4B1	*2A	rs4646491
CYP4B1	*3	rs4646487	23	2	13	0	21	2	23	1	14	0	20	2	26	3	16	2	11	3	21	1	16	0	46	3	27	1	34	6	34	3	27	10	26	3	24	1	20	2	18	2	30	2	28	2	45	6	30
CYP4B1	*4	rs45467195	0	0	0	0	0	0	0	0	0	0	0	0	0	0	1	0	0	0	1	0	5	0	0	0	0	0	0	0	0	0	0	0	3	0	3	0	3	0	1	0	1	0	0	0	0	0	0
CYP4B1	*5	rs2297810	39	20	25	10	51	18	47	14	47	29	37	17	46	20	8	0	6	0	2	1	14	1	7	1	1	0	6	0	5	0	5	0	0	0	0	0	0	0	1	0	0	0	8	0	9	0	10
CYP4B1	*7,*2B	rs2297810	0	0	0	0	0	0	0	0	0	0	0	0	0	0	0	0	0	0	0	0	2	0	0	0	0	0	1	0	1	0	0	0	0	0	0	0	0	0	0	0	0	0	0	0	0	0	1
CYP4B1	*7,*2B	rs3215983
CYP4B1	*7,*2B	rs4646491
CYP4B1	NM		22	1	5	0	13	0	22	1	11	1	17	0	22	0	1	0	0	0	1	0	3	0	0	0	0	0	0	0	1	0	0	0	0	0	0	0	0	0	0	0	0	0	0	0	0	0	0
CYP4F2	*1		16	77	11	50	7	91	15	98	20	78	16	68	10	97	37	49	28	34	20	65	42	53	31	59	37	62	36	66	28	66	30	62	33	58	35	60	32	49	54	42	38	52	43	29	48	34	44
CYP4F2	*3	rs2108622	16	3	11	0	7	1	15	0	20	1	16	1	10	1	37	8	28	2	20	0	42	9	31	3	37	4	36	3	28	10	30	7	33	8	35	4	32	10	54	11	38	17	43	14	48	21	44
DDC	#1		32	2	29	2	35	9	52	14	40	8	38	5	39	3	47	26	37	18	43	19	48	21	42	24	38	21	50	18	55	13	47	18	48	14	50	10	36	10	49	20	47	15	36	9	37	12	46
DDC	#2	rs12718541	32	5	17	1	30	3	40	4	25	1	12	4	27	0	23	2	11	0	8	0	29	4	43	18	42	15	44	9	46	11	48	16	28	5	29	4	29	7	24	4	30	7	43	10	30	3	42
DDC	#2	rs1451371
DDC	#2	rs3735273
DDC	#2	rs3757472
DDC	#2	rs921451
DDC	#3	rs1451371	12	0	13	0	9	1	6	0	16	2	17	1	25	2	21	0	11	0	6	0	14	1	0	0	1	0	1	0	2	0	2	0	19	1	17	1	26	2	29	0	32	2	12	0	21	4	19
DDC	#4	rs12718541	35	1	13	2	28	1	29	2	31	8	21	6	31	3	11	2	9	0	11	3	23	0	7	0	13	0	19	1	21	1	16	1	22	1	5	0	11	2	18	5	22	1	10	0	13	2	16
DDC	#4	rs1451371
DDC	#4	rs3757472
DDC	#5	rs12718541	3	0	4	0	2	0	0	0	0	0	0	0	2	0	12	0	13	0	15	3	13	1	4	0	15	3	19	0	9	0	10	0	18	2	33	5	18	2	16	1	14	0	10	1	23	3	14
DDC	#5	rs1451371
DDC	#5	rs921451
DDC	NM		46	8	26	5	48	9	51	4	34	7	38	6	58	9	14	0	11	0	29	4	27	0	6	0	19	0	21	0	19	3	5	0	15	1	22	1	16	0	16	1	17	1	19	1	22	6	27
DPYD	*1		49	25	34	10	51	18	55	26	39	17	41	25	61	20	47	29	35	16	37	15	59	27	47	34	49	46	39	53	37	53	41	40	39	45	50	30	43	36	45	40	53	30	41	38	54	28	55
DPYD	*2A	rs3918290	0	0	1	0	0	0	0	0	0	0	0	0	0	0	0	0	0	0	0	0	0	0	0	0	0	0	0	0	0	0	0	0	1	0	0	0	0	0	0	0	1	0	0	0	3	0	0
DPYD	*5	rs1801159	16	0	8	0	17	4	11	0	24	1	10	0	15	2	23	2	22	1	39	17	25	4	37	2	41	5	25	10	35	8	37	9	26	1	16	2	24	2	28	4	31	7	12	1	17	0	4
DPYD	*6	rs1801160	0	0	0	0	1	0	3	0	0	0	2	0	2	0	11	0	6	0	2	0	6	0	1	0	0	0	3	0	2	0	2	0	9	0	5	0	6	0	4	0	6	0	7	0	7	1	11
DPYD	*9A	rs1801265	40	13	27	10	51	11	58	17	41	11	39	13	57	12	33	1	14	6	16	2	35	4	12	3	10	0	12	0	7	1	17	0	19	3	39	7	27	1	35	1	27	4	26	2	50	4	43
DPYD	*13	rs55886062	0	0	0	0	0	0	0	0	0	0	0	0	0	0	0	0	0	0	0	0	0	0	0	0	0	0	0	0	0	0	0	0	0	0	1	0	0	0	0	0	0	0	0	0	0	0	0
DPYD	*2B	rs1801159	0	0	0	0	0	0	0	0	0	0	0	0	0	0	0	0	0	0	0	0	0	0	0	0	0	0	0	0	0	0	0	0	0	0	3	0	0	0	0	0	0	0	0	0	0	0	0
DPYD	*2B	rs3918290
	NM		11	0	10	1	12	0	13	0	32	2	2	0	13	0	10	0	5	0	8	0	11	1	11	0	4	0	5	0	3	0	3	0	6	0	6	0	4	0	10	1	12	1	4	0	9	0	9
G6PD	B (wildtype)		46	7	29	9	35	12	41	5	41	7	33	5	44	9	51	35	35	21	43	28	66	30	49	30	56	45	57	42	56	45	50	34	50	42	41	54	45	39	63	40	54	44	41	9	60	19	64
	A	rs1050829	26	2	10	1	20	4	38	3	22	2	25	1	26	1	1	0	0	0	2	0	3	0	0	0	0	0	0	0	0	0	0	0	0	0	0	0	1	0	1	0	1	0	0	0	0	0	0
	A- 202A_376G	rs1050828	18	0	14	1	19	2	5	1	23	2	9	0	30	2	3	0	1	0	0	0	3	0	0	0	0	0	0	0	0	0	0	0	0	0	0	0	0	0	0	0	0	0	0	0	0	0	0
	A- 202A_376G	rs1050829
	A- 968C_376G	rs1050829	0	0	0	0	0	0	10	0	0	0	0	0	0	0	0	0	0	0	0	0	2	0	0	0	0	0	0	0	0	0	0	0	0	0	0	0	0	0	0	0	0	0	0	0	0	0	0
	A- 968C_376G	rs76723693
	Canton, Taiwan-Hakka, Gifu-like, Agrigento-like	rs72554665	0	0	0	0	0	0	0	0	0	0	0	0	0	0	0	0	0	0	0	0	0	0	4	0	1	0	0	0	0	0	1	0	0	0	0	0	0	0	0	0	0	0	0	0	0	0	0
	Kalyan-Kerala, Jamnaga, Rohini	rs137852339	0	0	0	0	0	0	0	0	0	0	0	0	0	0	0	0	0	0	0	0	0	0	0	0	0	0	0	0	0	0	0	0	0	0	0	0	0	0	0	0	0	0	1	0	2	0	2
	Mediterranean, Dallas, Panama' Sassari, Cagliari, Birmingham	rs5030868	0	0	0	0	0	0	0	0	0	0	0	0	0	0	0	0	0	0	0	0	0	0	0	0	0	0	0	0	0	0	0	0	0	0	0	0	0	0	0	0	0	0	0	0	0	0	0
	NM		54	15	31	8	52	18	60	27	58	16	45	23	58	17	51	6	34	8	43	13	60	7	51	11	57	1	57	6	56	3	49	15	50	7	41	4	44	7	62	4	55	8	42	35	58	24	66
HMGCR	H2		18	76	13	48	20	77	28	81	16	82	11	72	19	88	7	86	5	59	1	84	4	100	0	93	0	103	2	103	4	100	0	99	3	96	1	98	5	86	2	105	5	101	0	86	0	103	0
HMGCR	H7	rs17238540	14	1	11	0	19	2	28	4	15	1	9	2	18	1	7	0	5	0	1	0	3	0	0	0	0	0	0	0	0	0	0	0	3	0	1	0	4	0	2	0	5	1	0	0	0	0	0
HMGCR	H7	rs17244841
HMGCR	NM		6	0	2	0	1	0	0	0	1	0	2	0	1	0	0	1	0	0	0	0	1	0	0	0	0	0	2	0	4	0	0	0	0	0	0	0	1	0	0	0	0	0	0	0	0	0	0
HTR2C	1--2--1		3	0	3	0	1	0	0	0	5	0	0	0	0	0	17	0	14	0	16	0	15	0	19	2	22	0	25	1	14	1	22	1	23	1	25	0	21	0	21	2	21	1	28	6	23	3	39
HTR2C	2--1--1	rs3813929	50	14	32	10	48	12	54	9	47	14	47	11	48	11	51	25	31	11	45	19	66	19	49	33	52	42	56	37	62	35	58	34	57	17	50	36	50	17	53	31	54	27	39	21	58	25	57
HTR2C	2--1--1	rs518147
HTR2C	2--2--2	rs3813929	26	2	20	1	29	5	37	8	27	4	22	2	41	4	9	2	6	1	3	0	17	1	4	0	2	0	0	0	4	0	2	0	30	1	13	0	23	2	16	1	22	2	7	0	9	1	10
HTR2C	2--2--2	rs6318
HTR2C	NM		51	15	33	6	50	18	65	18	49	17	51	12	51	23	45	6	31	11	50	9	60	5	44	0	46	0	53	0	56	0	46	0	48	1	38	0	50	0	56	0	55	1	44	0	56	1	60
IGFBP3	1		50	9	23	8	32	20	44	11	32	9	42	5	55	13	38	15	21	4	20	3	39	12	40	49	34	60	40	57	39	55	26	65	45	11	48	12	35	17	49	15	51	29	42	13	48	7	45
IGFBP3	10	rs2854746	9	0	1	0	4	0	6	0	3	0	6	0	9	0	2	0	0	0	2	0	0	0	0	0	0	0	0	0	0	0	0	0	0	0	0	0	0	0	0	0	0	0	0	0	0	0	0
IGFBP3	10	rs3110697
IGFBP3	2	rs2854744	41	8	27	9	43	12	42	9	46	20	32	9	48	7	39	30	25	28	25	55	52	28	41	3	30	8	37	4	39	10	23	8	47	23	45	22	45	12	43	28	49	13	49	16	59	24	53
IGFBP3	2	rs2854746
IGFBP3	2	rs2960436
IGFBP3	2	rs3110697
IGFBP3	3	rs2854746	33	2	20	4	36	1	43	14	30	4	27	6	31	3	7	0	7	0	6	0	17	0	0	0	0	0	1	0	0	0	3	0	10	0	5	2	11	2	9	0	13	0	14	1	20	1	25
IGFBP3	4	rs2854744	16	0	5	0	9	0	12	0	11	0	13	0	15	1	12	0	9	0	1	0	15	1	0	0	0	0	2	0	0	0	0	0	23	2	23	2	27	0	21	1	12	2	2	1	14	0	11
IGFBP3	4	rs2854746
IGFBP3	4	rs2960436
IGFBP3	9	rs3110697	0	0	0	0	0	0	0	0	0	0	0	0	0	0	0	0	1	0	0	0	2	0	1	0	5	0	6	1	0	0	0	0	1	0	0	0	2	0	3	0	1	0	2	0	1	0	0
IGFBP3	5	rs2854744	0	0	0	0	1	0	0	0	0	0	0	0	0	0	0	0	0	0	0	0	0	0	0	0	0	0	0	0	0	0	0	0	0	0	0	0	0	0	0	0	0	0	0	0	0	0	0
IGFBP3	5	rs2960436
IGFBP3	5	rs3110697
IGFBP3	7	rs2854744	0	0	0	0	0	0	0	0	1	0	0	0	0	0	0	0	0	0	0	0	0	0	0	0	0	0	0	0	0	0	0	0	0	0	0	0	0	0	0	0	0	0	0	0	0	0	0
IGFBP3	7	rs2960436
	NM		5	0	4	0	7	0	11	0	7	1	10	0	8	1	0	0	1	0	0	0	1	0	0	0	1	0	0	0	0	0	0	0	0	0	1	0	0	0	1	0	0	0	1	0	0	0	0
LDLR	L5		32	5	13	3	27	4	33	1	38	8	23	3	43	3	19	0	16	2	22	1	11	1	13	1	26	2	30	3	22	2	22	1	4	0	5	0	3	0	8	0	13	0	16	3	31	5	25
	L1	rs2738467	12	0	15	0	0	0	2	0	3	0	0	0	0	0	49	13	39	5	46	18	48	13	41	3	27	5	30	2	32	2	41	5	46	16	49	17	40	17	50	10	53	16	32	11	43	12	52
	L2	rs14158	29	4	11	1	18	3	37	6	14	1	25	2	29	4	30	3	21	6	28	5	37	4	47	17	41	21	49	13	56	20	47	16	42	5	35	6	27	5	43	5	30	4	31	3	23	1	21
	L2	rs5742911
	L3	rs1433099	47	13	29	11	53	26	57	28	42	21	47	20	54	22	17	2	12	1	16	0	31	1	37	3	35	10	48	8	36	7	39	2	27	1	22	1	24	1	20	3	25	1	28	1	26	2	34
	L4	rs1433099	28	0	19	0	28	3	23	2	30	5	25	0	30	1	23	0	5	1	6	0	18	1	0	0	1	0	1	0	0	0	1	0	22	3	24	1	29	2	32	1	35	3	16	5	32	3	17
	L4	rs7254521
	L6	rs2738467	0	0	4	0	0	0	0	0	1	0	0	0	0	0	14	0	4	0	4	0	23	0	0	0	0	0	0	0	0	0	0	0	7	0	11	0	7	1	22	0	10	0	3	0	5	0	1
	L6	rs5742911
	NM		0	0	1	0	0	0	0	0	0	0	0	0	0	0	0	0	1	0	0	0	0	0	0	0	0	0	0	0	0	0	0	0	0	0	0	1	0	0	1	0	0	0	0	0	0	0	0
NAT1	*4		52	23	38	11	49	21	59	15	46	26	51	6	60	24	42	40	29	15	39	31	41	50	48	20	47	23	55	14	50	24	49	20	32	56	39	53	40	40	48	50	49	49	39	33	50	35	57
	*10	rs1057126	47	14	39	9	51	25	60	36	51	19	48	26	61	20	38	10	24	19	40	13	39	10	49	22	47	29	56	34	49	27	51	28	29	3	31	3	31	7	30	7	42	7	37	11	40	11	50
	*10	rs15561
	*14A	rs1057126	1	0	1	0	0	0	0	0	0	0	0	0	0	0	2	0	0	0	0	0	1	0	0	0	0	0	0	0	0	0	0	0	2	0	9	0	4	0	4	0	1	0	0	0	0	0	0
	*14A	rs15561
	*14A	rs4986782
	*14B,*14	rs4986782	0	0	0	0	0	0	0	0	0	0	0	0	0	0	0	0	0	0	0	0	0	0	0	0	0	0	0	0	0	0	0	0	0	0	0	0	0	0	0	0	0	0	0	0	0	0	0
	*15	rs5030839	1	0	0	0	0	0	1	0	0	0	0	0	0	0	1	0	1	0	1	0	0	0	0	0	0	0	0	0	0	0	0	0	1	0	0	0	0	0	6	0	2	0	0	0	0	0	0
	*17	rs56379106	0	0	1	0	0	0	0	0	0	0	0	0	0	0	0	0	0	0	0	0	0	0	0	0	0	0	0	0	0	0	0	0	4	0	0	0	1	0	0	0	0	0	0	0	0	0	0
	*22	rs56172717	0	0	0	0	0	0	0	0	0	0	0	0	0	0	0	0	0	0	0	0	1	0	0	0	0	0	0	0	0	0	0	0	0	0	2	0	0	0	3	0	0	0	0	0	0	0	0
	*27	rs4986991	9	0	0	0	2	0	1	0	3	0	1	0	2	0	0	0	0	0	0	0	1	0	0	0	0	0	0	0	0	0	0	0	0	0	0	0	0	0	0	0	0	0	0	0	0	0	0
	*27	rs4986992
	*3	rs15561	5	1	0	0	2	0	3	0	4	0	6	0	4	0	2	0	3	0	0	0	3	0	4	0	6	0	3	0	5	0	0	0	6	0	5	0	3	0	5	0	1	0	5	0	10	0	5
	*30	rs4987076	0	0	0	0	0	0	0	0	0	0	0	0	0	0	0	0	0	0	0	0	0	0	0	0	0	0	0	0	0	0	0	0	0	0	0	0	1	0	0	0	0	0	0	0	0	0	0
	NM		1	0	3	0	2	0	0	0	4	0	0	0	1	0	3	0	3	0	2	0	2	0	1	0	2	0	0	0	2	0	2	0	6	0	0	0	8	0	4	0	7	0	3	0	14	0	8
NAT2	*12J	rs1208	12	0	4	0	16	0	12	0	14	0	12	1	19	1	1	0	8	0	0	0	1	0	0	0	0	0	1	0	0	0	1	0	1	0	0	0	0	0	0	0	3	0	4	0	0	0	6
	*12J	rs72466456
	*12A,*12	rs1208	0	0	1	0	0	0	0	0	0	0	0	0	0	0	0	0	0	0	0	0	0	0	0	0	0	0	0	0	0	0	0	0	0	0	0	0	0	0	0	0	0	0	0	0	0	0	0
	*7B	rs1041983	0	0	0	0	0	0	0	0	0	0	0	0	0	0	0	0	0	0	1	0	0	0	0	0	0	0	0	0	0	0	0	0	0	0	0	0	0	0	0	0	0	0	0	0	0	0	0
	*7B	rs1799931
	NM		12	84	5	56	16	83	12	101	14	85	12	72	19	88	1	93	8	56	1	84	1	103	0	93	0	103	1	104	0	104	1	98	1	98	0	99	0	91	0	107	3	104	4	82	0	103	6
P2RY12	A		35	7	23	5	43	8	42	5	38	6	24	2	41	3	31	1	22	1	29	2	26	1	33	3	39	5	35	4	31	14	21	2	16	2	20	2	21	1	29	0	21	1	30	4	35	4	29
P2RY12	B	rs6801273	15	0	11	0	13	1	12	1	19	2	13	0	12	3	7	0	5	0	5	0	12	0	8	2	10	0	9	0	12	0	10	1	13	0	7	0	13	1	11	1	15	2	18	4	25	2	22
P2RY12	C	rs2046934	4	0	7	0	4	0	4	0	2	0	3	0	3	0	14	0	6	1	11	0	11	1	16	1	24	4	24	1	26	1	19	2	30	1	18	1	23	2	27	1	14	1	14	1	14	0	8
P2RY12	C	rs6798347
P2RY12	C	rs6801273
P2RY12	D	rs6798347	4	0	5	0	0	0	0	0	4	0	0	0	0	0	19	0	10	1	9	1	32	1	0	0	0	0	1	0	0	0	1	0	26	4	24	0	25	2	22	4	34	5	1	0	3	0	6
P2RY12	D	rs6801273
P2RY12	D	rs9859552
P2RY12	E	rs6787801	28	1	11	4	33	2	43	4	26	2	32	6	29	3	32	5	16	3	8	0	28	4	10	0	25	3	22	0	22	2	14	0	35	4	36	10	26	3	34	10	41	2	22	0	27	3	26
P2RY12	E	rs6798347
P2RY12	F	rs6787801	35	3	17	1	30	7	34	7	38	4	37	4	33	4	33	7	24	3	32	8	38	5	38	10	29	7	49	8	43	7	44	13	34	3	33	8	24	6	29	6	41	6	33	8	46	13	34
P2RY12	F	rs6798347
P2RY12	F	rs6801273
P2RY12	NM		37	6	24	2	29	5	47	5	33	5	27	5	42	15	24	1	17	5	36	9	29	4	29	10	29	6	40	2	24	1	37	8	16	0	16	1	18	1	18	0	14	0	18	1	12	0	9
PIK3CA	H1		15	2	17	3	15	0	18	2	13	0	16	1	17	1	41	16	29	13	50	27	50	14	36	53	32	63	39	57	33	66	39	50	49	17	42	37	52	11	53	18	55	12	40	23	51	15	39
PIK3CA	H2	rs2459693	15	3	8	0	12	2	6	0	12	1	5	1	18	0	34	0	20	2	16	0	25	2	4	0	11	1	14	0	9	2	12	0	46	5	29	9	40	3	29	3	33	5	23	2	34	3	29
PIK3CA	H2	rs2677760
PIK3CA	H2	rs2699905
PIK3CA	H3	rs2459693	47	24	31	11	45	28	55	31	48	16	45	20	48	23	29	9	21	2	27	3	47	8	27	2	10	2	16	1	18	0	23	1	26	1	14	3	30	2	39	6	40	7	29	3	47	6	36
PIK3CA	H3	rs2677760
PIK3CA	H3	rs6443624
PIK3CA	H3	rs9831234
PIK3CA	H4	rs2459693	26	1	16	3	31	2	27	4	46	7	30	2	42	2	12	3	15	0	11	0	12	2	3	0	12	0	9	1	4	1	12	0	7	0	6	0	3	0	14	0	10	1	6	0	7	0	7
PIK3CA	H4	rs2677760
PIK3CA	H5	rs2459693	18	1	8	2	24	1	21	0	24	1	13	0	28	4	7	1	4	0	2	0	11	0	3	0	8	0	13	0	6	0	10	0	11	0	6	0	12	0	8	0	14	0	16	0	16	1	10
PIK3CA	NM		9	0	2	1	5	0	19	3	3	1	13	0	3	0	5	1	5	0	4	0	11	0	3	0	1	0	1	0	0	0	0	0	11	1	3	0	13	0	17	0	12	0	2	0	1	0	7
SCN1A	#1		46	27	29	16	51	30	54	22	45	24	41	26	58	29	28	5	28	14	39	15	46	5	29	5	42	19	40	9	47	14	31	7	20	3	29	5	23	1	31	4	21	1	25	2	28	2	24
SCN1A	#2	rs3812718	37	11	26	8	45	9	57	12	49	11	38	12	46	11	45	30	29	7	43	16	54	16	44	41	53	23	44	43	52	27	41	49	47	29	47	33	41	35	55	23	50	32	37	33	52	34	45
SCN1A	#3	rs2298771	29	2	15	2	21	1	32	7	22	6	15	0	25	3	33	6	25	2	22	2	44	11	21	0	23	2	20	1	20	3	12	1	43	12	36	5	28	9	46	14	43	17	34	3	44	5	43
SCN1A	#4	rs2298771	0	0	0	0	1	0	1	0	0	0	0	0	1	0	0	0	0	0	0	0	0	0	0	0	0	0	0	0	1	0	0	0	0	0	0	0	0	0	0	0	0	0	0	0	0	0	0
SCN1A	#4	rs3812718
SCN5A	Haplotype A		56	34	24	37	45	43	37	66	36	52	36	39	49	49	10	84	4	59	25	58	12	91	32	49	39	53	49	45	24	76	51	37	0	99	6	92	0	91	3	104	0	107	4	82	2	101	6
SCN5A	NM		56	6	24	0	45	11	37	10	36	11	36	10	49	10	10	0	4	1	25	2	12	1	32	12	39	11	49	11	24	4	51	11	0	0	6	1	0	0	3	0	0	0	4	0	2	0	6
SCNN1B	1_1		11	0	12	3	5	0	3	0	5	1	3	0	3	0	39	36	26	31	28	49	56	27	44	26	45	21	59	17	41	19	53	21	48	34	38	48	50	35	55	35	52	40	45	16	55	25	61
SCNN1B	1_2	rs1004749	11	0	10	1	5	0	17	0	8	0	8	0	12	0	28	4	17	3	10	1	29	5	18	5	32	5	32	4	24	4	25	1	45	6	35	8	34	2	42	4	33	3	24	1	27	4	33
SCNN1B	1_2	rs239345
SCNN1B	1_2	rs886113
SCNN1B	1_2	rs9931588
SCNN1B	1_3	rs886113	43	8	24	5	37	6	48	17	35	7	44	11	38	6	17	5	11	1	16	3	34	0	38	9	36	8	40	6	41	13	43	10	17	0	4	0	13	1	19	1	24	2	37	5	33	6	38
SCNN1B	1_4	rs239345	0	0	1	0	0	0	0	0	0	0	0	0	0	0	1	0	0	0	3	0	2	0	1	0	4	0	6	0	0	0	4	0	5	0	2	0	6	0	9	0	9	0	6	0	8	0	9
SCNN1B	1_4	rs886113
SCNN1B	NM		43	34	41	8	41	49	52	36	40	47	43	25	43	54	11	1	4	0	7	0	17	3	5	0	17	2	15	2	28	1	9	0	3	0	7	0	3	0	9	0	6	0	14	1	13	0	19
SLC22A1	*1		5	91	4	57	0	99	0	113	0	99	0	85	0	108	8	86	3	61	2	83	6	98	0	93	0	103	0	105	0	104	0	99	20	79	13	85	17	74	18	89	13	92	4	82	3	100	5
SLC22A1	*3	rs12208357	3	0	2	0	0	0	0	0	0	0	0	0	0	0	7	0	2	0	1	0	4	0	0	0	0	0	0	0	0	0	0	0	16	0	12	0	11	0	11	0	9	2	3	0	3	0	5
SLC22A1	*4	rs34130495	2	0	2	0	0	0	0	0	0	0	0	0	0	0	1	0	1	0	1	0	2	0	0	0	0	0	0	0	0	0	0	0	3	0	3	0	4	0	7	0	4	0	1	0	0	0	0
SLC22A1	NM		0	0	0	0	0	0	0	0	0	0	0	0	0	0	0	0	0	0	0	0	0	0	0	0	0	0	0	0	0	0	0	0	1	0	0	0	2	0	0	0	0	0	0	0	0	0	0
SLC25A27	CCAC		35	51	26	27	51	37	31	77	43	53	37	40	38	61	46	22	38	9	46	8	50	33	39	44	45	49	37	54	48	47	37	50	49	30	46	21	44	27	49	23	45	24	41	18	44	12	40
	CCAT	rs2270450	35	2	24	1	49	8	27	4	38	1	32	4	38	3	25	4	27	3	41	16	26	3	17	2	12	1	16	1	17	1	15	2	6	0	14	0	9	0	14	0	19	1	32	8	35	4	48
	CTAT	rs10807344	7	0	7	0	0	0	1	0	2	0	2	0	1	0	28	6	14	2	7	1	27	3	22	3	21	0	23	3	24	0	23	3	31	6	31	7	31	3	33	5	34	6	28	2	45	10	40
	CTAT	rs2270450
	TCTC	rs3757241	8	0	6	0	2	0	4	0	4	1	5	0	6	0	22	1	19	1	24	1	22	1	10	0	25	1	18	0	21	1	13	0	37	1	33	9	28	4	44	9	40	7	15	0	16	7	15
	TCTC	rs9395206
	NM		1	0	3	0	6	0	1	0	1	0	6	0	5	0	1	0	0	0	0	0	3	0	0	0	1	0	0	0	0	0	0	0	1	0	0	0	2	0	0	0	0	0	0	0	0	0	1
SLCO1B1	*1		22	2	12	0	20	0	24	3	17	5	19	2	30	1	18	0	10	1	21	0	18	2	0	0	0	0	0	0	0	0	0	0	18	1	18	1	20	3	19	2	19	1	6	0	4	0	5
	*1B,*24	rs2306283	31	2	14	1	29	7	51	5	41	6	35	4	33	1	15	1	21	2	32	5	20	2	29	3	43	4	43	7	43	8	38	3	4	0	5	0	4	0	10	2	4	0	29	9	45	14	34
	*20	rs2291075	13	1	4	0	12	0	10	0	6	0	8	0	10	0	1	0	1	0	3	0	11	0	3	0	0	0	0	0	0	0	2	0	4	0	6	0	5	0	5	0	6	1	1	0	1	0	1
	*20	rs2306283
	*20	rs34671512
	*21	rs2291075	0	0	0	0	0	0	0	0	3	0	0	0	0	0	5	0	2	0	0	0	1	0	3	0	1	0	3	0	3	0	3	0	3	0	8	0	0	0	4	0	2	0	4	0	10	0	6
	*21	rs2306283
	*21	rs4149015
	*28	rs11045852	0	0	1	0	0	0	1	0	0	0	1	0	0	0	0	0	0	0	0	0	0	0	0	0	0	0	0	0	0	0	0	0	0	0	0	0	0	0	0	0	0	0	0	0	0	0	0
	*28	rs11045853
	*28	rs2306283
	*35	rs2306283	1	0	0	0	0	0	0	0	6	0	0	0	2	0	0	0	0	0	0	0	0	0	0	0	0	0	0	0	0	0	0	0	0	0	0	0	0	0	0	0	1	0	0	0	0	0	0
	*35	rs34671512
	*14	rs11045819	0	0	0	0	0	0	0	0	0	0	0	0	0	0	0	0	0	0	0	0	0	0	0	0	0	0	0	0	0	0	0	0	0	0	0	0	0	0	0	0	0	0	0	0	0	0	0
	*14	rs2306283
	*27	rs2306283	1	0	0	0	0	0	0	0	0	0	0	0	0	0	0	0	0	0	0	0	0	0	0	0	0	0	0	0	0	0	0	0	0	0	0	0	0	0	0	0	0	0	0	0	0	0	0
	*27	rs59113707
	*19	rs34671512	0	0	0	0	0	0	0	0	0	0	0	0	0	0	0	0	0	0	0	0	0	0	0	0	0	0	0	0	0	0	0	0	0	0	0	0	1	0	0	0	0	0	0	0	0	0	0
	*19	rs4149057
	NM		50	32	27	31	39	42	66	29	51	26	43	26	57	40	35	56	28	30	36	34	36	57	35	55	42	56	46	52	44	51	41	54	25	71	31	64	26	60	30	69	32	73	28	43	50	34	44
SULT1A2	*1		47	36	28	28	36	53	39	71	37	49	39	40	47	55	42	35	30	23	37	5	52	30	3	90	20	80	13	91	23	79	7	91	52	27	62	21	41	28	54	37	42	43	35	49	47	49	42
SULT1A2	*2	rs1059491	40	7	19	4	23	4	19	2	33	4	31	4	35	2	28	11	27	7	38	40	32	14	3	0	21	2	8	1	23	2	6	1	44	11	54	12	41	9	41	8	30	11	19	2	39	4	35
SULT1A2	*2	rs1136703
SULT1A2	*3	rs10797300	10	1	8	0	15	1	6	0	15	1	9	0	17	0	19	2	9	0	3	0	27	4	0	0	1	0	2	0	0	0	1	0	18	3	15	0	23	1	26	1	24	4	15	0	11	0	11
SULT1A2	NM		7	0	3	0	6	1	16	0	5	0	3	0	3	0	3	0	2	0	2	0	1	0	0	0	0	0	3	0	0	0	0	0	2	0	1	0	1	0	1	0	2	0	1	0	3	0	6
SULT1C2	*1		6	90	2	59	5	94	9	104	14	85	6	78	5	103	13	79	3	61	1	84	7	97	30	58	21	81	18	86	10	94	18	78	13	86	8	91	13	78	19	86	16	91	9	76	18	85	14
SULT1C2	*2	rs17036104	3	0	1	0	3	0	9	0	10	0	4	0	5	0	11	1	3	0	0	0	6	0	30	5	21	1	18	1	10	0	17	3	8	0	7	0	7	0	18	2	15	0	8	1	11	0	10
SULT1C2	*4	rs17036058	3	0	1	0	2	0	0	0	4	0	4	0	0	0	4	0	0	0	1	0	1	0	0	0	0	0	0	0	0	0	1	0	5	0	1	0	5	0	1	0	1	0	0	0	6	0	4
SULT1C2	*3	rs72549391	0	0	0	0	0	0	0	0	0	0	0	0	0	0	0	0	0	0	0	0	0	0	0	0	0	0	0	0	0	0	0	0	0	0	0	0	1	0	0	0	0	0	1	0	1	0	0
SULT2A1	*1		22	70	11	50	27	67	26	82	23	75	26	55	25	79	3	91	2	62	0	85	5	99	0	93	0	103	0	105	0	104	0	99	0	99	0	99	0	91	0	107	0	107	0	86	0	103	0
	*2	rs11569679	10	2	5	0	8	0	15	2	9	0	11	1	11	0	2	0	0	0	0	0	4	0	0	0	0	0	0	0	0	0	0	0	0	0	0	0	0	0	0	0	0	0	0	0	0	0	0
	*4	rs11569680	1	0	2	0	4	0	1	0	0	0	2	0	1	0	0	0	0	0	0	0	0	0	0	0	0	0	0	0	0	0	0	0	0	0	0	0	0	0	0	0	0	0	0	0	0	0	0
	*3	rs11569681	1	0	0	0	0	0	0	0	0	0	0	0	0	0	0	0	0	0	0	0	0	0	0	0	0	0	0	0	0	0	0	0	0	0	0	0	0	0	0	0	0	0	0	0	0	0	0
	NM		14	0	4	0	19	3	16	0	14	1	17	1	19	1	1	0	2	0	0	0	1	0	0	0	0	0	0	0	0	0	0	0	0	0	0	0	0	0	0	0	0	0	0	0	0	0	0
SULT4A1	#1		7	0	5	0	6	0	1	0	1	0	5	0	8	0	14	2	15	4	23	1	19	1	39	13	35	7	45	5	40	9	35	12	24	2	25	0	14	1	17	0	15	0	32	2	40	6	27
SULT4A1	#2	rs2285162	45	10	20	7	55	25	50	22	50	17	45	18	53	14	26	1	15	3	17	2	28	2	3	0	3	0	4	0	1	0	0	0	20	2	30	1	29	2	27	1	33	4	10	0	13	0	15
SULT4A1	#2	rs2285164
SULT4A1	#3	rs2285167	8	0	5	0	1	0	3	0	9	0	1	0	5	0	16	2	10	0	0	0	27	0	29	3	26	2	24	2	27	2	24	4	32	4	26	2	20	5	28	8	28	3	36	3	31	4	32
SULT4A1	#4	rs138079	11	1	6	0	9	0	11	0	12	0	6	0	9	0	24	4	10	0	2	0	27	3	2	0	0	0	1	0	3	0	5	0	23	0	18	1	25	3	32	4	29	0	3	0	5	2	3
SULT4A1	#4	rs2285162
SULT4A1	#4	rs2285164
SULT4A1	#5	rs138067	39	18	21	9	43	4	56	20	46	6	35	6	57	15	37	1	7	1	8	0	44	3	9	0	11	1	16	0	20	1	10	0	32	4	36	4	32	1	43	5	32	6	33	3	36	8	33
SULT4A1	#5	rs138099
SULT4A1	#5	rs138102
SULT4A1	#5	rs138110
SULT4A1	#5	rs2285162
SULT4A1	#5	rs2285164
SULT4A1	#5	rs470089
SULT4A1	#5	rs470091
SULT4A1	#6	rs138067	14	0	17	2	8	0	5	0	12	1	17	2	9	0	34	7	28	13	45	33	32	5	42	14	57	23	51	25	47	22	55	17	33	3	38	4	30	3	25	2	43	3	32	4	33	3	42
SULT4A1	#6	rs138110
SULT4A1	#6	rs2285161
SULT4A1	#6	rs2285162
SULT4A1	#6	rs2285164
SULT4A1	NM		10	0	10	1	14	2	12	2	16	2	9	0	17	0	1	1	1	0	3	0	3	0	2	0	8	0	5	0	2	0	3	0	4	0	1	0	2	0	2	0	2	0	2	0	2	0	6
TPMT	*1		40	0	26	0	35	4	30	5	26	3	20	2	29	2	39	16	35	10	39	9	48	9	52	27	42	33	44	31	52	21	48	28	43	15	43	17	48	8	48	18	54	18	46	8	49	17	45
TPMT	*1S	rs2842934	10	1	4	0	12	0	29	3	9	1	11	0	14	1	12	0	13	2	8	0	16	1	10	0	16	4	20	3	19	1	14	0	9	0	12	1	10	3	20	1	13	1	28	4	39	3	29
TPMT	*8	rs56161402	2	0	2	0	6	0	5	0	1	0	0	0	5	0	1	0	0	0	1	0	0	0	0	0	0	0	0	0	0	0	0	0	0	0	0	0	0	0	0	0	0	0	0	0	0	0	0
TPMT	*24	rs6921269	0	0	0	0	0	0	1	0	0	0	0	0	0	0	0	0	0	0	0	0	0	0	0	0	0	0	0	0	0	0	0	0	0	0	0	0	0	0	0	0	0	0	0	0	0	0	0
TPMT	*33	rs112339338	0	0	0	0	0	0	0	0	0	0	0	0	0	0	0	0	0	0	0	0	0	0	0	0	0	0	0	0	0	0	0	0	0	0	0	0	0	0	0	0	1	0	0	0	0	0	0
TPMT	*3C	rs1142345	0	0	0	0	1	0	0	0	0	0	0	0	0	0	0	0	0	0	0	0	0	0	0	0	0	0	0	0	0	0	0	0	0	0	0	0	0	0	0	0	0	0	0	0	1	0	0
TPMT	*6	rs75543815	0	0	0	0	0	0	0	0	0	0	0	0	0	0	0	0	0	0	0	0	0	0	0	0	1	0	0	0	0	0	0	0	0	0	0	0	0	0	0	0	0	0	0	0	0	0	0
	NM		46	46	26	32	44	46	47	49	32	61	29	53	44	59	40	32	36	10	44	30	46	39	48	11	47	13	44	17	59	17	42	19	46	35	47	30	50	26	50	29	60	24	42	16	53	12	50
UGT1A1	*1		11	1	13	0	6	0	4	0	7	0	3	0	5	0	33	10	24	6	23	5	46	13	41	12	56	14	54	13	45	27	46	19	59	12	56	15	42	18	57	11	44	14	30	3	35	7	30
	*6	rs4148323	0	0	1	0	0	0	0	0	0	0	0	0	0	0	4	0	3	0	0	0	0	0	18	0	42	2	24	4	23	2	11	1	0	0	7	0	0	0	0	0	0	0	4	0	3	0	2
	*60	rs4124874	15	0	8	1	15	1	11	2	13	1	19	2	17	4	13	0	8	0	18	2	6	0	20	0	10	0	15	0	4	0	22	3	4	0	3	0	4	0	3	0	8	0	5	0	5	0	7
	*7	rs34993780	0	0	0	0	0	0	0	0	0	0	0	0	0	0	0	0	0	0	0	0	0	0	1	0	0	0	1	0	0	0	0	0	0	0	0	0	0	0	0	0	0	0	0	0	0	0	0
	*74	rs34531096	0	0	0	0	0	0	0	0	0	0	0	0	0	0	0	0	0	0	0	0	0	0	3	0	8	0	1	0	2	0	3	0	0	0	0	0	0	0	0	0	0	0	0	0	0	0	0
	*79	rs8330	0	0	3	0	0	0	0	0	0	0	0	0	0	0	1	0	1	0	0	0	2	1	0	0	0	0	0	0	0	0	0	0	0	0	0	0	1	0	1	0	0	0	0	0	2	0	1
	*88	rs2302538	2	0	0	0	4	0	1	0	9	0	0	0	6	0	1	0	2	0	1	0	1	0	0	0	0	0	0	0	0	0	0	0	0	0	7	0	2	0	2	0	4	0	2	0	0	0	1
	*76	rs10929303	0	0	0	0	0	0	0	0	0	0	0	0	0	0	0	0	0	0	0	0	0	0	0	0	0	0	0	0	0	0	0	0	0	0	0	0	1	0	0	0	0	0	0	0	0	0	0
	*87	rs4148327	0	0	0	0	0	0	0	0	0	0	0	0	0	0	0	0	0	0	0	0	0	0	0	0	0	0	1	0	0	0	0	0	0	0	0	0	0	0	0	0	0	0	0	0	0	0	0
	NM		28	67	23	36	23	74	14	96	29	69	22	61	26	77	40	38	30	24	34	40	45	40	43	18	38	10	54	13	46	15	38	16	59	26	53	21	42	27	57	36	48	41	37	44	41	53	35
UGT1A10	*1a		31	62	16	44	27	65	29	84	39	56	30	52	26	81	19	72	8	55	6	79	17	86	25	63	15	88	19	83	8	96	23	74	32	64	32	65	23	60	31	72	35	71	8	78	9	92	8
	*1b	rs11683356	0	0	4	0	0	0	0	0	0	0	0	0	0	0	4	0	4	0	1	0	3	0	0	0	1	0	0	0	0	0	0	0	4	0	9	0	6	0	6	0	6	0	1	0	0	0	1
	*2a	rs10187694	9	0	3	0	2	0	6	0	4	1	7	0	5	0	1	0	1	0	0	0	0	0	0	0	0	0	0	0	0	0	0	0	0	0	0	0	0	0	0	0	0	0	0	0	0	0	0
	*4c	rs17854828	6	1	3	0	8	0	7	0	4	0	14	1	10	0	1	0	0	0	0	0	0	0	0	0	0	0	0	0	0	0	0	0	0	0	0	0	0	0	0	0	0	0	0	0	0	0	0
	*4c	rs28969685
	*4c	rs45523834
	*1d	rs17854828	0	0	0	0	0	0	0	0	1	0	0	0	0	0	0	0	0	0	0	0	0	0	0	0	0	0	0	0	0	0	0	0	0	0	0	0	0	0	0	0	0	0	0	0	0	0	0
	*1d	rs45523834
	*5	rs56935833	0	0	0	0	0	0	0	0	0	0	0	0	0	0	0	0	0	0	0	0	0	0	0	0	0	0	0	0	1	0	0	0	0	0	0	0	0	0	0	0	0	0	0	0	0	0	0
	NM		20	0	6	1	23	4	16	0	34	1	13	0	13	0	17	1	5	0	5	0	16	0	25	5	14	0	19	3	7	0	23	2	28	3	25	1	21	6	29	2	29	1	7	0	9	2	7
UGT1A3	*1		31	4	27	3	21	2	24	4	29	2	25	3	29	0	49	24	30	16	39	14	60	24	43	29	47	52	45	43	41	52	51	35	48	32	49	33	45	34	55	37	55	32	47	9	53	12	44
UGT1A3	*2	rs1983023	48	34	31	18	48	40	45	49	48	40	42	36	43	49	45	15	34	8	44	17	59	11	24	2	22	0	22	1	23	6	15	0	48	11	48	13	36	9	49	8	40	11	48	10	44	25	45
UGT1A3	*2	rs2008584
UGT1A3	*3	rs2008584	19	0	8	1	19	1	23	1	18	0	16	0	22	0	11	1	10	2	20	2	13	0	28	14	29	2	35	10	24	2	40	10	12	1	5	0	9	0	10	2	24	1	29	4	30	2	29
UGT1A3	*6	rs1983023	6	0	5	0	10	0	18	0	9	1	5	0	12	0	2	0	1	0	0	0	4	1	1	0	0	0	0	0	0	0	2	0	2	0	4	0	6	0	5	0	7	0	2	0	1	0	2
UGT1A3	*6	rs2008584
UGT1A3	*6	rs45449995
UGT1A3	NM		10	1	7	0	14	0	8	0	8	0	4	0	12	0	1	0	1	0	1	0	0	0	0	0	0	0	0	0	0	0	0	0	0	0	0	0	0	0	1	0	0	0	0	0	0	0	0
UGT1A3	*1a		23	2	26	1	15	1	11	1	21	0	7	0	19	0	50	21	29	16	39	14	59	23	43	27	54	41	51	34	43	46	52	32	47	32	49	33	46	33	56	35	55	31	45	9	53	12	44
	*2a	rs1983023	41	24	25	12	44	26	51	27	50	27	41	20	47	35	34	12	32	5	44	16	46	9	24	2	22	0	22	1	23	6	15	0	38	7	41	12	25	6	41	6	34	7	45	10	42	23	43
	*2a	rs2008584
	*2a	rs2008595
	*2a	rs3806596
	*2a	rs3806597
	*2a	rs3821242
	*2a	rs6431625
	*2a	rs6706232
	*2a	rs7574296
	*2b	rs1983023	0	0	1	0	0	0	0	0	0	0	0	0	0	0	2	0	3	0	0	0	4	0	0	0	0	0	0	0	0	0	0	0	6	0	2	0	4	0	0	0	3	0	1	0	4	0	1
	*2b	rs2008584
	*2b	rs2008595
	*2b	rs3806596
	*2b	rs3806597
	*2b	rs3821242
	*2b	rs55781538
	*2b	rs6431625
	*2b	rs6706232
	*2b	rs7574296
	*2c	rs17868336	1	0	0	0	0	0	0	0	0	0	0	0	0	0	9	0	2	0	1	0	3	0	0	0	0	0	0	0	0	0	0	0	5	0	1	0	7	0	9	0	8	0	1	0	0	0	0
	*2c	rs1983023
	*2c	rs2008584
	*2c	rs2008595
	*2c	rs3806596
	*2c	rs3806597
	*2c	rs3821242
	*2c	rs45507691
	*2c	rs6431625
	*2c	rs6706232
	*2c	rs7574296
	*2d	rs1983023	3	0	1	0	0	0	0	0	0	0	0	0	0	0	2	1	1	0	0	0	4	0	0	0	0	0	0	0	0	0	0	0	5	0	6	0	5	0	0	0	3	0	1	0	2	0	1
	*2d	rs2008584
	*2d	rs2008595
	*2d	rs3806596
	*2d	rs3806597
	*2d	rs3821242
	*2d	rs45507691
	*2d	rs6431625
	*2d	rs6706232
	*2d	rs7574296
	*3a	rs2008584	19	0	8	1	19	1	23	1	18	0	16	0	22	0	11	1	10	2	20	2	13	0	33	9	21	0	28	6	16	1	36	8	12	1	5	0	9	0	11	1	24	1	29	4	30	2	29
	*3a	rs2008595
	*3a	rs3806596
	*3a	rs3806597
	*3a	rs3821242
	*3a	rs6706232
	*3a	rs7574296
	*4a	rs45625338	0	0	0	0	0	0	0	0	0	0	0	0	0	0	0	0	0	0	0	0	0	0	4	0	15	0	12	0	10	0	4	0	0	0	0	0	0	0	0	0	0	0	1	0	0	0	0
	*6a	rs1983023	6	0	5	0	10	0	18	0	8	1	5	0	12	0	2	0	1	0	0	0	4	1	1	0	0	0	0	0	0	0	2	0	2	0	4	0	6	0	5	0	7	0	2	0	1	0	2
	*6a	rs2008584
	*6a	rs2008595
	*6a	rs3806596
	*6a	rs3806597
	*6a	rs3821242
	*6a	rs45449995
	*6a	rs6431625
	*6a	rs6706232
	*6a	rs7574296
	*8a	rs61764030	0	0	0	0	0	0	0	0	0	0	0	0	0	0	1	0	1	0	0	0	1	0	0	0	0	0	0	0	0	0	0	0	1	0	0	0	1	0	3	0	1	0	0	0	0	0	0
	*1e	rs2008595	0	0	0	0	0	0	0	0	0	0	0	0	0	0	0	0	0	0	0	0	0	0	0	0	0	0	0	0	0	0	0	0	0	0	0	0	0	0	0	0	0	0	1	0	0	0	0
	NM		35	6	18	5	40	7	47	9	27	9	37	12	38	4	5	1	3	0	2	0	6	1	5	0	12	0	15	0	10	0	7	1	0	1	0	0	1	0	5	0	1	0	0	0	0	0	0
UGT1A4	*1a		26	67	21	38	30	65	20	92	27	70	21	62	27	79	33	53	24	36	33	49	39	57	31	46	35	63	40	55	28	72	40	42	36	52	39	54	46	38	48	44	54	36	50	26	42	48	39
UGT1A4	*1b	rs2011404	4	0	9	1	5	0	2	0	3	0	0	0	4	0	19	0	13	0	14	0	27	2	3	0	4	0	4	0	2	0	11	1	19	5	25	2	28	4	42	3	37	3	29	0	21	0	34
UGT1A4	*1c	rs12468274	0	0	0	0	0	0	0	0	0	0	0	0	0	0	0	0	0	0	1	0	0	0	7	0	4	0	4	0	0	0	11	0	0	0	0	0	0	0	0	0	0	0	0	0	2	0	0
UGT1A4	*1c	rs2011219
UGT1A4	*1c	rs3732217
UGT1A4	*1c	rs3732218
UGT1A4	*1c	rs3732219
UGT1A4	*2	rs6755571	4	1	1	0	2	0	0	0	0	0	0	0	0	0	10	2	3	0	1	0	7	0	0	0	0	0	0	0	0	0	0	0	10	0	7	0	11	0	9	0	11	0	2	0	2	0	1
UGT1A4	*3a	rs2011425	1	0	0	0	0	0	2	0	1	0	0	0	0	0	2	0	1	0	0	0	3	0	1	0	0	0	0	0	0	0	1	0	4	0	7	0	4	0	5	0	7	0	2	0	7	0	3
UGT1A4	*3a	rs3732218
UGT1A4	*3a	rs3732219
UGT1A4	*3b	rs2011425	0	0	0	0	0	0	1	0	0	0	0	0	0	0	0	0	1	0	0	0	1	0	0	0	3	0	0	0	0	0	0	0	0	0	0	0	0	0	1	0	1	0	0	0	3	0	0
UGT1A4	*4	rs3892221	3	0	2	0	5	1	6	0	11	0	17	1	9	0	0	0	0	0	0	0	0	0	0	0	5	0	0	0	6	0	0	0	0	0	1	0	0	0	1	0	0	0	0	0	0	0	0
UGT1A4	NM		18	0	11	0	22	1	9	1	16	0	4	1	18	0	12	1	10	2	19	2	13	0	28	12	25	2	32	10	24	2	37	6	13	1	7	0	9	0	10	2	24	1	29	4	29	2	29
UGT1A5	*1		19	77	11	50	22	76	11	101	16	83	4	80	18	90	14	79	11	51	20	63	15	89	29	49	29	72	36	59	24	78	43	48	16	82	14	85	13	78	15	90	25	78	32	50	35	65	32
UGT1A5	*2	rs12475068	0	0	0	0	0	0	0	0	0	0	0	0	0	0	0	0	0	0	0	0	0	0	0	0	0	0	0	0	0	0	0	0	0	0	0	0	0	0	0	0	0	0	1	0	0	0	0
UGT1A5	NM		19	0	11	0	22	1	11	1	16	0	4	1	18	0	14	1	11	2	20	2	15	0	29	15	29	2	36	10	24	2	43	8	16	1	14	0	13	0	15	2	25	4	31	4	35	3	32
UGT1A6	*1a		49	21	32	19	55	29	61	35	58	13	44	28	44	39	47	15	29	19	40	30	62	21	51	21	57	30	54	26	42	45	44	36	48	14	49	8	41	17	64	18	46	19	39	9	44	7	40
UGT1A6	*1b	rs12474980	19	0	7	1	17	0	17	0	29	2	7	0	7	0	30	1	16	2	20	3	26	1	28	6	21	1	31	5	17	0	32	2	33	5	30	6	30	7	36	3	43	3	29	5	39	4	27
UGT1A6	*1b	rs12476197
UGT1A6	NM		40	21	31	6	50	9	60	9	55	13	47	8	41	23	51	14	29	6	32	6	50	13	43	5	52	7	43	10	33	13	36	5	51	14	53	19	41	11	52	10	51	15	52	12	49	26	43
UGT1A7	*1a		50	12	29	12	49	19	59	18	46	5	30	13	53	21	49	13	28	19	40	30	63	19	51	21	58	30	54	26	43	45	44	36	48	14	49	8	41	17	63	18	46	19	39	9	44	7	40
UGT1A7	*2	rs17863778	43	4	26	3	42	10	48	15	56	20	41	14	49	5	38	4	22	3	40	8	34	2	37	13	26	3	40	10	27	2	40	9	35	6	35	7	31	7	41	4	46	4	32	8	41	6	35
UGT1A7	*2	rs17868323
UGT1A7	*2	rs17868324
UGT1A7	*9	rs17863778	8	0	2	0	3	0	5	0	0	0	4	0	5	0	0	0	0	0	0	0	0	0	0	0	0	0	0	0	0	0	0	0	0	0	0	0	0	0	0	0	0	0	0	0	0	0	0
UGT1A7	*9	rs17868323
UGT1A7	*9	rs17868324
UGT1A7	*9	rs61261057
UGT1A7	NM		35	12	27	4	38	4	38	5	36	5	37	2	37	10	47	10	28	3	12	1	49	10	28	1	48	4	38	3	32	6	20	2	51	12	54	15	40	11	46	10	48	14	47	10	49	23	47
UGT1A8	*1a		30	60	23	33	36	53	42	65	39	51	40	40	33	73	42	32	25	28	37	42	44	40	44	10	53	16	55	17	52	19	43	9	52	26	41	40	41	30	48	36	50	39	44	34	49	41	42
UGT1A8	*1b	rs1042605	26	4	15	2	35	9	42	4	36	8	38	4	28	2	18	1	5	0	5	0	18	0	25	5	14	0	19	3	7	0	24	2	28	3	26	1	21	6	31	2	29	1	7	0	9	2	7
UGT1A8	*2	rs1042597	8	0	14	0	3	0	4	0	5	0	4	0	5	0	30	13	26	8	35	4	40	12	47	20	55	26	54	21	53	29	51	29	44	5	36	6	28	9	36	8	37	7	37	8	42	10	41
UGT1A8	*3	rs17863762	0	0	0	0	0	0	0	0	0	0	0	0	0	0	6	0	0	0	1	0	2	0	0	0	0	0	0	0	0	0	0	0	6	0	1	0	2	0	7	0	4	0	0	0	0	0	0
UGT1A9	*1a		48	12	29	11	48	19	57	20	43	4	29	13	54	20	49	13	28	19	40	30	62	20	51	21	59	29	54	26	42	44	44	36	48	14	49	8	41	17	62	18	46	19	40	9	44	7	40
UGT1A9	*1q	rs2741047	47	22	28	12	48	14	59	23	57	17	38	32	56	22	44	12	24	4	12	1	47	11	28	1	48	4	38	3	32	6	20	2	47	14	46	15	41	8	48	9	47	12	47	10	49	23	44
UGT1A9	*1q	rs2741048
UGT1A9	*1r	rs2741047	23	0	8	2	26	3	22	0	36	2	12	0	16	0	26	2	15	2	21	3	26	1	31	11	24	2	39	7	25	2	38	7	30	5	29	4	30	7	33	3	41	2	30	5	37	5	27
UGT1A9	*1r	rs2741048
UGT1A9	*1r	rs4663871
UGT1A9	*1s	rs17868322	0	0	4	0	0	0	0	0	0	0	0	0	0	0	4	0	4	0	1	0	3	0	0	0	1	0	0	0	0	0	0	0	4	0	9	0	6	0	5	0	6	0	1	0	0	0	1
UGT1A9	*1s	rs2741047
UGT1A9	*1s	rs2741048
UGT1A9	*4	rs66915469	0	0	0	0	0	0	0	0	0	0	0	0	0	0	0	0	0	0	0	0	0	0	0	0	1	0	0	0	2	0	0	0	0	0	0	0	0	0	0	0	0	0	0	0	0	0	0
	*5	rs58597806	0	0	0	0	0	0	0	0	0	0	0	0	0	0	0	0	0	0	0	0	0	0	0	0	0	0	0	0	1	0	0	0	0	0	0	0	0	0	0	0	0	0	0	0	0	0	0
UGT1A9	NM		6	0	3	0	4	0	2	0	16	0	1	0	6	0	11	0	7	0	24	2	6	0	10	0	3	0	7	0	2	0	6	0	3	0	11	0	0	0	6	0	8	0	6	0	6	0	8
UGT2B15	*1		52	19	27	14	50	23	47	34	38	45	32	29	53	26	41	2	27	4	30	3	41	6	46	22	50	28	54	27	59	23	50	22	19	0	26	1	15	2	25	4	25	1	36	9	31	3	38
UGT2B15	*2	rs1902023	48	10	23	4	51	12	50	21	38	10	37	13	50	19	37	6	17	3	28	4	45	9	41	5	44	14	52	6	50	12	34	9	39	5	35	4	31	7	39	4	40	7	26	3	36	10	37
UGT2B15	*4	rs4148269	19	2	17	3	17	1	10	0	9	0	13	1	16	1	46	4	38	10	46	18	39	9	12	1	13	0	13	0	13	0	26	0	46	12	46	14	40	12	51	13	63	8	32	4	37	9	33
UGT2B15	*5	rs1902023	11	0	12	0	8	0	9	0	3	0	2	0	5	0	34	3	10	1	16	0	22	4	23	4	12	1	21	2	14	1	22	2	38	11	45	4	36	9	32	12	47	3	35	5	46	6	46
UGT2B15	*5	rs4148269
	*6	rs148583958	0	0	0	0	0	0	0	0	0	0	0	0	0	0	0	0	0	0	0	0	0	0	0	0	0	0	0	0	0	0	0	0	0	0	0	0	0	0	0	0	0	0	1	0	0	0	0
UGT2B15	NM		0	0	1	0	0	0	0	0	0	0	0	0	0	0	0	0	0	0	0	0	5	0	0	0	1	0	0	0	0	0	0	0	0	0	0	0	0	0	1	0	1	0	0	0	0	0	0
VKORC1	H1		10	0	10	0	5	0	6	0	6	0	9	0	5	0	34	5	26	8	38	11	16	1	27	63	10	93	21	83	20	84	21	73	32	0	22	1	26	0	17	1	28	2	16	0	22	0	8
VKORC1	H2	rs2884737	2	0	4	2	0	0	1	0	1	0	0	0	0	0	22	3	16	0	6	0	31	11	0	0	1	0	0	0	0	0	0	0	33	9	31	3	30	1	39	9	45	9	8	0	13	0	11
VKORC1	H5	rs2884737	0	0	0	0	0	0	0	0	0	0	0	0	0	0	7	0	2	0	0	0	10	0	0	0	0	0	0	0	0	0	0	0	2	0	0	0	6	0	1	0	7	0	2	0	1	0	0
VKORC1	H5	rs7196161
VKORC1	NM		12	84	12	46	5	94	7	106	7	92	9	76	5	103	43	33	34	17	40	32	47	40	27	3	9	0	21	1	20	0	21	5	41	36	41	48	48	35	49	44	52	30	24	61	34	68	17
[truncated: 5 more columns]

## Sheet: Table C
Table 3: Polyphen, SIFT and Minor Allele Frequency scores of the 501 PharmGKB variants found the 1000Genomes project dataset. Data exctracted from Ensembl’s BioMart.
hgnc_symbol	rsid	chromosome	position	gene	polyphen	sift	MAF
UGT1A10	rs10187694	chr2	233636937	ENSG00000242515	0.1	0.16	0.00798722
UGT1A8	rs1042597	chr2	233618225	ENSG00000242366	0.116	0	0.25599
ADRB2	rs1042713	chr5	148826877	ENSG00000169252	0.143	0.17	0.475639
ADRB2	rs1042714	chr5	148826910	ENSG00000169252	0.008	0.47	0.204273
CYP1A1	rs1048943	chr15	74720644	ENSG00000140465	0.836	0.09	0.133387
G6PD	rs1050828	chrX	154536002	ENSG00000160211	0.694	0.02	0.0376159
G6PD	rs1050829	chrX	154535277	ENSG00000160211	0.192	0.03	0.0945695
CYP2C9	rs1057910	chr10	94981296	ENSG00000138109	0.45	0.02	0.0485224
SULT1A2	rs10797300	chr16	28595875	ENSG00000197165	0.355	0.1	0.0736821
SLCO1B1	rs11045852	chr12	21196951	ENSG00000134538	0.099	0.1	0.0159744
SLCO1B1	rs11045853	chr12	21196976	ENSG00000134538	0.993	0.02	0.000599042
CYP2A13	rs112337232	chr19	41090177	ENSG00000197838	0	1	0.0255591
TPMT	rs112339338	chr6	18138970	ENSG00000137364	0.977	0.02	0.000599042
SULT1A2	rs1136703	chr16	28595911	ENSG00000197165	0.017	0.38	0.212859
TPMT	rs1142345	chr6	18130687	ENSG00000137364	0.997	0	0.0391374
TPMT	rs115106679	chr6	18143622	ENSG00000137364	0.015	0.23	0.000199681
SULT2A1	rs11569679	chr19	47871532	ENSG00000105398	0.437	0.03	0.0407348
SULT2A1	rs11569681	chr19	47883735	ENSG00000105398	0	1	0.0239617
CYP2C8	rs11572080	chr10	95067273	ENSG00000138115	0.183	0.36	0.0457268
CYP2C8	rs11572103	chr10	95058349	ENSG00000138115	0.898	0.01	0.0547125
NAT2	rs1208	chr8	18400806	ENSG00000156006	0.001	1	0.322883
SLC22A1	rs12208357	chr6	160122116	ENSG00000175003	0.988	0	0.0203674
NAT2	rs12720065	chr8	18400406	ENSG00000156006	0.113	0.05	0.00638978
CYP2B6	rs12721655	chr19	41004377	ENSG00000197408	0.907	0	0.000798722
G6PD	rs137852339	chrX	154533044	ENSG00000160211	0.123	0.1	0.00211921
CYP1A2	rs138652540	chr15	74749986	ENSG00000140505	0.965	0.24	0.000199681
NAT2	rs138707146	chr8	18400641	ENSG00000156006	0.936	0.01	0.000599042
CYP2A13	rs138870349	chr19	41095936	ENSG00000197838	0.998	0	0.000599042
CYP2B6	rs139029625	chr19	41010006	ENSG00000197408	0.008	0.01	0.00319489
NAT2	rs139351995	chr8	18400475	ENSG00000156006	0.012	0.5	0.000798722
CYP2B6	rs139801276	chr19	41004303	ENSG00000197408	0.086	0.08	0.00219649
SLCO1B1	rs140790673	chr12	21239158	ENSG00000134538	0.126	0.05	0.000399361
CYP2A6	rs143690364	chr19	40849959	ENSG00000255974	0.99	0.03	0.000199681
TPMT	rs144041067	chr6	18138969	ENSG00000137364	0.853	0.04	0.000399361
CYP1A2	rs144148965	chr15	74754843	ENSG00000140505	0.001	0.56	0.000199681
UGT2B15	rs148583958	chr4	68655133	ENSG00000196620	0.999	0.01	0.00319489
CYP1A2	rs149928755	chr15	74753201	ENSG00000140505	0.656	0.02	0.000199681
BRCA1	rs16941	chr17	43092418	ENSG00000012048	0.199	0.16	0.335663
BRCA1	rs16942	chr17	43091983	ENSG00000012048	0.001	1	0.352636
SULT1C2	rs17036058	chr2	108294295	ENSG00000198203	0.144	0.09	0.0103834
SULT1C2	rs17036104	chr2	108305580	ENSG00000198203	0.009	0.09	0.0551118
ABCC2	rs17222723	chr10	99836239	ENSG00000023839	0.005	1	0.0373403
CYP1A2	rs17861157	chr15	74751251	ENSG00000140505	0.019	0.11	0.0239617
UGT1A8	rs17863762	chr2	233618537	ENSG00000242366	1	0	0.00579073
CYP1A1	rs1799814	chr15	74720646	ENSG00000140465	0.008	0.19	0.013778
NAT2	rs1799930	chr8	18400593	ENSG00000156006	0.528	0.03	0.264976
NAT2	rs1799931	chr8	18400860	ENSG00000156006	0.006	0.45	0.0772764
BRCA1	rs1799966	chr17	43071077	ENSG00000012048	0.701	0.01	0.355831
TPMT	rs1800460	chr6	18138997	ENSG00000137364	0.833	0	0.0127796
TPMT	rs1800462	chr6	18143724	ENSG00000137364	0.99	0	0.00219649
DPYD	rs1801159	chr1	97515839	ENSG00000188641	0.001	0.04	0.184904
DPYD	rs1801160	chr1	97305364	ENSG00000188641	0.942	0.1	0.0439297
ADRB1	rs1801252	chr10	114044277	ENSG00000043591	0	0.79	0.177716
ADRB1	rs1801253	chr10	114045297	ENSG00000043591	0	1	0.298323
DPYD	rs1801265	chr1	97883329	ENSG00000188641	0	0.52	0.260184
DPYD	rs1801267	chr1	97098598	ENSG00000188641	0.957	0.02	0.000199681
CYP2A6	rs1801272	chr19	40848628	ENSG00000255974	0.994	0	0.0091853
NAT2	rs1801279	chr8	18400194	ENSG00000156006	1	0	0.0277556
NAT2	rs1801280	chr8	18400344	ENSG00000156006	0.599	0.02	0.292732
CYP2A6	rs1809810	chr19	40844759	ENSG00000255974	0.001	1	0.0135783
CYP2C9	rs182132442	chr10	94972119	ENSG00000138109	0	0.08	0.000798722
CYP2B6	rs186335453	chr19	41004158	ENSG00000197408	0.881	0	0.000399361
UGT2B15	rs1902023	chr4	68670366	ENSG00000196620	0	0.94	0.453474
TPMT	rs200591577	chr6	18147851	ENSG00000137364	0.996	0	0.000199681
CDA	rs2072671	chr1	20589208	ENSG00000158825	0.01	0.11	0.192692
CYP2C9	rs2256871	chr10	94949217	ENSG00000138109	0.984	0	0.0219649
CYP3A7-CYP3A51P	rs2257401	chr7	99709062	ENSG00000282301	0.344	0.01	0.330471
ABCC2	rs2273697	chr10	99804058	ENSG00000023839	0.044	0.15	0.186502
CYP3A5	rs28365083	chr7	99652613	ENSG00000106258	0.064	0.06	0.000798722
CYP3A5	rs28365085	chr7	99648351	ENSG00000106258	0.968	0	0.00159744
CYP2C9	rs28371685	chr10	94981224	ENSG00000138109	0.914	0	0.0071885
CYP2C9	rs28371686	chr10	94981301	ENSG00000138109	0.928	0	0.00459265
CYP3A5	rs28383468	chr7	99676192	ENSG00000106258	0.012	0.76	0.00339457
CYP1A2	rs28399424	chr15	74754828	ENSG00000140505	1	0	0.000798722
CYP1A1	rs28399430	chr15	74720553	ENSG00000140465	0.892	0.01	0.000599042
CYP2A6	rs28399434	chr19	40850414	ENSG00000255974	0.966	0	0.000399361
CYP2A6	rs28399435	chr19	40850341	ENSG00000255974	0.357	0.45	0.0139776
CYP2A6	rs28399454	chr19	40845362	ENSG00000255974	0.011	0.13	0.0319489
CYP2A6	rs28399463	chr19	40844682	ENSG00000255974	0	1	0.00758786
CYP2B6	rs28399499	chr19	41012316	ENSG00000197408	0.999	0	0.0231629
UGT1A10	rs28969685	chr2	233637252	ENSG00000242515	0.993	0.18	0.0113818
CYP2B6	rs3211369	chr19	41016726	ENSG00000197408	0	0.14	0.000599042
CYP2B6	rs3211371	chr19	41016810	ENSG00000197408	0.019	0.56	0.0535144
CYP2B6	rs33926104	chr19	40991390	ENSG00000197408	0.06	0.02	0.00379393
CYP2B6	rs33980385	chr19	40991388	ENSG00000197408	0	1	0.00379393
SLC22A1	rs34130495	chr6	160139792	ENSG00000175003	1	0	0.0061901
CYP2B6	rs34284776	chr19	40991391	ENSG00000197408	0.302	0	0.00379393
SLCO1B1	rs34671512	chr12	21239042	ENSG00000134538	0.006	1	0.0443291
CYP2B6	rs34698757	chr19	41010088	ENSG00000197408	0.989	0.01	0.000199681
CYP2B6	rs34826503	chr19	41012339	ENSG00000197408	0.233	0.01	0.000998403
CYP2B6	rs34883432	chr19	40991367	ENSG00000197408	0.018	0.12	0.00359425
UGT1A9	rs34946978	chr2	233768226	ENSG00000241119	1	0.01	0.00219649
CYP2S1	rs34971233	chr19	41206370	ENSG00000167600	0.986	1	0.0179712
UGT1A9	rs34993780	chr2	233772413	ENSG00000241119	0.999	0	0.000798722
CYP2B6	rs35303484	chr19	40991441	ENSG00000197408	0.059	0.45	0.00119808
CYP2B6	rs35773040	chr19	41004381	ENSG00000197408	0.023	0.07	0.000998403
CYP1A2	rs35796837	chr15	74751252	ENSG00000140505	0.026	0.5	0.00199681
CYP2B6	rs35979566	chr19	41012693	ENSG00000197408	0.308	0.02	0.00179712
CYP2B6	rs36056539	chr19	41006923	ENSG00000197408	0.14	0.04	0.000199681
CYP2B6	rs36060847	chr19	41004125	ENSG00000197408	0.996	0.01	0.000199681
CYP2B6	rs36079186	chr19	41007013	ENSG00000197408	0.001	0.01	0.000798722
CYP2W1	rs3735684	chr7	985219	ENSG00000073067	0.002	0.43	0.0603035
ABCC2	rs3740066	chr10	99844450	ENSG00000023839	0.963	0	0.288139
CYP2W1	rs3808348	chr7	988812	ENSG00000073067	0.037	0.28	0.182508
CYP2B6	rs3826711	chr19	41006919	ENSG00000197408	0.74	0	0.000998403
CYP1A1	rs41279188	chr15	74720638	ENSG00000140465	0.977	0.01	0.000998403
CYP3A5	rs41279854	chr7	99650149	ENSG00000106258	0.969	0	0.000199681
UGT2B15	rs4148269	chr4	68647129	ENSG00000196620	0.001	1	0.367612
NAT2	rs45477599	chr8	18400073	ENSG00000156006	0.791	0.01	0.000599042
CYP1A2	rs45486893	chr15	74754850	ENSG00000140505	0.266	0.04	0.000798722
NAT2	rs45518335	chr8	18400686	ENSG00000156006	0.044	0.28	0.00179712
NAT2	rs45618543	chr8	18400612	ENSG00000156006	0.053	0.18	0.00279553
COMT	rs4680	chr22	19963748	ENSG00000093010	0.222	0.09	0.369209
BRCA1	rs4986850	chr17	43093454	ENSG00000012048	0.279	0.01	0.0335463
BRCA1	rs4986852	chr17	43092412	ENSG00000012048	0.167	0.21	0.00978434
CYP2A6	rs4986891	chr19	40848724	ENSG00000255974	0.202	0	0.00139776
CYP3A4	rs4986910	chr7	99760901	ENSG00000160868	0.182	0.03	0.00259585
CYP3A4	rs4986913	chr7	99760836	ENSG00000160868	0.256	0.08	0.000399361
G6PD	rs5030868	chrX	154534419	ENSG00000160211	0.034	0	0.000794702
NAT2	rs55700793	chr8	18400769	ENSG00000156006	0.359	0.03	0.00159744
DPYD	rs55886062	chr1	97515787	ENSG00000188641	0.977	0	0.000199681
CYP2E1	rs55897648	chr10	133537760	ENSG00000130649	0.007	1	0.000399361
SLC22A1	rs55918055	chr6	160122197	ENSG00000175003	1	0	0.000599042
TPMT	rs56161402	chr6	18130762	ENSG00000137364	0.002	0.55	0.00559105
CYP1A1	rs56240201	chr15	74720599	ENSG00000140465	0.846	0	0.000199681
CYP2A6	rs56256500	chr19	40848266	ENSG00000255974	0.01	0.06	0.00519169
CYP3A4	rs56324128	chr7	99778079	ENSG00000160868	1	0	0.000399361
NAT2	rs56387565	chr8	18400625	ENSG00000156006	0.039	0.31	0.000199681
NAT2	rs56393504	chr8	18400841	ENSG00000156006	0.404	0.01	0.00938498
CYP3A5	rs56411402	chr7	99665237	ENSG00000106258	0.006	0.13	0.000798722
UGT1A10	rs56935833	chr2	233636699	ENSG00000242515	0.004	0.69	0.000199681
CYP2C9	rs57505750	chr10	94981201	ENSG00000138109	1	0	0.000399361
UGT1A9	rs58597806	chr2	233672700	ENSG00000241119	0.951	0.02	0.000199681
UGT1A10	rs58704432	chr2	233637127	ENSG00000242515	0.517	0	0.00199681
SLCO1B1	rs59113707	chr12	21202555	ENSG00000134538	0.044	0.36	0.0169728
SLCO1B1	rs59502379	chr12	21205999	ENSG00000134538	1	0	0.0111821
CYP2A6	rs59552350	chr19	40848716	ENSG00000255974	0.016	0.24	0.00139776
CYP2R1	rs61495246	chr11	14885847	ENSG00000186104	1	0	0.00139776
HTR2C	rs6318	chrX	114731326	ENSG00000147246	0	0.28	0.165828
CYP2E1	rs6413419	chr10	133532171	ENSG00000130649	0.998	0.2	0.077476
CYP2A6	rs6413474	chr19	40843854	ENSG00000255974	0.013	0.37	0.00479233
CYP3A43	rs680055	chr7	99859982	ENSG00000021461	0.135	0	0.124601
TPMT	rs6921269	chr6	18133847	ENSG00000137364	0.01	0.39	0.00738818
NAT2	rs72466456	chr8	18400032	ENSG00000156006	0.999	0	0.000399361
CYP2S1	rs72547592	chr19	41203611	ENSG00000167600	0.003	0.23	0.000399361
SULT1C2	rs72549391	chr2	108294256	ENSG00000198203	0.998	0	0.000599042
CYP2A6	rs72549432	chr19	40850411	ENSG00000255974	0	1	0.00259585
CYP2A6	rs72549435	chr19	40849833	ENSG00000255974	0	1	0.00319489
UGT1A9	rs72551330	chr2	233672032	ENSG00000241119	0.349	0.34	0.00479233
NAT2	rs72554617	chr8	18400502	ENSG00000156006	0.006	1	0.000199681
G6PD	rs72554665	chrX	154532269	ENSG00000160211	0.636	0.18	0.0015894
CYP2C9	rs72558192	chr10	94972179	ENSG00000138109	0.968	0	0.000199681
CYP2E1	rs72559710	chr10	133528530	ENSG00000130649	0.334	0.02	0.000599042
TPMT	rs75543815	chr6	18133845	ENSG00000137364	0.381	0	0.000199681
G6PD	rs76723693	chrX	154533025	ENSG00000160211	0.251	0.03	0.00317881
G6PD	rs78478128	chrX	154536168	ENSG00000160211	0.998	0.01	0.000264901
CYP2W1	rs78873069	chr7	988643	ENSG00000073067	0.069	0.69	0.0131789
NAT2	rs79050330	chr8	18400581	ENSG00000156006	0.998	0	0.00179712
BRCA1	rs799917	chr17	43092919	ENSG00000012048	0	1	0.45607
CYP2B6	rs8192709	chr19	40991369	ENSG00000197408	0.348	0.03	0.047524
CYP2A13	rs8192784	chr19	41088545	ENSG00000197838	0.006	0.2	0.0744808
CYP2A13	rs8192789	chr19	41091846	ENSG00000197838	0.013	0.05	0.0750799
CYP2C9	rs9332239	chr10	94989020	ENSG00000138109	0.681	0	0.000798722

## Sheet: Table D
Table 4: Minor Allele Frequencies of 501 PGx variants per population. Red colour indicates actionable pharmacovariants
	AFR							AMR				EAS					EUR					SAS					AFR	AMR	EAS	EUR	SAS	ALL
rsID	ACB	ASW	ESN	GWD	LWK	MSL	YRI	CLM	MXL	PEL	PUR	CDX	CHB	CHS	JPT	KHV	CEU	FIN	GBR	IBS	TSI	BEB	GIH	ITU	PJL	STU
rs10012	0.510417	0.598361	0.520202	0.610619	0.590909	0.611765	0.583333	0.409574	0.257812	0.276471	0.25	0.150538	0.242718	0.22381	0.0817308	0.207071	0.277778	0.393939	0.291209	0.266355	0.228972	0.436047	0.456311	0.47549	0.380208	0.465686	0.57413	0.301153	0.181548	0.290258	0.443763	0.3748
rs1004749	0.161458	0.204918	0.116162	0.137168	0.136364	0.188235	0.175926	0.228723	0.195312	0.0823529	0.216346	0.172043	0.291262	0.242857	0.288462	0.161616	0.287879	0.267677	0.21978	0.261682	0.196262	0.22093	0.228155	0.25	0.21875	0.240196	0.156581	0.182997	0.233135	0.246521	0.232106	0.208466
rs10187694	0.046875	0.0245902	0.010101	0.0265487	0.030303	0.0411765	0.0231481	0.00531915	0.0078125	0	0	0	0	0	0	0	0	0	0	0	0	0	0	0	0	0	0.0287443	0.00288184	0	0	0	0.00798722
rs10264272	0.114583	0.0491803	0.141414	0.163717	0.242424	0.158824	0.166667	0.0106383	0.0234375	0.0117647	0.0432692	0	0	0	0	0	0	0	0	0.00934579	0.0046729	0	0	0	0	0	0.154312	0.0230548	0	0.00298211	0	0.0445288
rs10276036	0.807292	0.811475	0.818182	0.79646	0.838384	0.758824	0.810185	0.569149	0.53125	0.670588	0.576923	0.376344	0.300971	0.366667	0.399038	0.424242	0.570707	0.570707	0.576923	0.621495	0.579439	0.372093	0.432039	0.406863	0.46875	0.382353	0.806354	0.589337	0.373016	0.584493	0.413088	0.567692
rs1041983	0.494792	0.45082	0.530303	0.384956	0.429293	0.5	0.49537	0.324468	0.273438	0.258824	0.298077	0.494624	0.364078	0.452381	0.355769	0.540404	0.30303	0.29798	0.296703	0.327103	0.299065	0.366279	0.441748	0.401961	0.421875	0.5	0.46823	0.291066	0.439484	0.305169	0.428425	0.397364
rs1042597	0.0416667	0.114754	0.0151515	0.0176991	0.0252525	0.0235294	0.0231481	0.297872	0.328125	0.252941	0.307692	0.467742	0.519417	0.457143	0.533654	0.550505	0.272727	0.242424	0.252747	0.242991	0.238318	0.30814	0.300971	0.269608	0.234375	0.284314	0.0325265	0.295389	0.505952	0.249503	0.279141	0.25599
rs1042605	0.177083	0.155738	0.267677	0.221239	0.262626	0.270588	0.148148	0.106383	0.0390625	0.0294118	0.0865385	0.188172	0.0679612	0.119048	0.0336538	0.141414	0.171717	0.141414	0.181319	0.163551	0.14486	0.0406977	0.0631068	0.0343137	0.0677083	0.0539216	0.216339	0.0691643	0.108135	0.16004	0.0521472	0.130791
rs1042640	0.177083	0.229508	0.237374	0.234513	0.156566	0.164706	0.175926	0.196809	0.171875	0.205882	0.197115	0.112903	0.11165	0.142857	0.129808	0.166667	0.181818	0.0959596	0.197802	0.266355	0.252336	0.156977	0.165049	0.196078	0.177083	0.151961	0.195915	0.194524	0.132937	0.200795	0.169734	0.178914
rs1042713	0.489583	0.45082	0.484848	0.469027	0.510101	0.476471	0.467593	0.484043	0.523438	0.564706	0.591346	0.419355	0.451456	0.390476	0.557692	0.434343	0.651515	0.585859	0.582418	0.616822	0.630841	0.569767	0.567961	0.52451	0.572917	0.539216	0.479576	0.543228	0.451389	0.614314	0.554192	0.524361
rs1042714	0.838542	0.877049	0.878788	0.884956	0.787879	0.905882	0.87963	0.771277	0.859375	0.864706	0.596154	0.897849	0.893204	0.952381	0.942308	0.944444	0.535354	0.631313	0.604396	0.574766	0.607477	0.825581	0.771845	0.823529	0.765625	0.848039	0.863843	0.757925	0.926587	0.590457	0.806748	0.795727
rs10445704	0.421875	0.352459	0.343434	0.336283	0.409091	0.370588	0.398148	0.420213	0.320312	0.252941	0.365385	0.215054	0.286408	0.242857	0.221154	0.151515	0.39899	0.459596	0.346154	0.336449	0.373832	0.436047	0.485437	0.47549	0.484375	0.495098	0.376702	0.34438	0.224206	0.382704	0.476483	0.36222
rs1045642	0.151042	0.188525	0.116162	0.190265	0.141414	0.147059	0.125	0.441489	0.476562	0.376471	0.427885	0.424731	0.378641	0.304762	0.480769	0.40404	0.565657	0.575758	0.527473	0.462617	0.46729	0.610465	0.567961	0.593137	0.510417	0.593137	0.149773	0.427954	0.397817	0.517893	0.574642	0.395168
rs1048943	0.0104167	0.057377	0	0	0	0	0	0.281915	0.335938	0.705882	0.144231	0.290323	0.26699	0.242857	0.206731	0.257576	0.040404	0.0505051	0.032967	0.0186916	0.0327103	0.139535	0.106796	0.122549	0.130208	0.137255	0.00680787	0.354467	0.251984	0.0347913	0.126789	0.133387
rs1048977	0.369792	0.393443	0.419192	0.380531	0.363636	0.352941	0.375	0.287234	0.335938	0.376471	0.283654	0.198925	0.296117	0.185714	0.278846	0.257576	0.363636	0.318182	0.357143	0.280374	0.303738	0.209302	0.305825	0.284314	0.265625	0.284314	0.378971	0.317003	0.244048	0.323062	0.271984	0.311102
rs1050828	0.125	0.155738	0.171717	0.0353982	0.166667	0.0705882	0.212963	0.0159574	0.0078125	0	0.0192308	0	0	0	0	0	0	0	0	0	0	0	0	0	0	0	0.133132	0.0115274	0	0	0	0.0367412
rs1050829	0.317708	0.278689	0.358586	0.345133	0.343434	0.282353	0.384259	0.0265957	0.0078125	0.0176471	0.0432692	0	0	0	0	0	0	0	0.00549451	0.0046729	0.00934579	0	0	0	0	0	0.335098	0.0259366	0	0.00397614	0	0.0928514
rs10509681	0.03125	0.0327869	0	0.00442478	0	0	0	0.117021	0.101562	0.0235294	0.144231	0	0	0.0047619	0	0	0.131313	0.0808081	0.0934066	0.149533	0.130841	0.0174419	0.038835	0.0245098	0.046875	0.0196078	0.00832073	0.0994236	0.000992063	0.11829	0.0296524	0.0457268
rs1056827	0.5	0.540984	0.489899	0.517699	0.560606	0.535294	0.527778	0.43617	0.257812	0.288235	0.25	0.145161	0.237864	0.22381	0.0817308	0.207071	0.277778	0.393939	0.291209	0.261682	0.228972	0.44186	0.456311	0.47549	0.380208	0.465686	0.523449	0.311239	0.179563	0.289264	0.444785	0.36242
rs1056836	0.786458	0.696721	0.838384	0.823009	0.787879	0.864706	0.875	0.265957	0.304688	0.147059	0.375	0.0698925	0.0873786	0.0809524	0.105769	0.111111	0.429293	0.272727	0.406593	0.471963	0.401869	0.168605	0.18932	0.171569	0.166667	0.147059	0.816944	0.276657	0.0912698	0.397614	0.168712	0.385184
rs1057126	0.395833	0.483607	0.510101	0.584071	0.454545	0.588235	0.472222	0.319149	0.484375	0.388235	0.288462	0.5	0.509709	0.590476	0.495192	0.540404	0.186869	0.232323	0.269231	0.224299	0.266355	0.343023	0.300971	0.362745	0.302083	0.372549	0.499244	0.357349	0.527778	0.235586	0.336401	0.400559
rs1057910	0.00520833	0.0163934	0	0	0	0	0	0.0638298	0.0234375	0.0117647	0.0432692	0.0268817	0.038835	0.047619	0.0192308	0.0353535	0.0656566	0.0555556	0.0714286	0.0841121	0.0841121	0.116279	0.131068	0.102941	0.0989583	0.0980392	0.00226929	0.037464	0.0337302	0.0725646	0.109407	0.0485224
rs1057911	0.00520833	0.0245902	0	0.00442478	0.00505051	0	0	0.0638298	0.0234375	0.0117647	0.0432692	0.0268817	0.038835	0.0428571	0.0192308	0.0353535	0.0656566	0.0555556	0.0714286	0.0841121	0.0841121	0.116279	0.131068	0.102941	0.0989583	0.0980392	0.00453858	0.037464	0.0327381	0.0725646	0.109407	0.0489217
rs1058930	0.0104167	0	0.010101	0	0	0	0.00462963	0.0159574	0.0234375	0.0117647	0.0240385	0	0	0	0	0	0.0353535	0.0808081	0.0604396	0.0654206	0.046729	0.00581395	0.00970874	0.00980392	0.0104167	0	0.00378215	0.018732	0	0.0576541	0.00715746	0.0165735
rs1059491	0.296875	0.245902	0.186869	0.172566	0.232323	0.247059	0.189815	0.281915	0.335938	0.705882	0.288462	0.016129	0.121359	0.0571429	0.129808	0.040404	0.343434	0.39899	0.32967	0.271028	0.252336	0.139535	0.242718	0.210784	0.130208	0.107843	0.220877	0.397695	0.0744048	0.317097	0.167689	0.22484
rs1060915	0.203125	0.147541	0.126263	0.225664	0.116162	0.164706	0.125	0.425532	0.382812	0.376471	0.288462	0.5	0.349515	0.37619	0.264423	0.378788	0.358586	0.358586	0.318681	0.373832	0.373832	0.5	0.475728	0.514706	0.463542	0.529412	0.159607	0.364553	0.371032	0.357853	0.496933	0.336262
rs1065852	0.145833	0.155738	0.0909091	0.115044	0.0353535	0.164706	0.106481	0.18617	0.148438	0.0705882	0.177885	0.629032	0.601942	0.614286	0.360577	0.661616	0.242424	0.146465	0.247253	0.172897	0.205607	0.255814	0.150485	0.171569	0.104167	0.151961	0.112708	0.148415	0.571429	0.201789	0.164622	0.238019
rs10789501	0.479167	0.434426	0.555556	0.433628	0.449495	0.535294	0.601852	0.446809	0.421875	0.558824	0.427885	0.94086	0.936893	0.928571	0.947115	0.914141	0.353535	0.363636	0.32967	0.364486	0.331776	0.668605	0.626214	0.563725	0.677083	0.696078	0.501513	0.463977	0.933532	0.348907	0.645194	0.580671
rs10797300	0.0625	0.0655738	0.0909091	0.0309735	0.0858586	0.0529412	0.0787037	0.12234	0.0703125	0.0176471	0.168269	0	0.00485437	0.00952381	0	0.00505051	0.121212	0.0757576	0.137363	0.130841	0.149533	0.0872093	0.0533981	0.0637255	0.114583	0.107843	0.0665658	0.100865	0.00396825	0.12326	0.0848671	0.0736821
rs10807344	0.0364583	0.0655738	0	0.00884956	0.010101	0.0117647	0.00925926	0.218085	0.140625	0.0529412	0.158654	0.150538	0.106796	0.138095	0.115385	0.146465	0.217172	0.227273	0.203297	0.200935	0.214953	0.186047	0.315534	0.230392	0.3125	0.230392	0.0173979	0.145533	0.130952	0.212724	0.256646	0.14397
rs10929302	0.307292	0.327869	0.338384	0.331858	0.358586	0.335294	0.361111	0.329787	0.34375	0.452941	0.326923	0.150538	0.11165	0.114286	0.177885	0.0808081	0.308081	0.338384	0.230769	0.257009	0.238318	0.406977	0.436893	0.397059	0.416667	0.441176	0.338124	0.361671	0.126984	0.274354	0.420245	0.302117
rs10929303	0.458333	0.385246	0.5	0.473451	0.323232	0.329412	0.453704	0.218085	0.203125	0.217647	0.225962	0.112903	0.11165	0.142857	0.129808	0.166667	0.20202	0.136364	0.225275	0.28972	0.280374	0.156977	0.174757	0.191176	0.171875	0.151961	0.422844	0.217579	0.132937	0.228628	0.169734	0.247604
rs11045818	0.0364583	0.0409836	0.00505051	0.00884956	0	0.0117647	0.00462963	0.138298	0.046875	0.0235294	0.125	0	0.00485437	0	0	0.010101	0.20202	0.0757576	0.153846	0.158879	0.130841	0.0406977	0.0291262	0.0441176	0.046875	0	0.0136157	0.0893372	0.00297619	0.144135	0.0316973	0.0517173
rs11045819	0.0885417	0.0655738	0.0707071	0.0575221	0.0252525	0.0647059	0.0509259	0.148936	0.0546875	0.0235294	0.144231	0	0.00485437	0	0	0.010101	0.20202	0.0757576	0.153846	0.158879	0.130841	0.0348837	0.0291262	0.0392157	0.046875	0	0.0597579	0.0994236	0.00297619	0.144135	0.0296524	0.0648962
rs11045852	0.0416667	0.0491803	0.040404	0.00442478	0	0.0117647	0.0509259	0.00531915	0	0	0	0	0	0	0	0	0	0	0	0	0	0.0348837	0.0631068	0.0490196	0.0364583	0.0343137	0.0272315	0.00144092	0	0	0.0439673	0.0159744
rs11045853	0	0.00819672	0	0.00442478	0	0.00588235	0	0	0	0	0	0	0	0	0	0	0	0	0	0	0	0	0	0	0	0	0.00226929	0	0	0	0	0.000599042
rs1105879	0.375	0.344262	0.267677	0.261062	0.308081	0.235294	0.333333	0.335106	0.296875	0.247059	0.317308	0.215054	0.286408	0.242857	0.221154	0.151515	0.343434	0.419192	0.285714	0.294393	0.32243	0.424419	0.475728	0.470588	0.463542	0.495098	0.301815	0.301153	0.224206	0.333002	0.46728	0.324681
rs1105880	0.401042	0.352459	0.343434	0.345133	0.39899	0.329412	0.398148	0.335106	0.296875	0.247059	0.326923	0.215054	0.286408	0.242857	0.221154	0.151515	0.343434	0.419192	0.285714	0.294393	0.32243	0.424419	0.475728	0.470588	0.463542	0.495098	0.368381	0.304035	0.224206	0.333002	0.46728	0.342652
rs111490789	0.00520833	0.0163934	0.0252525	0.0353982	0.00505051	0	0.0185185	0	0	0	0	0	0	0	0	0	0	0	0.00549451	0	0	0	0	0	0	0	0.015885	0	0	0.000994036	0	0.00439297
rs11188072	0.276042	0.204918	0.247475	0.247788	0.181818	0.294118	0.259259	0.12766	0.117188	0.0411765	0.177885	0.016129	0.0242718	0.00952381	0.00480769	0.020202	0.222222	0.217172	0.241758	0.214953	0.224299	0.110465	0.135922	0.142157	0.145833	0.142157	0.24584	0.119597	0.014881	0.223658	0.135992	0.15595
rs112337232	0.0625	0.0737705	0.0808081	0.0619469	0.0909091	0.123529	0.0694444	0.0106383	0.015625	0	0.00961538	0.016129	0.00970874	0.0047619	0.0144231	0.00505051	0	0	0.00549451	0	0.0046729	0.00581395	0	0.0147059	0	0.00490196	0.0794251	0.00864553	0.00992063	0.00198807	0.00511247	0.0255591
rs112339338	0	0	0.00505051	0	0.00505051	0	0	0	0	0	0	0	0	0	0	0	0	0	0	0	0.0046729	0	0	0	0	0	0.00151286	0	0	0.000994036	0	0.000599042
rs113164681	0.00520833	0.0163934	0.0252525	0.0353982	0.00505051	0	0.0185185	0	0	0	0	0	0	0	0	0	0	0	0	0	0	0	0	0	0	0	0.015885	0	0	0	0	0.00419329
rs1135823	0	0	0	0	0	0	0	0	0	0	0	0	0	0	0	0	0	0	0	0	0.0046729	0	0	0	0	0.00490196	0	0	0	0.000994036	0.00102249	0.000399361
rs1135840	0.640625	0.57377	0.661616	0.646018	0.747475	0.764706	0.675926	0.494681	0.398438	0.394118	0.572115	0.752688	0.757282	0.742857	0.5	0.777778	0.565657	0.474747	0.554945	0.551402	0.579439	0.5	0.592233	0.573529	0.427083	0.534314	0.676248	0.475504	0.704365	0.545726	0.527607	0.598842
rs1136703	0.302083	0.221311	0.166667	0.10177	0.207071	0.229412	0.185185	0.265957	0.320312	0.694118	0.293269	0.016129	0.121359	0.052381	0.129808	0.040404	0.333333	0.393939	0.324176	0.266355	0.242991	0.133721	0.228155	0.181373	0.114583	0.0980392	0.197428	0.389049	0.0734127	0.310139	0.152352	0.212859
rs114071557	0	0	0	0	0	0	0.00462963	0	0	0	0	0	0	0	0	0	0	0	0	0	0	0	0	0	0	0	0.00075643	0	0	0	0	0.000199681
rs1142345	0.0520833	0.0983607	0.040404	0.039823	0.116162	0.0764706	0.0601852	0.0212766	0.046875	0.0647059	0.0913462	0.0322581	0.00485437	0.0285714	0.0192308	0.0252525	0.030303	0.0252525	0.032967	0.0420561	0.0140187	0.0290698	0.0242718	0.0196078	0.0104167	0.00490196	0.0665658	0.0576369	0.0218254	0.028827	0.0173824	0.0391374
rs115106679	0	0	0	0	0	0	0	0	0	0	0	0	0	0	0	0	0.00505051	0	0	0	0	0	0	0	0	0	0	0	0	0.000994036	0	0.000199681
rs11568317	0	0	0	0	0	0	0	0	0	0	0	0.0967742	0.00970874	0.0333333	0.0144231	0.0252525	0	0	0	0	0	0	0	0	0	0	0	0	0.0347222	0	0	0.00698882
rs11568732	0.0989583	0.057377	0.0909091	0.0309735	0.0757576	0.0705882	0.0648148	0.0691489	0.0234375	0.0117647	0.0336538	0.102151	0.0873786	0.0904762	0.120192	0.0757576	0.0656566	0.0454545	0.0659341	0.0794393	0.0841121	0.139535	0.135922	0.107843	0.119792	0.107843	0.0695915	0.0360231	0.0952381	0.0685885	0.121677	0.0800719
rs11569679	0.145833	0.0737705	0.166667	0.154867	0.126263	0.188235	0.148148	0.0159574	0.015625	0	0.0240385	0	0	0	0	0	0	0	0	0	0	0	0	0	0	0	0.146747	0.0144092	0	0	0	0.0407348
rs11569680	0.00520833	0.0163934	0.020202	0.00442478	0	0.0117647	0.00462963	0	0	0	0	0	0	0	0	0	0	0	0	0	0	0	0	0	0	0	0.00832073	0	0	0	0	0.00219649
rs11569681	0.078125	0.0327869	0.126263	0.0707965	0.0808081	0.111765	0.0972222	0.00531915	0.015625	0	0.00480769	0	0	0	0	0	0	0	0	0	0	0	0	0	0	0	0.0877458	0.00576369	0	0	0	0.0239617
rs11572080	0.03125	0.0327869	0	0.00442478	0	0	0	0.117021	0.101562	0.0235294	0.144231	0	0	0.0047619	0	0	0.131313	0.0808081	0.0934066	0.149533	0.130841	0.0174419	0.038835	0.0245098	0.046875	0.0196078	0.00832073	0.0994236	0.000992063	0.11829	0.0296524	0.0457268
rs11572103	0.213542	0.147541	0.19697	0.234513	0.136364	0.170588	0.199074	0	0	0.00588235	0.0336538	0	0	0	0	0	0	0	0.00549451	0.0140187	0	0	0.00485437	0.00980392	0.0208333	0.0245098	0.189107	0.0115274	0	0.00397614	0.0122699	0.0547125
rs11683356	0	0.0327869	0	0	0	0	0	0.0212766	0.03125	0.00588235	0.0144231	0	0.00485437	0	0	0	0.020202	0.0454545	0.032967	0.0280374	0.0280374	0.00581395	0	0.00490196	0	0.00980392	0.00302572	0.0172911	0.000992063	0.0308151	0.00408998	0.0103834
rs11692021	0.307292	0.286885	0.232323	0.212389	0.222222	0.241176	0.263889	0.356383	0.265625	0.0823529	0.326923	0.16129	0.271845	0.209524	0.211538	0.121212	0.378788	0.424242	0.340659	0.308411	0.350467	0.389535	0.461165	0.426471	0.411458	0.441176	0.249622	0.263689	0.196429	0.359841	0.427403	0.297724
rs118203757	0	0.00819672	0	0	0	0	0	0	0	0	0	0	0	0	0	0	0	0	0	0	0	0	0	0	0	0	0.00075643	0	0	0	0	0.000199681
rs118203758	0	0	0	0	0	0	0	0	0	0	0	0.0107527	0.00485437	0.0047619	0	0.010101	0	0	0	0	0	0	0	0	0	0	0	0	0.00595238	0	0	0.00119808
rs1208	0.375	0.360656	0.388889	0.438053	0.459596	0.347059	0.37037	0.393617	0.445312	0.276471	0.389423	0.0483871	0.0291262	0.0428571	0.0192308	0.0606061	0.39899	0.429293	0.450549	0.476636	0.434579	0.389535	0.34466	0.367647	0.421875	0.29902	0.394856	0.373199	0.0396825	0.43837	0.362986	0.322883
rs12208357	0.015625	0.0163934	0	0	0	0	0	0.037234	0.015625	0.00588235	0.0192308	0	0	0	0	0	0.0808081	0.0606061	0.0604396	0.0514019	0.0607477	0.0174419	0.0145631	0.0245098	0.015625	0.0294118	0.00378215	0.0201729	0	0.0626243	0.0204499	0.0203674
rs12248560	0.270833	0.196721	0.247475	0.238938	0.176768	0.258824	0.24537	0.12766	0.117188	0.0411765	0.177885	0.016129	0.0242718	0.00952381	0.00480769	0.020202	0.222222	0.217172	0.241758	0.214953	0.224299	0.110465	0.135922	0.142157	0.145833	0.142157	0.23525	0.119597	0.014881	0.223658	0.135992	0.153155
rs12468274	0.0885417	0.0819672	0.106061	0.0486726	0.0757576	0.0352941	0.0833333	0.0691489	0.109375	0.141176	0.0576923	0.301075	0.160194	0.261905	0.134615	0.29798	0.0656566	0.0252525	0.0494505	0.0607477	0.121495	0.215116	0.165049	0.220588	0.203125	0.210784	0.0741301	0.0907781	0.229167	0.0656064	0.202454	0.13099
rs12474980	0.0989583	0.0737705	0.0858586	0.0752212	0.166667	0.0411765	0.0324074	0.170213	0.15625	0.158824	0.134615	0.284946	0.150485	0.252381	0.144231	0.262626	0.217172	0.212121	0.241758	0.196262	0.233645	0.232558	0.23301	0.210784	0.182292	0.230392	0.0824508	0.154179	0.217262	0.219682	0.217791	0.173522
rs12475068	0.0989583	0.0901639	0.121212	0.0575221	0.0808081	0.0352941	0.0833333	0.0851064	0.117188	0.141176	0.0721154	0.317204	0.160194	0.266667	0.134615	0.29798	0.0909091	0.0707071	0.0714286	0.088785	0.154206	0.232558	0.199029	0.235294	0.21875	0.22549	0.080938	0.100865	0.233135	0.0964215	0.221881	0.144968
rs12476197	0.0989583	0.0737705	0.0858586	0.0752212	0.166667	0.0411765	0.0324074	0.170213	0.15625	0.158824	0.134615	0.284946	0.140777	0.252381	0.139423	0.262626	0.217172	0.212121	0.241758	0.196262	0.233645	0.232558	0.23301	0.210784	0.182292	0.230392	0.0824508	0.154179	0.214286	0.219682	0.217791	0.172923
rs12529220	0.71875	0.737705	0.681818	0.632743	0.767677	0.794118	0.75	0.553191	0.4375	0.611765	0.596154	0.354839	0.349515	0.357143	0.4375	0.383838	0.585859	0.540404	0.56044	0.504673	0.504673	0.424419	0.373786	0.470588	0.427083	0.411765	0.72239	0.559078	0.376984	0.537773	0.421268	0.534345
rs12564525	0.21875	0.172131	0.252525	0.190265	0.237374	0.241176	0.25	0.276596	0.273438	0.352941	0.25	0.586022	0.601942	0.619048	0.620192	0.641414	0.237374	0.191919	0.192308	0.191589	0.214953	0.581395	0.524272	0.480392	0.583333	0.578431	0.225416	0.286744	0.614087	0.205765	0.548057	0.371206
rs12571421	0.151042	0.139344	0.207071	0.123894	0.181818	0.158824	0.166667	0.106383	0.125	0.0588235	0.120192	0.263441	0.334951	0.352381	0.322115	0.282828	0.131313	0.217172	0.142857	0.14486	0.0934579	0.325581	0.330097	0.372549	0.34375	0.411765	0.161876	0.102305	0.3125	0.145129	0.357873	0.21885
rs12623271	0.421875	0.352459	0.343434	0.336283	0.409091	0.370588	0.398148	0.420213	0.320312	0.252941	0.365385	0.215054	0.286408	0.242857	0.221154	0.151515	0.39899	0.459596	0.346154	0.336449	0.373832	0.436047	0.485437	0.47549	0.484375	0.495098	0.376702	0.34438	0.224206	0.382704	0.476483	0.36222
rs12718541	0.552083	0.5	0.459596	0.5	0.474747	0.435294	0.467593	0.324468	0.289062	0.447059	0.4375	0.5	0.548544	0.561905	0.533654	0.560606	0.434343	0.469697	0.472527	0.401869	0.425234	0.511628	0.42233	0.5	0.46875	0.529412	0.484115	0.381844	0.541667	0.439364	0.485685	0.472843
rs12720065	0.0208333	0	0.0151515	0.0442478	0.0555556	0	0.0138889	0	0	0	0.00480769	0	0	0	0	0	0	0	0	0	0	0	0	0	0	0	0.0234493	0.00144092	0	0	0	0.00638978
rs12720461	0	0	0	0	0	0	0	0	0	0	0	0	0	0	0	0	0	0	0.00549451	0	0.00934579	0	0	0	0	0	0	0	0	0.00298211	0	0.000599042
rs12721627	0	0	0	0	0	0	0	0	0	0	0	0	0	0	0.0192308	0	0	0	0	0	0	0	0	0	0	0	0	0	0.00396825	0	0	0.000798722
rs12721629	0	0	0.00505051	0	0.020202	0	0	0	0	0	0.00480769	0	0	0	0	0	0	0	0	0	0	0	0	0	0	0	0.00378215	0.00144092	0	0	0	0.00119808
rs12721649	0.161458	0.204918	0.20202	0.29646	0.227273	0.252941	0.268519	0.0106383	0.0234375	0.00588235	0.0288462	0	0	0	0	0	0	0	0	0.0046729	0	0	0	0	0	0	0.233737	0.0172911	0	0.000994036	0	0.0642971
rs12721655	0.00520833	0.00819672	0	0	0	0	0	0	0	0	0	0	0	0	0	0	0.00505051	0	0	0	0	0	0	0	0.00520833	0	0.00151286	0	0	0.000994036	0.00102249	0.000798722
rs12769205	0.171875	0.147541	0.222222	0.163717	0.237374	0.194118	0.222222	0.106383	0.125	0.0647059	0.125	0.263441	0.334951	0.352381	0.322115	0.282828	0.131313	0.217172	0.142857	0.14486	0.0934579	0.325581	0.330097	0.372549	0.34375	0.411765	0.196672	0.105187	0.3125	0.145129	0.357873	0.228435
rs13015720	0.421875	0.352459	0.343434	0.336283	0.409091	0.370588	0.398148	0.420213	0.320312	0.252941	0.365385	0.215054	0.286408	0.242857	0.221154	0.151515	0.39899	0.459596	0.346154	0.336449	0.373832	0.436047	0.485437	0.47549	0.484375	0.495098	0.376702	0.34438	0.224206	0.382704	0.476483	0.36222
rs137852339	0	0	0	0	0	0	0	0	0	0	0	0	0	0	0	0	0	0	0	0	0	0.0116279	0.00970874	0.0196078	0.0208333	0.00980392	0	0	0	0	0.0143149	0.00279553
rs138067	0.473958	0.508197	0.313131	0.464602	0.378788	0.405882	0.458333	0.468085	0.5	0.705882	0.451923	0.435484	0.601942	0.580952	0.552885	0.515152	0.414141	0.459596	0.39011	0.38785	0.443925	0.465116	0.446602	0.495098	0.526042	0.558824	0.42587	0.527378	0.539683	0.419483	0.498978	0.475839
rs138079	0.0677083	0.0491803	0.0454545	0.0486726	0.0606061	0.0352941	0.0416667	0.170213	0.078125	0.0117647	0.158654	0.0107527	0	0.0047619	0.0144231	0.0252525	0.121212	0.10101	0.175824	0.186916	0.135514	0.0174419	0.0436893	0.0147059	0.0625	0.0294118	0.0499244	0.110951	0.0109127	0.144135	0.0337423	0.0662939
rs138099	0.40625	0.319672	0.262626	0.429204	0.323232	0.282353	0.412037	0.212766	0.078125	0.0470588	0.245192	0.0483871	0.0631068	0.0761905	0.105769	0.0505051	0.217172	0.227273	0.192308	0.252336	0.205607	0.232558	0.257282	0.22549	0.302083	0.338235	0.353253	0.157061	0.0694444	0.219682	0.271984	0.226238
rs138100349	0	0	0	0	0	0	0	0	0	0	0	0	0	0	0	0	0	0.00505051	0.00549451	0	0.0046729	0	0	0	0	0	0	0	0	0.00298211	0	0.000599042
rs138102	0.401042	0.319672	0.262626	0.433628	0.29798	0.288235	0.412037	0.212766	0.078125	0.0470588	0.245192	0.0483871	0.0631068	0.0761905	0.105769	0.0505051	0.217172	0.227273	0.192308	0.252336	0.205607	0.226744	0.257282	0.220588	0.302083	0.338235	0.350227	0.157061	0.0694444	0.219682	0.269939	0.22504
rs138110	0.505208	0.565574	0.368687	0.495575	0.444444	0.435294	0.513889	0.473404	0.5	0.705882	0.456731	0.435484	0.601942	0.580952	0.552885	0.515152	0.414141	0.459596	0.384615	0.392523	0.434579	0.465116	0.451456	0.5	0.53125	0.558824	0.472012	0.530259	0.539683	0.417495	0.502045	0.488618
rs138652540	0	0	0	0	0	0	0	0	0	0	0.00480769	0	0	0	0	0	0	0	0	0	0	0	0	0	0	0	0	0.00144092	0	0	0	0.000199681
rs138707146	0	0	0	0.00884956	0	0.00588235	0	0	0	0	0	0	0	0	0	0	0	0	0	0	0	0	0	0	0	0	0.00226929	0	0	0	0	0.000599042
rs138870349	0.00520833	0	0.00505051	0	0	0	0	0	0	0	0	0	0	0	0.00480769	0	0	0	0	0	0	0	0	0	0	0	0.00151286	0	0.000992063	0	0	0.000599042
rs139029625	0	0.00819672	0.00505051	0.0309735	0.0151515	0.0176471	0.00462963	0	0	0	0	0	0	0	0	0	0	0	0	0	0	0	0	0	0	0	0.0121029	0	0	0	0	0.00319489
rs139351995	0.00520833	0	0.00505051	0	0	0.00588235	0.00462963	0	0	0	0	0	0	0	0	0	0	0	0	0	0	0	0	0	0	0	0.00302572	0	0	0	0	0.000798722
rs139801276	0	0.00819672	0.00505051	0.00884956	0.0151515	0.0176471	0.00462963	0	0	0	0	0	0	0	0	0	0	0	0	0	0	0	0	0	0	0	0.00832073	0	0	0	0	0.00219649
rs140278421	0.00520833	0	0	0	0	0	0	0.00531915	0	0	0	0	0	0	0	0	0	0	0	0	0	0	0	0	0	0	0.00075643	0.00144092	0	0	0	0.000399361
rs140513104	0	0	0	0	0	0	0	0	0	0	0	0.00537634	0	0	0	0	0	0	0	0	0	0	0	0	0	0	0	0	0.000992063	0	0	0.000199681
rs140790673	0	0	0	0	0	0	0	0	0	0	0	0	0.00485437	0.0047619	0	0	0	0	0	0	0	0	0	0	0	0	0	0	0.00198413	0	0	0.000399361
rs14158	0.192708	0.106557	0.121212	0.216814	0.0808081	0.170588	0.171296	0.191489	0.257812	0.223529	0.216346	0.435484	0.402913	0.357143	0.461538	0.39899	0.262626	0.242424	0.203297	0.247664	0.17757	0.215116	0.121359	0.161765	0.197917	0.186275	0.155068	0.21902	0.410714	0.22664	0.174847	0.233626
rs143193369	0	0	0	0	0.010101	0	0	0	0	0	0	0	0	0	0	0	0	0	0	0	0	0	0	0	0	0	0.00151286	0	0	0	0	0.000399361
rs1433099	0.526042	0.57377	0.70202	0.619469	0.626263	0.658824	0.601852	0.234043	0.164062	0.129412	0.254808	0.231183	0.271845	0.309524	0.240385	0.222222	0.287879	0.252525	0.324176	0.280374	0.317757	0.325581	0.330097	0.348039	0.270833	0.303922	0.617247	0.201729	0.255952	0.292247	0.315951	0.362819
rs143690364	0	0	0	0	0.00505051	0	0	0	0	0	0	0	0	0	0	0	0	0	0	0	0	0	0	0	0	0	0.00075643	0	0	0	0	0.000199681
rs144036596	0	0	0	0	0	0	0	0	0	0.00588235	0	0	0	0	0	0	0	0	0	0	0	0	0	0	0	0	0	0.00144092	0	0	0	0.000199681
rs144041067	0	0	0	0	0	0	0	0	0	0	0	0	0	0	0	0	0	0.010101	0	0	0	0	0	0	0	0	0	0	0	0.00198807	0	0.000399361
rs144148965	0	0	0	0	0.00505051	0	0	0	0	0	0	0	0	0	0	0	0	0	0	0	0	0	0	0	0	0	0.00075643	0	0	0	0	0.000199681
rs144315434	0.15625	0.0655738	0.0909091	0.0752212	0.146465	0.0941176	0.0833333	0.0478723	0.0390625	0.0176471	0.0528846	0	0.00485437	0	0	0	0.0454545	0.0252525	0.043956	0.0794393	0.126168	0.0465116	0.0485437	0.0735294	0.0572917	0.0392157	0.102874	0.0403458	0.000992063	0.0656064	0.0531697	0.0565096
rs1451371	0.802083	0.713115	0.717172	0.628319	0.666667	0.688235	0.763889	0.446809	0.398438	0.5	0.524038	0.505376	0.553398	0.566667	0.543269	0.570707	0.580808	0.590909	0.648352	0.551402	0.607477	0.616279	0.626214	0.661765	0.65625	0.681373	0.710287	0.474063	0.548611	0.594433	0.649284	0.609824
rs145328984	0	0	0.00505051	0	0	0	0	0	0	0	0	0	0	0	0	0	0	0	0	0	0	0	0	0	0	0	0.00075643	0	0	0	0	0.000199681
rs145884402	0	0.00819672	0.00505051	0.00884956	0.0151515	0.0176471	0.00462963	0	0	0	0	0	0	0	0	0	0	0	0	0	0	0	0	0	0	0	0.00832073	0	0	0	0	0.00219649
rs146727732	0	0.00819672	0	0	0	0	0	0	0	0	0	0	0	0	0	0	0	0	0	0	0	0	0	0	0.00520833	0	0.00075643	0	0	0	0.00102249	0.000399361
rs148583958	0	0.00819672	0	0	0	0	0	0	0	0	0.0240385	0	0.00485437	0	0	0	0	0	0	0.0046729	0.0046729	0.00581395	0	0	0.0104167	0.0196078	0.00075643	0.00720461	0.000992063	0.00198807	0.00715746	0.00319489
rs148769737	0.00520833	0	0	0	0	0	0	0	0	0	0	0	0	0	0	0	0	0	0	0	0	0	0	0	0	0	0.00075643	0	0	0	0	0.000199681
rs149928755	0	0	0	0	0.00505051	0	0	0	0	0	0	0	0	0	0	0	0	0	0	0	0	0	0	0	0	0	0.00075643	0	0	0	0	0.000199681
rs15561	0.4375	0.483607	0.520202	0.597345	0.489899	0.623529	0.486111	0.345745	0.523438	0.4	0.3125	0.526882	0.543689	0.604762	0.528846	0.550505	0.247475	0.257576	0.32967	0.266355	0.303738	0.389535	0.417476	0.436275	0.338542	0.446078	0.52118	0.381844	0.551587	0.280318	0.406953	0.4373
rs16940	0.203125	0.147541	0.126263	0.216814	0.116162	0.158824	0.125	0.425532	0.382812	0.388235	0.288462	0.5	0.349515	0.37619	0.264423	0.378788	0.358586	0.358586	0.318681	0.35514	0.369159	0.5	0.480583	0.514706	0.463542	0.529412	0.157337	0.367435	0.371032	0.352883	0.497955	0.335264
rs16941	0.203125	0.147541	0.126263	0.216814	0.116162	0.158824	0.125	0.425532	0.382812	0.376471	0.288462	0.5	0.349515	0.37619	0.264423	0.378788	0.358586	0.358586	0.318681	0.373832	0.369159	0.5	0.480583	0.514706	0.463542	0.529412	0.157337	0.364553	0.371032	0.356859	0.497955	0.335663
rs16942	0.25	0.245902	0.166667	0.243363	0.227273	0.223529	0.180556	0.441489	0.382812	0.376471	0.307692	0.5	0.349515	0.37619	0.264423	0.378788	0.358586	0.358586	0.318681	0.35514	0.378505	0.5	0.480583	0.514706	0.463542	0.529412	0.217852	0.37464	0.371032	0.354871	0.497955	0.352636
rs16947	0.494792	0.418033	0.565657	0.535398	0.646465	0.611765	0.560185	0.308511	0.257812	0.323529	0.389423	0.129032	0.165049	0.133333	0.139423	0.131313	0.323232	0.323232	0.307692	0.378505	0.373832	0.25	0.441748	0.401961	0.317708	0.377451	0.553707	0.327089	0.139881	0.342942	0.361963	0.359225
rs16969968	0.0833333	0.0737705	0	0.00884956	0.0151515	0.00588235	0	0.345745	0.1875	0.0647059	0.216346	0.0215054	0.0291262	0.0428571	0.0192308	0.020202	0.383838	0.30303	0.28022	0.471963	0.373832	0.145349	0.203883	0.171569	0.208333	0.176471	0.0234493	0.208934	0.0267857	0.365805	0.182004	0.149561
rs17036058	0.015625	0.00819672	0.010101	0	0.020202	0.0235294	0	0.0212766	0	0.00588235	0.00480769	0	0	0	0	0.00505051	0.0252525	0.00505051	0.0274725	0.0046729	0.0046729	0	0.0291262	0.0196078	0.00520833	0.0343137	0.01059	0.00864553	0.000992063	0.0129225	0.0184049	0.0103834
rs17036104	0.015625	0.00819672	0.0151515	0.039823	0.0505051	0.0235294	0.0231481	0.0691489	0.0234375	0	0.0288462	0.215054	0.11165	0.0952381	0.0480769	0.116162	0.040404	0.0353535	0.0384615	0.102804	0.0700935	0.0581395	0.0533981	0.0490196	0.03125	0.0343137	0.026475	0.0317003	0.115079	0.0586481	0.0449898	0.0551118
rs17222723	0.0364583	0.0409836	0.0454545	0.0353982	0.0808081	0.0882353	0.0648148	0.0265957	0.046875	0.0176471	0.0576923	0	0	0	0	0	0.0656566	0.020202	0.043956	0.0841121	0.126168	0.0174419	0.0145631	0.00980392	0.0104167	0.0343137	0.0559758	0.037464	0	0.0695825	0.0173824	0.0373403
rs17238540	0.09375	0.0983607	0.116162	0.159292	0.0909091	0.0882353	0.0972222	0.037234	0.0390625	0.00588235	0.0192308	0	0	0	0	0	0.0151515	0.00505051	0.021978	0.00934579	0.0327103	0	0	0	0	0.00490196	0.108169	0.0244957	0	0.0168986	0.00102249	0.0355431
rs17244841	0.104167	0.0983607	0.121212	0.159292	0.0858586	0.0764706	0.0925926	0.0478723	0.0390625	0.00588235	0.0144231	0	0	0.00952381	0.0192308	0	0.0151515	0.00505051	0.0274725	0.00934579	0.0327103	0	0	0	0	0.00490196	0.107413	0.0259366	0.00595238	0.0178926	0.00102249	0.0369409
rs17708472	0.0625	0.0737705	0.00505051	0.0221239	0.0606061	0.00588235	0.0185185	0.180851	0.148438	0.0411765	0.177885	0.0107527	0	0	0	0.00505051	0.252525	0.277778	0.214286	0.261682	0.163551	0.0581395	0.15534	0.0735294	0.109375	0.0588235	0.0332829	0.139769	0.00297619	0.233598	0.0920245	0.0936502
rs17854828	0.145833	0.0901639	0.19697	0.10177	0.207071	0.170588	0.106481	0.106383	0.0390625	0.0294118	0.0769231	0.188172	0.0679612	0.119048	0.0336538	0.136364	0.171717	0.136364	0.181319	0.154206	0.14486	0.0406977	0.0631068	0.0343137	0.0677083	0.0539216	0.146747	0.0662824	0.107143	0.157058	0.0521472	0.111222
rs17861157	0.0885417	0.0655738	0.10101	0.128319	0.0959596	0.0352941	0.087963	0	0	0.00588235	0.00480769	0	0	0	0	0	0	0	0	0	0	0	0	0	0	0	0.0892587	0.00288184	0	0	0	0.0239617
rs17862868	0.0989583	0.0901639	0.121212	0.0575221	0.0808081	0.0352941	0.0833333	0.0851064	0.117188	0.141176	0.0721154	0.317204	0.160194	0.266667	0.134615	0.29798	0.0909091	0.0707071	0.0714286	0.088785	0.154206	0.226744	0.199029	0.235294	0.208333	0.220588	0.080938	0.100865	0.233135	0.0964215	0.217791	0.144169
rs17863762	0	0	0	0	0	0	0	0.0319149	0	0.00588235	0.00961538	0	0	0	0	0	0.030303	0.00505051	0.010989	0.0327103	0.0186916	0	0	0	0	0	0	0.0129683	0	0.0198807	0	0.00579073
rs17863778	0.614583	0.565574	0.560606	0.579646	0.717172	0.670588	0.560185	0.601064	0.484375	0.411765	0.514423	0.5	0.427184	0.495238	0.360577	0.414141	0.616162	0.671717	0.587912	0.537383	0.607477	0.668605	0.718447	0.686275	0.666667	0.72549	0.609682	0.507205	0.438492	0.60338	0.694274	0.576278
rs17863783	0.114583	0.0655738	0.111111	0.137168	0.181818	0.135294	0.134259	0.0638298	0.0546875	0.170588	0.0384615	0.0537634	0.0145631	0.0333333	0.00961538	0.030303	0.020202	0.0353535	0.00549451	0.0280374	0.0233645	0.0465116	0.0242718	0.0490196	0.0729167	0.0539216	0.129349	0.0806916	0.0277778	0.0228628	0.0490798	0.0650958
rs17868322	0	0.0327869	0	0	0	0	0	0.0212766	0.03125	0.00588235	0.0144231	0	0.00485437	0	0	0	0.020202	0.0454545	0.032967	0.0233645	0.0280374	0.00581395	0	0.00490196	0	0.00980392	0.00302572	0.0172911	0.000992063	0.0298211	0.00408998	0.0101837
rs17868323	0.614583	0.565574	0.560606	0.579646	0.717172	0.670588	0.560185	0.601064	0.484375	0.411765	0.514423	0.5	0.427184	0.495238	0.360577	0.414141	0.616162	0.671717	0.587912	0.537383	0.607477	0.668605	0.718447	0.686275	0.666667	0.72549	0.609682	0.507205	0.438492	0.60338	0.694274	0.576278
rs17868324	0.614583	0.565574	0.560606	0.579646	0.717172	0.670588	0.560185	0.601064	0.484375	0.411765	0.514423	0.5	0.427184	0.495238	0.360577	0.414141	0.616162	0.671717	0.587912	0.537383	0.607477	0.668605	0.718447	0.686275	0.666667	0.72549	0.609682	0.507205	0.438492	0.60338	0.694274	0.576278
rs17868336	0.00520833	0	0	0	0	0	0	0.0531915	0.015625	0.00588235	0.0144231	0	0	0	0	0	0.0252525	0.00505051	0.0384615	0.046729	0.0373832	0.00581395	0	0	0.0104167	0	0.00075643	0.0230548	0	0.0308151	0.00306748	0.0101837
rs17878459	0.00520833	0.00819672	0.010101	0	0	0	0.00462963	0.00531915	0.015625	0.00588235	0	0	0	0	0	0	0.0252525	0.0606061	0.0494505	0.0233645	0.0233645	0	0	0	0	0	0.00378215	0.00576369	0	0.0357853	0	0.00898562
rs17878649	0.0364583	0.0163934	0.0151515	0.0309735	0.0353535	0.0352941	0.0277778	0.00531915	0	0	0.00480769	0.0752688	0.0436893	0.047619	0.0721154	0.040404	0	0	0	0	0	0.0232558	0.00485437	0.00490196	0.015625	0.0147059	0.0287443	0.00288184	0.0555556	0	0.0122699	0.0215655
rs17878739	0.00520833	0.0163934	0.0252525	0.0353982	0.00505051	0	0.0185185	0	0	0	0	0	0	0	0	0	0	0	0	0	0	0	0	0	0	0	0.015885	0	0	0	0	0.00419329
rs17879685	0.03125	0.00819672	0	0.0265487	0.040404	0.00588235	0.0185185	0	0	0	0.00961538	0	0	0	0	0	0	0	0	0	0	0	0	0	0	0	0.0196672	0.00288184	0	0	0	0.00559105
rs17879992	0.135417	0.0655738	0.111111	0.0663717	0.116162	0.0764706	0.101852	0.0691489	0.0234375	0.0117647	0.0432692	0.102151	0.0873786	0.0904762	0.120192	0.0757576	0.0656566	0.0454545	0.0659341	0.0841121	0.0841121	0.139535	0.135922	0.107843	0.119792	0.107843	0.0975794	0.0389049	0.0952381	0.0695825	0.121677	0.0880591
rs17880887	0.078125	0.0901639	0.00505051	0.0265487	0.0656566	0.00588235	0.0231481	0.223404	0.171875	0.0705882	0.221154	0.0107527	0	0	0	0.00505051	0.338384	0.323232	0.324176	0.350467	0.271028	0.0813953	0.199029	0.0784314	0.135417	0.0735294	0.0393343	0.175793	0.00297619	0.321074	0.114519	0.122204
rs17881535	0.0625	0.0737705	0.00505051	0.0221239	0.0606061	0.00588235	0.0185185	0.180851	0.148438	0.0411765	0.177885	0.0107527	0	0	0	0.00505051	0.252525	0.277778	0.21978	0.261682	0.163551	0.0581395	0.15534	0.0735294	0.109375	0.0588235	0.0332829	0.139769	0.00297619	0.234592	0.0920245	0.0938498
rs17882687	0.0104167	0.0163934	0.0252525	0.0353982	0.00505051	0	0.0185185	0	0	0	0	0	0	0	0	0	0	0	0	0	0	0	0.00485437	0	0	0	0.0166415	0	0	0	0.00102249	0.00459265
rs17884712	0.00520833	0.00819672	0.010101	0.0132743	0.010101	0.0176471	0.00462963	0	0	0	0.00480769	0	0	0	0	0	0	0	0	0	0	0	0	0	0	0	0.00983359	0.00144092	0	0	0	0.00279553
rs17885098	0.848958	0.909836	0.883838	0.90708	0.878788	0.923529	0.893519	0.930851	0.976562	0.988235	0.956731	0.892473	0.912621	0.909524	0.879808	0.924242	0.919192	0.954545	0.934066	0.920561	0.915888	0.860465	0.864078	0.887255	0.880208	0.892157	0.891074	0.961095	0.90377	0.928429	0.877301	0.908147
rs17886522	0.0364583	0.0163934	0.0151515	0.0309735	0.040404	0.0352941	0.0277778	0.00531915	0	0	0	0.0752688	0.0436893	0.047619	0.0721154	0.040404	0	0	0	0	0	0.0232558	0.00485437	0.00490196	0.015625	0.0147059	0.0295008	0.00144092	0.0555556	0	0.0122699	0.0215655
rs1799814	0.0208333	0	0	0	0	0	0	0.0265957	0.0234375	0.00588235	0.0625	0	0	0	0	0	0.0252525	0.00505051	0.0384615	0.0841121	0.0140187	0	0.00485437	0.0147059	0.0104167	0.0147059	0.00302572	0.0317003	0	0.0337972	0.00920245	0.013778
rs1799853	0.0260417	0.0409836	0	0.00442478	0	0	0	0.12234	0.101562	0.0235294	0.139423	0	0	0.0047619	0	0	0.151515	0.0808081	0.0879121	0.140187	0.154206	0.0174419	0.0485437	0.0245098	0.0520833	0.0294118	0.00832073	0.0994236	0.000992063	0.124254	0.0347648	0.0479233
rs1799929	0.244792	0.262295	0.186869	0.283186	0.328283	0.188235	0.171296	0.37234	0.375	0.264706	0.365385	0.0483871	0.0291262	0.0380952	0.0192308	0.0505051	0.414141	0.429293	0.445055	0.457944	0.429907	0.348837	0.300971	0.313725	0.380208	0.269608	0.237519	0.34438	0.0367063	0.435388	0.321063	0.267971
rs1799930	0.260417	0.286885	0.262626	0.185841	0.272727	0.223529	0.199074	0.239362	0.132812	0.0823529	0.206731	0.225806	0.199029	0.252381	0.254808	0.348485	0.29798	0.262626	0.274725	0.294393	0.280374	0.267442	0.38835	0.343137	0.364583	0.421569	0.237519	0.17147	0.255952	0.282306	0.359918	0.264976
rs1799931	0.0364583	0.0491803	0.0151515	0.0176991	0.010101	0.0470588	0.037037	0.0691489	0.140625	0.176471	0.0817308	0.268817	0.165049	0.185714	0.100962	0.186869	0.00505051	0.0353535	0.021978	0.0327103	0.0186916	0.0988372	0.0533981	0.0588235	0.0572917	0.0784314	0.0287443	0.112392	0.179563	0.0228628	0.0685072	0.0772764
rs1799949	0.234375	0.221311	0.166667	0.243363	0.217172	0.223529	0.171296	0.43617	0.367188	0.358824	0.264423	0.5	0.349515	0.37619	0.264423	0.378788	0.287879	0.318182	0.269231	0.28972	0.331776	0.5	0.470874	0.519608	0.463542	0.529412	0.210287	0.353026	0.371032	0.300199	0.496933	0.336462
rs1799966	0.255208	0.245902	0.171717	0.256637	0.227273	0.235294	0.194444	0.441489	0.382812	0.376471	0.307692	0.5	0.349515	0.380952	0.264423	0.378788	0.358586	0.358586	0.318681	0.373832	0.383178	0.5	0.475728	0.514706	0.46875	0.529412	0.225416	0.37464	0.372024	0.359841	0.497955	0.355831
rs1800440	0.0260417	0.0163934	0.00505051	0	0.00505051	0	0	0.138298	0.078125	0.0411765	0.230769	0	0.00970874	0.0047619	0.00961538	0	0.20202	0.161616	0.197802	0.17757	0.238318	0.168605	0.218447	0.151961	0.25	0.215686	0.00680787	0.131124	0.00496032	0.195825	0.201431	0.0996406
rs1800460	0.00520833	0.0245902	0	0	0	0	0	0.0106383	0.0390625	0.0647059	0.0480769	0	0	0	0	0	0.030303	0.0252525	0.0274725	0.0420561	0.0140187	0.0174419	0	0	0	0.00490196	0.00302572	0.0403458	0	0.027833	0.00408998	0.0127796
rs1800462	0	0.00819672	0	0	0	0	0	0.0106383	0	0.00588235	0.00480769	0	0	0	0	0	0	0	0.010989	0.00934579	0.00934579	0	0	0	0	0	0.00075643	0.00576369	0	0.00596421	0	0.00219649
rs1801159	0.135417	0.147541	0.186869	0.079646	0.30303	0.0705882	0.148148	0.18617	0.226562	0.470588	0.197115	0.27957	0.26699	0.238095	0.259615	0.287879	0.156566	0.141414	0.17033	0.214953	0.247664	0.0988372	0.101942	0.0539216	0.09375	0.0686275	0.153555	0.266571	0.265873	0.187873	0.0828221	0.184904
rs1801160	0.015625	0.0163934	0.00505051	0.039823	0.0606061	0.0117647	0.0138889	0.0744681	0.046875	0.0176471	0.0721154	0.0215054	0	0.0238095	0.00961538	0.020202	0.0606061	0.0353535	0.0384615	0.046729	0.0654206	0.0581395	0.0728155	0.0735294	0.104167	0.122549	0.0242057	0.054755	0.014881	0.0497018	0.0869121	0.0439297
rs1801252	0.21875	0.172131	0.217172	0.230088	0.30303	0.311765	0.208333	0.164894	0.257812	0.382353	0.216346	0.139785	0.145631	0.119048	0.144231	0.156566	0.121212	0.181818	0.120879	0.126168	0.088785	0.156977	0.131068	0.107843	0.166667	0.107843	0.239032	0.25072	0.140873	0.127237	0.132924	0.177716
rs1801253	0.453125	0.368852	0.469697	0.455752	0.308081	0.447059	0.476852	0.25	0.171875	0.105882	0.230769	0.204301	0.213592	0.238095	0.182692	0.222222	0.328283	0.338384	0.296703	0.266355	0.345794	0.30814	0.228155	0.254902	0.276042	0.269608	0.429652	0.194524	0.212302	0.315109	0.265849	0.298323
rs1801265	0.390625	0.483607	0.429293	0.464602	0.5	0.394118	0.435185	0.234043	0.242188	0.164706	0.254808	0.145161	0.0679612	0.0714286	0.0576923	0.0959596	0.156566	0.29798	0.181319	0.214953	0.219626	0.19186	0.325243	0.308824	0.296875	0.196078	0.441755	0.224784	0.0863095	0.214712	0.265849	0.260184
rs1801267	0	0	0	0	0	0	0	0	0	0	0	0	0	0	0	0	0	0	0	0	0	0	0	0.00490196	0	0	0	0	0	0	0.00102249	0.000199681
rs1801272	0	0.00819672	0	0	0	0	0	0	0.015625	0.0117647	0.00480769	0	0	0	0	0	0.0353535	0.020202	0.0274725	0.0373832	0.046729	0.0116279	0.00970874	0	0	0.00980392	0.00075643	0.00720461	0	0.0337972	0.00613497	0.0091853
rs1801279	0.078125	0.0737705	0.126263	0.141593	0.0909091	0.0705882	0.115741	0.00531915	0	0	0.00480769	0	0	0	0	0	0	0	0	0	0.0046729	0	0	0	0	0	0.102874	0.00288184	0	0.000994036	0	0.0277556
rs1801280	0.28125	0.311475	0.272727	0.336283	0.358586	0.241176	0.240741	0.388298	0.382812	0.276471	0.394231	0.0483871	0.0291262	0.0380952	0.0192308	0.0555556	0.424242	0.454545	0.467033	0.471963	0.429907	0.360465	0.34466	0.343137	0.411458	0.279412	0.291982	0.361671	0.0376984	0.449304	0.346626	0.292732
rs1809810	0.00520833	0	0	0.00442478	0.010101	0.0176471	0.00462963	0.0212766	0.015625	0.0117647	0.0144231	0.0107527	0.00970874	0.0047619	0.00961538	0.020202	0.00505051	0.0252525	0.021978	0.0140187	0.0140187	0.0174419	0.0145631	0.0245098	0.0364583	0.0196078	0.00605144	0.0158501	0.0109127	0.0159046	0.0224949	0.0135783
rs181297724	0	0	0	0	0	0	0	0	0	0	0	0	0	0.0047619	0.00961538	0	0	0.0505051	0	0	0	0	0	0	0	0	0	0	0.00297619	0.00994036	0	0.00259585
rs182132442	0	0	0	0	0	0	0	0	0	0	0	0	0.00485437	0.0047619	0	0.00505051	0	0.00505051	0	0	0	0	0	0	0	0	0	0	0.00297619	0.000994036	0	0.000798722
rs186335453	0	0	0	0	0.010101	0	0	0	0	0	0	0	0	0	0	0	0	0	0	0	0	0	0	0	0	0	0.00151286	0	0	0	0	0.000399361
rs1885301	0.395833	0.409836	0.409091	0.482301	0.393939	0.488235	0.407407	0.441489	0.476562	0.264706	0.495192	0.231183	0.262136	0.257143	0.221154	0.267677	0.414141	0.393939	0.428571	0.46729	0.495327	0.430233	0.359223	0.362745	0.302083	0.367647	0.427383	0.420749	0.248016	0.441352	0.362986	0.380591
rs1902023	0.411458	0.360656	0.419192	0.446903	0.308081	0.382353	0.430556	0.473404	0.273438	0.305882	0.471154	0.44086	0.42233	0.42381	0.432692	0.393939	0.550505	0.484848	0.543956	0.485981	0.504673	0.447674	0.553398	0.553922	0.494792	0.637255	0.397882	0.394813	0.422619	0.512922	0.5409	0.453474
rs192154563	0	0	0	0	0.00505051	0	0	0	0	0	0	0	0	0	0	0	0	0	0	0	0	0	0	0	0	0	0.00075643	0	0	0	0	0.000199681
rs1983023	0.697917	0.647541	0.767677	0.747788	0.732323	0.723529	0.763889	0.414894	0.40625	0.464706	0.418269	0.155914	0.106796	0.114286	0.168269	0.0858586	0.363636	0.393939	0.32967	0.331776	0.32243	0.406977	0.461165	0.416667	0.458333	0.460784	0.731467	0.426513	0.125992	0.347913	0.441718	0.433706
rs199523631	0	0	0	0	0	0	0	0	0	0	0	0	0	0	0	0	0	0.00505051	0	0	0	0	0	0	0	0	0	0	0	0.000994036	0	0.000199681
rs199826652	0	0	0	0	0	0	0	0.0159574	0.015625	0	0.00961538	0	0	0	0	0	0.020202	0	0.010989	0.0046729	0.00934579	0.0174419	0.00485437	0	0	0	0	0.0100865	0	0.00894632	0.00408998	0.00399361
rs200591577	0	0	0	0	0	0	0	0	0	0	0	0	0	0	0	0	0.00505051	0	0	0	0	0	0	0	0	0	0	0	0	0.000994036	0	0.000199681
rs2008584	0.734375	0.672131	0.80303	0.823009	0.80303	0.794118	0.810185	0.478723	0.507812	0.6	0.480769	0.456989	0.26699	0.37619	0.302885	0.388889	0.434343	0.419192	0.379121	0.392523	0.443925	0.622093	0.626214	0.637255	0.651042	0.671569	0.784418	0.514409	0.356151	0.414513	0.642127	0.558706
rs2008595	0.848958	0.754098	0.909091	0.933628	0.883838	0.935294	0.902778	0.494681	0.515625	0.605882	0.485577	0.456989	0.26699	0.37619	0.302885	0.393939	0.434343	0.419192	0.379121	0.397196	0.443925	0.627907	0.626214	0.637255	0.651042	0.671569	0.888805	0.523055	0.357143	0.415507	0.643149	0.588059
rs200965026	0	0	0	0	0	0	0	0	0	0	0.00480769	0	0	0.0047619	0	0	0	0	0	0	0	0	0	0	0	0	0	0.00144092	0.000992063	0	0	0.000399361
rs2011219	0.0625	0.057377	0.0555556	0.0265487	0.0555556	0.0235294	0.0277778	0.0691489	0.109375	0.141176	0.0625	0.301075	0.160194	0.261905	0.134615	0.29798	0.0707071	0.0252525	0.0494505	0.0654206	0.121495	0.215116	0.169903	0.220588	0.197917	0.210784	0.0431165	0.092219	0.229167	0.0675944	0.202454	0.123403
rs2011404	0.0260417	0.0901639	0.0252525	0.00884956	0.0151515	0	0.0185185	0.101064	0.101562	0.0823529	0.149038	0.016129	0.0194175	0.0190476	0.00961538	0.0656566	0.146465	0.151515	0.197802	0.228972	0.200935	0.168605	0.101942	0.186275	0.130208	0.137255	0.0226929	0.110951	0.0257937	0.185885	0.144172	0.0920527
rs2011425	0.09375	0.0819672	0.10101	0.0619469	0.0808081	0.0352941	0.0833333	0.0797872	0.125	0.135294	0.0769231	0.268817	0.15534	0.242857	0.134615	0.247475	0.0858586	0.0606061	0.0714286	0.088785	0.158879	0.226744	0.203883	0.235294	0.208333	0.230392	0.0771558	0.100865	0.208333	0.0944334	0.220859	0.138379
rs2012736	0.0989583	0.0901639	0.121212	0.0575221	0.0808081	0.0352941	0.0833333	0.0851064	0.117188	0.141176	0.0721154	0.317204	0.160194	0.266667	0.134615	0.29798	0.0909091	0.0707071	0.0714286	0.088785	0.154206	0.226744	0.199029	0.235294	0.208333	0.220588	0.080938	0.100865	0.233135	0.0964215	0.217791	0.144169
rs2031920	0	0.0163934	0	0	0	0	0	0.111702	0.15625	0.158824	0.0576923	0.16129	0.237864	0.2	0.192308	0.217172	0.0606061	0.040404	0.0274725	0.0233645	0.0514019	0.0116279	0.00970874	0.00980392	0.0104167	0.00490196	0.00151286	0.115274	0.202381	0.0407555	0.00920245	0.0670927
rs2046934	0.130208	0.139344	0.151515	0.106195	0.10101	0.1	0.162037	0.12766	0.109375	0.0705882	0.0961538	0.112903	0.203883	0.157143	0.149038	0.131313	0.20202	0.166667	0.225275	0.158879	0.121495	0.151163	0.101942	0.0735294	0.130208	0.0539216	0.12708	0.100865	0.151786	0.172962	0.100204	0.132388
rs2056899	0.932292	0.803279	0.994949	0.955752	0.914141	0.976471	0.976852	0.473404	0.46875	0.594118	0.490385	0.962366	0.995146	0.980952	1	0.959596	0.414141	0.424242	0.357143	0.429907	0.38785	0.709302	0.635922	0.612745	0.713542	0.740196	0.944024	0.507205	0.980159	0.403579	0.680982	0.730831
rs2056900	0.1875	0.155738	0.247475	0.190265	0.186869	0.223529	0.240741	0.234043	0.257812	0.223529	0.221154	0.5	0.538835	0.533333	0.591346	0.606061	0.227273	0.186869	0.186813	0.17757	0.186916	0.505814	0.514563	0.45098	0.557292	0.509804	0.207262	0.231988	0.554563	0.192843	0.507157	0.336262
rs2069514	0.322917	0.286885	0.333333	0.300885	0.318182	0.294118	0.324074	0.260638	0.382812	0.682353	0.177885	0.344086	0.276699	0.271429	0.230769	0.287879	0.020202	0.0353535	0.010989	0.00934579	0.0233645	0.0988372	0.0582524	0.0539216	0.078125	0.112745	0.313162	0.361671	0.280754	0.0198807	0.0797546	0.208866
rs2069526	0.0989583	0.131148	0.106061	0.168142	0.0808081	0.123529	0.148148	0.0265957	0.046875	0.0294118	0.00480769	0.0806452	0.101942	0.0857143	0.0432692	0.111111	0.00505051	0.0555556	0.0274725	0	0.0327103	0.0523256	0.0728155	0.107843	0.0572917	0.0490196	0.123298	0.0244957	0.0843254	0.0238569	0.0685072	0.0710863
rs2070676	0.708333	0.581967	0.681818	0.676991	0.762626	0.735294	0.657407	0.132979	0.15625	0.123529	0.288462	0.290323	0.194175	0.17619	0.201923	0.171717	0.141414	0.0858586	0.0989011	0.140187	0.168224	0.174419	0.145631	0.176471	0.166667	0.176471	0.69062	0.181556	0.205357	0.128231	0.167689	0.307308
rs2070959	0.286458	0.286885	0.232323	0.207965	0.217172	0.194118	0.263889	0.271277	0.242188	0.0764706	0.288462	0.16129	0.271845	0.209524	0.211538	0.121212	0.323232	0.383838	0.28022	0.266355	0.299065	0.377907	0.451456	0.421569	0.390625	0.441176	0.239032	0.223343	0.196429	0.310139	0.4182	0.277556
rs2072671	0.078125	0.131148	0.0454545	0.0530973	0.0808081	0.0823529	0.0324074	0.271277	0.320312	0.364706	0.278846	0.0860215	0.116505	0.0952381	0.206731	0.10101	0.343434	0.186869	0.32967	0.336449	0.369159	0.174419	0.247573	0.240196	0.270833	0.210784	0.0673222	0.305476	0.122024	0.314115	0.230061	0.192692
rs2108622	0.114583	0.0901639	0.0454545	0.0663717	0.111111	0.105882	0.0555556	0.281915	0.25	0.117647	0.288462	0.198925	0.218447	0.2	0.230769	0.222222	0.247475	0.217172	0.285714	0.35514	0.336449	0.412791	0.436893	0.401961	0.390625	0.421569	0.0824508	0.237752	0.214286	0.290258	0.413088	0.236821
rs2230037	0.260417	0.229508	0.232323	0.353982	0.29798	0.388235	0.24537	0.138298	0.179688	0.229412	0.125	0.209677	0.0679612	0.109524	0.0432692	0.227273	0.111111	0.0757576	0.104396	0.0934579	0.121495	0.540698	0.330097	0.338235	0.385417	0.328431	0.288956	0.164265	0.128968	0.101392	0.379346	0.219449
rs2235013	0.505208	0.590164	0.489899	0.59292	0.5	0.447059	0.490741	0.531915	0.507812	0.652941	0.495192	0.354839	0.31068	0.37619	0.399038	0.434343	0.449495	0.414141	0.527473	0.560748	0.509346	0.366279	0.42233	0.392157	0.463542	0.372549	0.515129	0.54611	0.375	0.493042	0.403885	0.465056
rs2235033	0.505208	0.590164	0.489899	0.59292	0.5	0.447059	0.490741	0.531915	0.507812	0.652941	0.495192	0.354839	0.31068	0.37619	0.399038	0.434343	0.449495	0.414141	0.527473	0.560748	0.509346	0.366279	0.42233	0.392157	0.463542	0.372549	0.515129	0.54611	0.375	0.493042	0.403885	0.465056
rs2242480	0.791667	0.745902	0.909091	0.823009	0.909091	0.894118	0.847222	0.287234	0.390625	0.576471	0.341346	0.263441	0.247573	0.238095	0.274038	0.318182	0.0555556	0.0757576	0.0714286	0.116822	0.0841121	0.372093	0.334951	0.372549	0.411458	0.367647	0.850227	0.393372	0.267857	0.0815109	0.371166	0.421725
rs2256871	0.0625	0.0819672	0.111111	0.0353982	0.146465	0.0411765	0.0925926	0	0	0	0.00480769	0	0	0	0	0	0.00505051	0	0	0	0	0	0	0	0	0	0.0816944	0.00144092	0	0.000994036	0	0.0219649
rs2257401	0.572917	0.483607	0.636364	0.619469	0.661616	0.682353	0.615741	0.164894	0.21875	0.129412	0.254808	0.311828	0.315534	0.266667	0.254808	0.292929	0.0454545	0.0656566	0.0659341	0.0981308	0.0841121	0.383721	0.262136	0.357843	0.395833	0.362745	0.61649	0.193084	0.287698	0.0725646	0.350716	0.330471
rs2270450	0.239583	0.270492	0.333333	0.159292	0.212121	0.247059	0.208333	0.388298	0.398438	0.482353	0.3125	0.263441	0.169903	0.22381	0.206731	0.242424	0.247475	0.29798	0.252747	0.266355	0.313084	0.465116	0.524272	0.539216	0.510417	0.563725	0.234493	0.39049	0.220238	0.276342	0.522495	0.317891
rs2273697	0.208333	0.122951	0.191919	0.168142	0.191919	0.176471	0.236111	0.154255	0.148438	0.141176	0.182692	0.0430108	0.135922	0.109524	0.125	0.0606061	0.237374	0.156566	0.236264	0.21028	0.182243	0.226744	0.305825	0.294118	0.307292	0.25	0.189107	0.158501	0.0962302	0.203777	0.278119	0.186502
rs2279341	0.046875	0.0491803	0.010101	0.0530973	0.0909091	0.0647059	0.0462963	0.0744681	0.0234375	0.0176471	0.0673077	0.0645161	0.0339806	0.0333333	0.0288462	0.0858586	0.040404	0.0606061	0.0659341	0.0607477	0.0747664	0.0465116	0.0339806	0.0539216	0.0416667	0.0686275	0.0514372	0.0489914	0.0486111	0.0606362	0.0490798	0.0519169
rs2279342	0.0729167	0.0737705	0.0151515	0.039823	0.0454545	0.0588235	0.0185185	0.143617	0.203125	0.276471	0.0865385	0.134409	0.247573	0.219048	0.177885	0.136364	0.0808081	0.19697	0.0824176	0.107477	0.121495	0.151163	0.169903	0.156863	0.171875	0.171569	0.0438729	0.170029	0.184524	0.11829	0.164622	0.128195
rs2279344	0.864583	0.860656	0.838384	0.831858	0.919192	0.876471	0.902778	0.808511	0.796875	0.905882	0.740385	0.763441	0.68932	0.666667	0.649038	0.712121	0.611111	0.580808	0.598901	0.654206	0.672897	0.784884	0.820388	0.759804	0.765625	0.813725	0.870651	0.809798	0.694444	0.625249	0.789366	0.761581
rs2285161	0.078125	0.188525	0.0555556	0.0353982	0.0757576	0.129412	0.0462963	0.255319	0.421875	0.658824	0.206731	0.376344	0.5	0.485714	0.4375	0.459596	0.19697	0.232323	0.197802	0.135514	0.233645	0.232558	0.18932	0.264706	0.229167	0.220588	0.0786687	0.370317	0.453373	0.198807	0.226994	0.247604
rs2285162	0.921875	0.918033	0.964646	0.982301	0.944444	0.964706	0.939815	0.792553	0.742188	0.847059	0.769231	0.451613	0.582524	0.585714	0.5625	0.535354	0.656566	0.722222	0.741758	0.714953	0.771028	0.540698	0.553398	0.578431	0.645833	0.627451	0.950076	0.789625	0.545635	0.72167	0.58998	0.730232
rs2285164	0.921875	0.909836	0.964646	0.982301	0.949495	0.964706	0.939815	0.792553	0.734375	0.847059	0.759615	0.451613	0.582524	0.580952	0.5625	0.525253	0.646465	0.717172	0.741758	0.71028	0.771028	0.546512	0.548544	0.573529	0.645833	0.627451	0.950076	0.785303	0.542659	0.717694	0.588957	0.728035
rs2285167	0.0416667	0.0409836	0.00505051	0.0132743	0.0454545	0.00588235	0.0231481	0.106383	0.078125	0	0.129808	0.198925	0.179612	0.152381	0.158654	0.166667	0.20202	0.151515	0.164835	0.205607	0.158879	0.244186	0.18932	0.210784	0.182292	0.186275	0.0242057	0.0821326	0.170635	0.176938	0.201431	0.126997
rs2291075	0.578125	0.557377	0.60101	0.513274	0.545455	0.523529	0.597222	0.430851	0.195312	0.223529	0.413462	0.61828	0.519417	0.514286	0.375	0.540404	0.39899	0.439394	0.351648	0.364486	0.425234	0.267442	0.135922	0.264706	0.171875	0.176471	0.559758	0.331412	0.510913	0.39662	0.201431	0.415535
rs2297809	0.171875	0.147541	0.116162	0.10177	0.106061	0.1	0.143519	0.170213	0.148438	0.252941	0.168269	0.134409	0.330097	0.3	0.326923	0.161616	0.136364	0.156566	0.164835	0.102804	0.0981308	0.139535	0.0679612	0.142157	0.09375	0.127451	0.125567	0.185879	0.253968	0.130219	0.113497	0.158347
rs2297810	0.46875	0.47541	0.489899	0.353982	0.580808	0.441176	0.439815	0.212766	0.195312	0.276471	0.240385	0.182796	0.334951	0.333333	0.350962	0.186869	0.136364	0.156566	0.164835	0.107477	0.0981308	0.186047	0.11165	0.205882	0.119792	0.240196	0.461422	0.233429	0.280754	0.131213	0.172802	0.270767
rs2298771	0.171875	0.155738	0.121212	0.207965	0.171717	0.0882353	0.148148	0.239362	0.226562	0.152941	0.317308	0.112903	0.131068	0.104762	0.129808	0.0707071	0.338384	0.232323	0.252747	0.345794	0.359813	0.232558	0.262136	0.308824	0.276042	0.284314	0.154312	0.239193	0.110119	0.308151	0.274029	0.211462
rs2302538	0.40625	0.327869	0.429293	0.455752	0.469697	0.441176	0.407407	0.106383	0.117188	0.0294118	0.129808	0.0591398	0.0242718	0.0571429	0.0480769	0.0707071	0.10101	0.0959596	0.126374	0.130841	0.182243	0.174419	0.135922	0.166667	0.140625	0.171569	0.425113	0.0965418	0.0515873	0.128231	0.157464	0.192492
rs2306282	0	0	0	0	0	0	0	0	0	0	0	0	0	0.0047619	0.0144231	0	0	0	0	0	0	0	0	0	0	0	0	0	0.00396825	0	0	0.000798722
rs2306283	0.786458	0.745902	0.883838	0.814159	0.843434	0.805882	0.814815	0.478723	0.375	0.470588	0.528846	0.806452	0.776699	0.795238	0.658654	0.777778	0.40404	0.439394	0.357143	0.415888	0.392523	0.563953	0.553398	0.598039	0.458333	0.558824	0.8177	0.472622	0.761905	0.402584	0.547035	0.622404
rs2359612	0.84375	0.778689	0.823232	0.831858	0.818182	0.811765	0.824074	0.56383	0.53125	0.611765	0.581731	0.177419	0.0436893	0.109524	0.0961538	0.156566	0.570707	0.691919	0.642857	0.640187	0.523364	0.843023	0.825243	0.906863	0.802083	0.892157	0.821483	0.574928	0.115079	0.612326	0.854806	0.609625
rs239345	0.333333	0.295082	0.419192	0.420354	0.368687	0.311765	0.439815	0.218085	0.1875	0.105882	0.230769	0.16129	0.237864	0.252381	0.163462	0.176768	0.313131	0.282828	0.247253	0.285047	0.238318	0.209302	0.213592	0.230392	0.229167	0.22549	0.377458	0.188761	0.199405	0.27336	0.221881	0.264177
rs2405599	0.21875	0.172131	0.252525	0.190265	0.237374	0.229412	0.25	0.281915	0.273438	0.358824	0.25	0.586022	0.601942	0.619048	0.620192	0.641414	0.257576	0.20202	0.208791	0.205607	0.242991	0.581395	0.524272	0.490196	0.59375	0.583333	0.223903	0.289625	0.614087	0.223658	0.55317	0.375799
rs2459693	0.901042	0.811475	0.924242	0.89823	0.934343	0.894118	0.912037	0.606383	0.570312	0.388235	0.620192	0.236559	0.228155	0.266667	0.206731	0.29798	0.580808	0.414141	0.593407	0.570093	0.626168	0.494186	0.606796	0.578431	0.536458	0.519608	0.901664	0.550432	0.247024	0.557654	0.54908	0.583267
rs2470890	0.911458	0.877049	1	0.982301	0.994949	1	1	0.606383	0.734375	0.882353	0.524038	0.844086	0.88835	0.828571	0.788462	0.833333	0.338384	0.434343	0.340659	0.406542	0.485981	0.80814	0.859223	0.872549	0.770833	0.892157	0.972012	0.672911	0.83631	0.403579	0.842536	0.763778
rs2472304	0.0885417	0.131148	0.00505051	0.0176991	0.0151515	0.00588235	0.00925926	0.393617	0.265625	0.117647	0.475962	0.155914	0.11165	0.171429	0.211538	0.166667	0.661616	0.565657	0.664835	0.598131	0.518692	0.186047	0.140777	0.127451	0.229167	0.107843	0.0332829	0.327089	0.16369	0.599404	0.156442	0.238019
rs2518463	0.71875	0.737705	0.681818	0.641593	0.767677	0.794118	0.75	0.553191	0.4375	0.611765	0.596154	0.376344	0.354369	0.371429	0.447115	0.40404	0.585859	0.540404	0.56044	0.504673	0.504673	0.424419	0.373786	0.465686	0.427083	0.411765	0.723903	0.559078	0.390873	0.537773	0.420245	0.53734
rs2677760	0.796875	0.713115	0.792929	0.809735	0.79798	0.817647	0.74537	0.56383	0.539062	0.370588	0.572115	0.22043	0.18932	0.204762	0.177885	0.247475	0.520202	0.383838	0.527473	0.546729	0.565421	0.406977	0.519417	0.52451	0.473958	0.411765	0.785174	0.514409	0.207341	0.50994	0.469325	0.514377
rs2687116	0.661458	0.672131	0.681818	0.761062	0.777778	0.741176	0.726852	0.0904255	0.0703125	0.0352941	0.1875	0	0	0	0	0.0252525	0.020202	0.0353535	0.032967	0.0280374	0.0327103	0.0174419	0.0776699	0.0539216	0.0416667	0.0294118	0.720877	0.102305	0.00496032	0.0298211	0.0449898	0.220248
rs2699905	0.109375	0.0655738	0.0808081	0.0265487	0.0707071	0.0411765	0.0833333	0.18617	0.1875	0.0941176	0.144231	0.0215054	0.0679612	0.0714286	0.0625	0.0606061	0.287879	0.237374	0.252747	0.172897	0.200935	0.156977	0.194175	0.161765	0.145833	0.137255	0.0680787	0.151297	0.0575397	0.228628	0.159509	0.127596
rs2738467	0.0625	0.155738	0	0.00884956	0.020202	0	0	0.473404	0.414062	0.505882	0.466346	0.252688	0.179612	0.161905	0.173077	0.257576	0.429293	0.479798	0.456044	0.429907	0.443925	0.331395	0.349515	0.367647	0.385417	0.362745	0.0279879	0.4683	0.203373	0.447316	0.359918	0.273363
rs2740574	0.661458	0.672131	0.767677	0.792035	0.833333	0.835294	0.763889	0.101064	0.0703125	0.0352941	0.1875	0	0	0	0	0.020202	0.0151515	0.0353535	0.032967	0.0280374	0.0280374	0.0174419	0.0776699	0.0441176	0.0260417	0.0294118	0.765507	0.105187	0.00396825	0.027833	0.0398773	0.230831
rs2741047	0.625	0.581967	0.565657	0.570796	0.737374	0.676471	0.564815	0.601064	0.484375	0.411765	0.509615	0.5	0.427184	0.495238	0.360577	0.414141	0.616162	0.671717	0.587912	0.542056	0.607477	0.662791	0.718447	0.686275	0.65625	0.720588	0.61649	0.505764	0.438492	0.604374	0.690184	0.577276
rs2741048	0.625	0.581967	0.565657	0.570796	0.742424	0.676471	0.564815	0.601064	0.484375	0.411765	0.509615	0.5	0.427184	0.495238	0.360577	0.414141	0.616162	0.671717	0.587912	0.542056	0.607477	0.662791	0.718447	0.686275	0.65625	0.720588	0.617247	0.505764	0.438492	0.604374	0.690184	0.577476
rs2804402	0.28125	0.319672	0.267677	0.367257	0.318182	0.4	0.282407	0.420213	0.476562	0.252941	0.466346	0.231183	0.262136	0.257143	0.221154	0.267677	0.414141	0.393939	0.423077	0.462617	0.495327	0.430233	0.359223	0.362745	0.302083	0.367647	0.318457	0.403458	0.248016	0.439364	0.362986	0.349042
rs28365083	0	0	0	0	0	0	0	0	0	0	0	0	0	0	0	0	0.010101	0.00505051	0	0.0046729	0	0	0	0	0	0	0	0	0	0.00397614	0	0.000798722
rs28365085	0	0	0	0	0	0	0	0	0	0	0	0	0.0145631	0	0.0240385	0	0	0	0	0	0	0	0	0	0	0	0	0	0.00793651	0	0	0.00159744
rs28371685	0.015625	0.00819672	0.010101	0.0353982	0.0151515	0.0235294	0.0509259	0	0	0	0.00480769	0	0	0	0	0	0	0.010101	0	0	0	0	0	0.00490196	0	0	0.0242057	0.00144092	0	0.00198807	0.00102249	0.0071885
rs28371686	0.015625	0.0245902	0.0252525	0.00884956	0.010101	0.00588235	0.0277778	0	0	0	0.00480769	0	0	0	0	0	0	0	0	0	0	0	0	0	0	0	0.0166415	0.00144092	0	0	0	0.00459265
rs28371696	0.0260417	0.0245902	0.020202	0.039823	0.040404	0	0.00925926	0.0212766	0	0	0.00480769	0	0	0	0	0	0	0.00505051	0	0.0046729	0	0.0232558	0	0.00980392	0.00520833	0.0196078	0.0234493	0.00720461	0	0.00198807	0.0112474	0.00978435
rs28371703	0.046875	0.0655738	0.00505051	0.0221239	0.0151515	0	0.00462963	0.117021	0.101562	0.0294118	0.125	0	0	0	0	0.00505051	0.191919	0.136364	0.230769	0.140187	0.172897	0.0988372	0.11165	0.0588235	0.0677083	0.0686275	0.0204236	0.0951009	0.000992063	0.172962	0.0807771	0.0692891
rs28371704	0.046875	0.0655738	0.00505051	0.0221239	0.0151515	0	0.00462963	0.117021	0.101562	0.0294118	0.125	0	0	0	0	0.00505051	0.191919	0.136364	0.230769	0.140187	0.172897	0.0988372	0.11165	0.0588235	0.0677083	0.0686275	0.0204236	0.0951009	0.000992063	0.172962	0.0807771	0.0692891
rs28371706	0.208333	0.147541	0.262626	0.163717	0.191919	0.282353	0.25463	0.0106383	0	0.0117647	0.00961538	0	0	0	0	0	0	0	0	0.00934579	0	0	0	0	0	0	0.217852	0.00864553	0	0.00198807	0	0.0591054
rs28371710	0.03125	0.0409836	0.0555556	0.0486726	0.0707071	0.0352941	0.037037	0	0.0078125	0.00588235	0.00480769	0	0	0	0	0	0	0	0	0	0	0	0	0	0	0	0.0461422	0.00432277	0	0	0	0.0127796
rs28371717	0	0	0	0	0	0	0	0	0	0	0.00961538	0	0.00485437	0	0	0	0.00505051	0.00505051	0	0.0046729	0.0140187	0	0	0	0.0104167	0	0	0.00288184	0.000992063	0.00596421	0.00204499	0.00219649
rs28371725	0.046875	0.0163934	0.0151515	0.00442478	0.030303	0.00588235	0.00925926	0.0797872	0.015625	0.00588235	0.120192	0.0806452	0.0339806	0.047619	0.00480769	0.0252525	0.121212	0.0353535	0.0714286	0.088785	0.14486	0.0930233	0.145631	0.137255	0.109375	0.117647	0.0181543	0.0619597	0.0376984	0.0934394	0.121677	0.0634984
rs28371759	0	0	0	0	0	0	0	0	0	0	0	0	0	0.0142857	0.0144231	0.0252525	0	0	0	0	0	0	0	0	0	0	0	0	0.0109127	0	0	0.00219649
rs28383468	0	0	0	0	0	0	0	0	0	0	0.00480769	0	0	0	0	0	0	0.00505051	0.0164835	0.0233645	0.0140187	0.00581395	0.00485437	0.00490196	0.00520833	0	0	0.00144092	0	0.0119284	0.00408998	0.00339457
rs28399424	0	0	0	0	0	0	0	0	0.0078125	0	0	0	0	0	0	0	0	0.010101	0.00549451	0	0	0	0	0	0	0	0	0.00144092	0	0.00298211	0	0.000798722
rs28399430	0	0	0	0	0	0	0	0	0	0	0	0	0.0145631	0	0	0	0	0	0	0	0	0	0	0	0	0	0	0	0.00297619	0	0	0.000599042
rs28399433	0.0625	0.106557	0.0959596	0.0575221	0.0909091	0.0705882	0.101852	0.101064	0.101562	0.0941176	0.100962	0.177419	0.26699	0.261905	0.278846	0.20202	0.0505051	0.141414	0.043956	0.0560748	0.0654206	0.151163	0.18932	0.132353	0.197917	0.102941	0.0824508	0.0994236	0.239087	0.0715706	0.154397	0.128195
rs28399434	0	0	0	0	0	0	0	0	0	0	0	0	0	0	0.00961538	0	0	0	0	0	0	0	0	0	0	0	0	0	0.00198413	0	0	0.000399361
rs28399435	0.015625	0	0	0	0	0	0	0.037234	0	0	0.0240385	0	0	0	0	0	0.0353535	0.0252525	0.0659341	0.0140187	0.0280374	0.00581395	0.0194175	0.0588235	0.0104167	0.0147059	0.00226929	0.0172911	0	0.0328032	0.0224949	0.0139776
rs28399454	0.151042	0.0737705	0.126263	0.146018	0.0555556	0.111765	0.134259	0.0106383	0	0	0.00961538	0	0	0.0047619	0	0	0	0	0	0	0	0	0	0	0	0	0.117247	0.00576369	0.000992063	0	0	0.0319489
rs28399463	0.0104167	0.00819672	0.0252525	0.0221239	0.040404	0.0411765	0.0324074	0	0.0078125	0	0.00480769	0	0	0	0	0	0	0	0	0	0	0	0	0	0	0.00490196	0.026475	0.00288184	0	0	0.00102249	0.00758786
rs28399499	0.0572917	0.0983607	0.0656566	0.0973451	0.0606061	0.0823529	0.115741	0.0106383	0.0078125	0	0.0192308	0	0	0	0	0	0	0	0	0	0	0	0	0	0	0	0.0824508	0.0100865	0	0	0	0.0231629
rs28399504	0	0	0	0	0	0	0	0	0.0078125	0	0.00480769	0	0.00485437	0	0	0	0	0	0	0.0046729	0	0	0	0	0	0	0	0.00288184	0.000992063	0.000994036	0	0.000798722
rs28399513	0.151042	0.139344	0.207071	0.132743	0.212121	0.176471	0.166667	0.106383	0.125	0.0588235	0.125	0.263441	0.334951	0.352381	0.322115	0.282828	0.131313	0.217172	0.142857	0.14486	0.0934579	0.325581	0.330097	0.372549	0.34375	0.411765	0.170197	0.103746	0.3125	0.145129	0.357873	0.221246
rs2842934	0.197917	0.114754	0.176768	0.225664	0.191919	0.129412	0.24537	0.207447	0.210938	0.170588	0.288462	0.215054	0.228155	0.22381	0.283654	0.237374	0.191919	0.207071	0.214286	0.233645	0.266355	0.354651	0.339806	0.392157	0.375	0.406863	0.189864	0.223343	0.238095	0.223658	0.374233	0.247005
rs2854744	0.401042	0.442623	0.424242	0.367257	0.535354	0.423529	0.407407	0.590426	0.710938	0.8	0.600962	0.252688	0.228155	0.22381	0.283654	0.19697	0.606061	0.590909	0.527473	0.570093	0.425234	0.494186	0.587379	0.509804	0.578125	0.519608	0.426626	0.667147	0.237103	0.542744	0.538855	0.467053
rs2854746	0.645833	0.680328	0.631313	0.707965	0.742424	0.694118	0.625	0.638298	0.765625	0.847059	0.682692	0.252688	0.228155	0.228571	0.283654	0.212121	0.656566	0.636364	0.60989	0.61215	0.485981	0.587209	0.694175	0.671569	0.666667	0.632353	0.674735	0.726225	0.241071	0.59841	0.652352	0.57488
rs2884737	0.0104167	0.0655738	0	0.00442478	0.00505051	0	0	0.18617	0.140625	0.0352941	0.302885	0	0.00485437	0	0	0	0.267677	0.186869	0.214286	0.271028	0.327103	0.0581395	0.0679612	0.0539216	0.125	0.0343137	0.00907716	0.175793	0.000992063	0.255467	0.0674847	0.0914537
rs28898617	0	0	0	0	0	0	0	0	0	0	0	0.0268817	0.0582524	0.0714286	0.0480769	0.0353535	0	0	0	0	0	0	0	0	0	0	0	0	0.0486111	0	0	0.00978435
rs28898619	0.03125	0.00819672	0.0252525	0.0265487	0.030303	0.0294118	0.0324074	0.00531915	0	0	0	0	0	0	0	0	0	0	0	0	0	0	0	0	0	0	0.0272315	0.00144092	0	0	0	0.00738818
rs28969685	0.0416667	0.0245902	0.040404	0.0309735	0.020202	0.0941176	0.0462963	0.00531915	0	0	0	0	0	0	0	0	0	0	0	0	0	0	0	0	0	0	0.0423601	0.00144092	0	0	0	0.0113818
rs2960436	0.385417	0.409836	0.388889	0.318584	0.5	0.376471	0.37037	0.590426	0.703125	0.8	0.605769	0.252688	0.223301	0.22381	0.283654	0.19697	0.606061	0.585859	0.527473	0.574766	0.425234	0.5	0.587379	0.509804	0.604167	0.52451	0.390318	0.667147	0.236111	0.542744	0.546012	0.458666
rs3110697	0.359375	0.385246	0.373737	0.30531	0.474747	0.341176	0.342593	0.537234	0.640625	0.805882	0.528846	0.258065	0.252427	0.252381	0.283654	0.19697	0.474747	0.449495	0.39011	0.476636	0.35514	0.482558	0.524272	0.455882	0.526042	0.504902	0.366868	0.619597	0.249008	0.429423	0.498978	0.416534
rs3211369	0	0	0	0	0	0	0	0	0	0	0	0	0	0	0.00961538	0	0	0	0	0	0	0	0.00485437	0	0	0	0	0	0.00198413	0	0.00102249	0.000599042
rs3211371	0.0104167	0.0327869	0	0.0132743	0	0.0235294	0.00925926	0.0744681	0.0859375	0.0294118	0.0961538	0	0	0	0.00961538	0.00505051	0.0959596	0.146465	0.115385	0.0981308	0.107477	0.0697674	0.0970874	0.0980392	0.09375	0.0833333	0.0113464	0.0720461	0.00297619	0.112326	0.0889571	0.0535144
rs3215400	0.604167	0.663934	0.636364	0.646018	0.691919	0.611765	0.671296	0.430851	0.46875	0.452941	0.524038	0.365591	0.490291	0.419048	0.442308	0.444444	0.535354	0.545455	0.576923	0.551402	0.556075	0.505814	0.475728	0.627451	0.5625	0.544118	0.646747	0.471182	0.433532	0.552684	0.543967	0.540535
rs3215983	0.046875	0.106557	0.0505051	0	0.040404	0.0117647	0.0416667	0.164894	0.148438	0.247059	0.163462	0.134409	0.330097	0.304762	0.326923	0.161616	0.136364	0.156566	0.164835	0.102804	0.0981308	0.139535	0.0679612	0.147059	0.09375	0.132353	0.0385779	0.181556	0.25496	0.130219	0.115542	0.135383
rs33926104	0.0104167	0.00819672	0.010101	0.0132743	0.00505051	0.00588235	0.0324074	0	0	0.00588235	0.00480769	0	0	0	0	0	0	0	0	0	0	0	0	0	0	0	0.0128593	0.00288184	0	0	0	0.00379393
rs33980385	0.0104167	0.00819672	0.010101	0.0132743	0.00505051	0.00588235	0.0324074	0	0	0.00588235	0.00480769	0	0	0	0	0	0	0	0	0	0	0	0	0	0	0	0.0128593	0.00288184	0	0	0	0.00379393
rs34130495	0.0104167	0.0163934	0	0	0	0	0	0.00531915	0.0078125	0.00588235	0.00961538	0	0	0	0	0	0.0151515	0.0151515	0.021978	0.0327103	0.0186916	0.00581395	0	0	0	0	0.00302572	0.00720461	0	0.0208748	0.00102249	0.0061901
rs34223104	0.03125	0.0409836	0.030303	0.0486726	0.040404	0.0529412	0.0138889	0	0.0078125	0.00588235	0.0144231	0	0.00970874	0	0	0	0.010101	0	0	0.00934579	0.0233645	0.0116279	0.0242718	0.00980392	0.03125	0.0147059	0.0363086	0.00720461	0.00198413	0.00894632	0.0184049	0.0163738
rs34284776	0.0104167	0.00819672	0.010101	0.0132743	0.00505051	0.00588235	0.0324074	0	0	0.00588235	0.00480769	0	0	0	0	0	0	0	0	0	0	0	0	0	0	0	0.0128593	0.00288184	0	0	0	0.00379393
rs34531096	0	0	0	0	0	0	0	0	0	0	0	0.016129	0.0436893	0.0047619	0.00961538	0.0151515	0	0	0	0	0	0	0	0	0	0	0	0	0.0178571	0	0	0.00359425
rs34671512	0.09375	0.0327869	0.0808081	0.0486726	0.0707071	0.0529412	0.0648148	0.0425532	0.0078125	0.0294118	0.0817308	0.016129	0	0	0	0.010101	0.040404	0.040404	0.043956	0.0607477	0.0700935	0.0465116	0.0679612	0.0588235	0.0364583	0.0343137	0.065053	0.0446686	0.00496032	0.0516899	0.0490798	0.0443291
rs34698757	0	0	0	0	0	0.00588235	0	0	0	0	0	0	0	0	0	0	0	0	0	0	0	0	0	0	0	0	0.00075643	0	0	0	0	0.000199681
rs34826503	0	0	0	0.00442478	0	0.0176471	0	0	0	0	0	0	0.00485437	0	0	0	0	0	0	0	0	0	0	0	0	0	0.00302572	0	0.000992063	0	0	0.000998403
rs34883432	0	0	0	0	0	0	0	0.0319149	0	0	0.0144231	0	0	0	0	0.00505051	0	0	0.00549451	0.0046729	0.0233645	0	0	0	0.00520833	0	0	0.0129683	0.000992063	0.00695825	0.00102249	0.00359425
rs34946978	0	0	0	0	0	0	0	0	0	0	0	0.00537634	0.0242718	0.0238095	0	0	0	0	0	0	0	0	0	0	0	0	0	0	0.0109127	0	0	0.00219649
rs34971233	0.046875	0.0163934	0.0252525	0.00884956	0.0555556	0	0.0185185	0.0106383	0.046875	0.00588235	0.0288462	0	0	0	0	0	0.0353535	0.0252525	0.0164835	0.0186916	0.0233645	0.0290698	0.0242718	0.00980392	0.015625	0.0147059	0.0249622	0.0216138	0	0.0238569	0.0184049	0.0179712
rs34993780	0	0	0	0	0	0	0	0	0	0	0	0.0107527	0	0.0047619	0	0	0	0	0	0	0	0.00581395	0	0	0	0	0	0	0.00297619	0	0.00102249	0.000798722
rs35266616	0	0	0	0	0	0.00588235	0	0	0	0	0	0	0	0	0	0	0	0	0	0	0	0	0	0	0	0	0.00075643	0	0	0	0	0.000199681
rs35303484	0	0	0	0	0.00505051	0	0	0	0	0	0	0	0	0	0	0	0.00505051	0	0.00549451	0.00934579	0	0.00581395	0	0	0	0	0.00075643	0	0	0.00397614	0.00102249	0.00119808
rs35350960	0	0	0	0	0	0	0	0	0	0	0	0.0322581	0.00485437	0.00952381	0.00480769	0.020202	0	0	0	0	0	0	0	0	0	0	0	0	0.0138889	0	0	0.00279553
rs35468935	0.0416667	0.0245902	0.0151515	0.00884956	0	0	0.0416667	0	0	0	0.00480769	0	0.00485437	0	0.00480769	0	0.010101	0	0	0	0	0	0	0	0	0	0.0189107	0.00144092	0.00198413	0.00198807	0	0.00599042
rs35599367	0.00520833	0	0	0	0	0	0	0.0265957	0.0078125	0.0117647	0.0480769	0	0	0	0	0	0.0454545	0.0454545	0.0879121	0.0373832	0.0373832	0	0.00485437	0.00490196	0.0104167	0.00980392	0.00075643	0.0259366	0	0.0497018	0.00613497	0.014976
rs35622401	0	0	0	0	0	0.00588235	0	0	0	0	0	0	0	0	0	0	0	0	0	0	0	0	0	0	0	0	0.00075643	0	0	0	0	0.000199681
rs35694136	0.510417	0.5	0.489899	0.553097	0.429293	0.523529	0.518519	0.335106	0.460938	0.747059	0.225962	0.602151	0.524272	0.471429	0.394231	0.570707	0.0656566	0.126263	0.0659341	0.0420561	0.102804	0.389535	0.383495	0.416667	0.3125	0.387255	0.504539	0.426513	0.509921	0.0805169	0.378323	0.384984
rs35773040	0	0	0	0	0	0	0	0.00531915	0	0	0.00961538	0	0	0	0	0	0	0.010101	0	0	0	0	0	0	0	0	0	0.00432277	0	0.00198807	0	0.000998403
rs35796837	0	0	0	0	0	0	0	0	0	0.00588235	0	0.0107527	0.00485437	0	0	0.00505051	0	0	0	0	0	0.0116279	0.00970874	0.00490196	0	0	0	0.00144092	0.00396825	0	0.00511247	0.00199681
rs35979566	0.00520833	0	0	0	0	0	0	0	0	0	0.0144231	0	0	0	0	0	0.0151515	0	0.00549451	0.0046729	0	0	0	0	0	0	0.00075643	0.00432277	0	0.00497018	0	0.00179712
rs36056539	0	0	0	0	0	0	0	0.00531915	0	0	0	0	0	0	0	0	0	0	0	0	0	0	0	0	0	0	0	0.00144092	0	0	0	0.000199681
rs36060847	0	0	0	0	0	0	0	0	0	0	0.00480769	0	0	0	0	0	0	0	0	0	0	0	0	0	0	0	0	0.00144092	0	0	0	0.000199681
rs36079186	0	0	0	0	0.0151515	0	0	0	0	0	0	0	0	0	0	0	0	0	0	0	0	0	0	0	0.00520833	0	0.00226929	0	0	0	0.00102249	0.000798722
rs367543001	0	0	0	0	0	0	0	0	0	0	0	0	0	0	0	0	0	0	0	0	0	0.0232558	0.0145631	0.0147059	0	0.0147059	0	0	0	0	0.0132924	0.00259585
rs367543002	0	0	0	0	0	0	0	0	0	0	0	0	0	0	0	0	0	0	0	0	0	0.0232558	0.0145631	0.0147059	0	0.0147059	0	0	0	0	0.0132924	0.00259585
rs367543003	0	0	0	0	0	0	0	0	0	0	0	0	0	0	0	0	0	0	0	0	0	0.0232558	0.0145631	0.0147059	0	0.0147059	0	0	0	0	0.0132924	0.00259585
rs3732217	0.0885417	0.0819672	0.10101	0.0486726	0.0808081	0.0294118	0.0833333	0.0691489	0.109375	0.141176	0.0576923	0.306452	0.160194	0.247619	0.129808	0.287879	0.0707071	0.0252525	0.0494505	0.0607477	0.121495	0.203488	0.160194	0.205882	0.1875	0.196078	0.0733737	0.0907781	0.224206	0.0666004	0.190184	0.127596
rs3732218	0.09375	0.0901639	0.121212	0.0575221	0.0808081	0.0352941	0.0833333	0.0851064	0.117188	0.141176	0.0721154	0.317204	0.160194	0.266667	0.134615	0.29798	0.0909091	0.0707071	0.0714286	0.0841121	0.154206	0.226744	0.199029	0.235294	0.208333	0.220588	0.0801815	0.100865	0.233135	0.0954274	0.217791	0.14377
rs3732219	0.09375	0.0901639	0.121212	0.0575221	0.0808081	0.0352941	0.0833333	0.0851064	0.117188	0.141176	0.0721154	0.317204	0.160194	0.266667	0.134615	0.29798	0.0909091	0.0656566	0.0714286	0.0841121	0.154206	0.226744	0.199029	0.235294	0.208333	0.220588	0.0801815	0.100865	0.233135	0.0944334	0.217791	0.14357
rs3735273	0.453125	0.360656	0.434343	0.438053	0.237374	0.323529	0.361111	0.164894	0.109375	0.0764706	0.211538	0.44086	0.38835	0.352381	0.360577	0.424242	0.232323	0.237374	0.258242	0.182243	0.233645	0.406977	0.203883	0.343137	0.354167	0.333333	0.375189	0.146974	0.391865	0.227634	0.325153	0.307508
rs3735451	0.760417	0.688525	0.883838	0.769912	0.878788	0.870588	0.810185	0.191489	0.242188	0.170588	0.298077	0.33871	0.339806	0.271429	0.288462	0.358586	0.0808081	0.10101	0.0824176	0.121495	0.107477	0.383721	0.334951	0.362745	0.421875	0.367647	0.813918	0.227666	0.318452	0.0994036	0.373211	0.403355
rs3735684	0.0572917	0.0655738	0.0808081	0.0575221	0.0909091	0.0588235	0.0833333	0.106383	0.0859375	0.241176	0.100962	0.0107527	0.0339806	0.0285714	0.0144231	0.030303	0.0454545	0.030303	0.0659341	0.0280374	0.0934579	0.0116279	0.0291262	0.0392157	0.0520833	0.0588235	0.0711044	0.134006	0.0238095	0.0526839	0.0388548	0.0603035
rs3740066	0.244792	0.278689	0.237374	0.176991	0.151515	0.247059	0.212963	0.356383	0.421875	0.241176	0.360577	0.225806	0.252427	0.257143	0.225962	0.272727	0.333333	0.368687	0.384615	0.392523	0.373832	0.331395	0.359223	0.294118	0.255208	0.284314	0.216339	0.341499	0.247024	0.370775	0.304703	0.288139
rs3745274	0.380208	0.352459	0.414141	0.349558	0.358586	0.352941	0.402778	0.367021	0.3125	0.458824	0.346154	0.327957	0.160194	0.157143	0.221154	0.222222	0.277778	0.156566	0.230769	0.205607	0.303738	0.366279	0.402913	0.357843	0.380208	0.397059	0.374433	0.373199	0.215278	0.235586	0.381391	0.315695
rs3757241	0.0416667	0.0491803	0.0151515	0.0176991	0.0353535	0.0294118	0.0277778	0.12766	0.164062	0.152941	0.115385	0.0537634	0.131068	0.0857143	0.110577	0.0656566	0.20202	0.257576	0.203297	0.28972	0.252336	0.0872093	0.145631	0.0980392	0.0989583	0.102941	0.0295008	0.136888	0.0902778	0.242545	0.107362	0.114617
rs3757472	0.473958	0.401639	0.39899	0.469027	0.454545	0.405882	0.375	0.228723	0.15625	0.158824	0.307692	0.478495	0.446602	0.414286	0.471154	0.515152	0.323232	0.227273	0.318681	0.303738	0.331776	0.44186	0.286408	0.421569	0.354167	0.401961	0.427383	0.221902	0.464286	0.301193	0.379346	0.371605
rs3758580	0.151042	0.139344	0.207071	0.132743	0.212121	0.176471	0.166667	0.106383	0.125	0.0588235	0.125	0.263441	0.334951	0.352381	0.322115	0.282828	0.131313	0.217172	0.142857	0.14486	0.0934579	0.325581	0.330097	0.372549	0.34375	0.411765	0.170197	0.103746	0.3125	0.145129	0.357873	0.221246
rs3758581	0.994792	0.983607	1	1	1	1	1	0.93617	0.976562	0.988235	0.966346	0.973118	0.956311	0.957143	0.951923	0.964646	0.934343	0.954545	0.934066	0.920561	0.915888	0.883721	0.868932	0.897059	0.895833	0.906863	0.997731	0.965418	0.960317	0.931412	0.890593	0.951478
rs3806596	0.859375	0.770492	0.914141	0.942478	0.893939	0.958824	0.912037	0.5	0.515625	0.605882	0.485577	0.456989	0.26699	0.37619	0.302885	0.393939	0.434343	0.419192	0.379121	0.397196	0.443925	0.622093	0.626214	0.637255	0.651042	0.671569	0.900151	0.524496	0.357143	0.415507	0.642127	0.591054
rs3806597	0.838542	0.737705	0.89899	0.933628	0.873737	0.923529	0.893519	0.494681	0.507812	0.6	0.475962	0.456989	0.26699	0.37619	0.302885	0.393939	0.434343	0.419192	0.379121	0.392523	0.443925	0.622093	0.626214	0.637255	0.651042	0.671569	0.879728	0.517291	0.357143	0.414513	0.642127	0.584465
rs3808348	0.0729167	0.139344	0.0656566	0.0663717	0.0959596	0.0470588	0.0648148	0.191489	0.375	0.329412	0.144231	0.327957	0.262136	0.266667	0.389423	0.257576	0.166667	0.30303	0.247253	0.17757	0.186916	0.127907	0.131068	0.112745	0.15625	0.112745	0.075643	0.244957	0.300595	0.214712	0.127812	0.182508
rs3812718	0.307292	0.344262	0.323232	0.362832	0.358586	0.364706	0.319444	0.558511	0.335938	0.441176	0.413462	0.677419	0.480583	0.619048	0.514423	0.70202	0.530303	0.570707	0.60989	0.471963	0.53271	0.598837	0.582524	0.553922	0.583333	0.588235	0.339637	0.445245	0.59623	0.540755	0.580777	0.493411
rs3813867	0.0572917	0.0737705	0.0808081	0.079646	0.0252525	0.0647059	0.0833333	0.12766	0.15625	0.164706	0.0625	0.16129	0.237864	0.2	0.192308	0.217172	0.0606061	0.040404	0.0274725	0.0233645	0.0514019	0.0116279	0.00970874	0.00980392	0.0104167	0.00490196	0.0665658	0.122478	0.202381	0.0407555	0.00920245	0.0852636
rs3813929	0.973958	0.967213	0.989899	1	0.959596	1	1	0.882979	0.867188	0.870588	0.894231	0.844086	0.854369	0.819048	0.903846	0.853535	0.823232	0.838384	0.835165	0.836449	0.859813	0.668605	0.805825	0.686275	0.729167	0.681373	0.985628	0.880403	0.855159	0.838966	0.715746	0.86262
rs3821242	0.6875	0.614754	0.727273	0.690265	0.717172	0.635294	0.763889	0.478723	0.507812	0.605882	0.461538	0.456989	0.26699	0.37619	0.302885	0.383838	0.434343	0.419192	0.373626	0.392523	0.448598	0.622093	0.626214	0.637255	0.651042	0.671569	0.697428	0.510086	0.355159	0.414513	0.642127	0.534944
rs3826711	0	0	0	0	0	0	0	0	0	0	0	0	0.00970874	0.0047619	0.00961538	0	0	0	0	0	0	0	0	0	0	0	0	0	0.00496032	0	0	0.000998403
rs3833221	0.395833	0.401639	0.439394	0.362832	0.469697	0.435294	0.467593	0.180851	0.140625	0.117647	0.278846	0.268817	0.257282	0.242857	0.1875	0.30303	0.19697	0.252525	0.142857	0.14486	0.163551	0.290698	0.169903	0.235294	0.3125	0.210784	0.425113	0.18732	0.250992	0.17992	0.241309	0.271965
rs3892097	0.0885417	0.122951	0.0757576	0.039823	0.0252525	0.0411765	0.0555556	0.164894	0.125	0.0647059	0.153846	0	0.00485437	0	0	0.00505051	0.227273	0.136364	0.241758	0.14486	0.186916	0.122093	0.126214	0.112745	0.078125	0.107843	0.0605144	0.129683	0.00198413	0.185885	0.109407	0.0930511
rs3892221	0.015625	0.0163934	0.0353535	0.0265487	0.0555556	0.111765	0.0416667	0	0	0	0	0	0.0242718	0	0.0288462	0	0	0.00505051	0	0.0046729	0	0	0	0	0	0	0.0431165	0	0.0109127	0.00198807	0	0.0139776
rs3918290	0	0.00819672	0	0	0	0	0	0	0	0.00588235	0	0	0	0	0	0	0.00505051	0.0151515	0	0	0.0046729	0	0.0145631	0	0.0104167	0.0147059	0.00075643	0.00144092	0	0.00497018	0.00817996	0.00299521
rs3931660	0.109375	0.163934	0.0757576	0.0929204	0.20202	0.129412	0.138889	0.037234	0.0546875	0.0882353	0.0913462	0.0376344	0.00485437	0.0285714	0.0192308	0.030303	0.030303	0.0252525	0.032967	0.0420561	0.0140187	0.0290698	0.0194175	0.0245098	0.0104167	0.00490196	0.127837	0.0691643	0.0238095	0.028827	0.0173824	0.0573083
rs4124874	0.854167	0.778689	0.914141	0.942478	0.893939	0.952941	0.907407	0.510638	0.515625	0.605882	0.485577	0.451613	0.271845	0.380952	0.3125	0.373737	0.434343	0.419192	0.379121	0.397196	0.443925	0.610465	0.606796	0.602941	0.651042	0.666667	0.898638	0.527378	0.356151	0.415507	0.627812	0.588059
rs41279188	0	0	0	0	0	0	0	0	0	0	0	0	0	0	0	0	0.020202	0	0.00549451	0	0	0	0	0	0	0	0	0	0	0.00497018	0	0.000998403
rs41279854	0	0	0	0	0	0	0	0	0	0	0	0	0	0	0	0	0.00505051	0	0	0	0	0	0	0	0	0	0	0	0	0.000994036	0	0.000199681
rs41291556	0	0.00819672	0	0	0	0	0	0	0	0	0	0	0	0	0	0	0.0151515	0	0	0	0	0	0	0.00490196	0	0	0.00075643	0	0	0.00298211	0.00102249	0.000998403
rs41303343	0.109375	0.122951	0.0858586	0.137168	0.116162	0.135294	0.12037	0	0	0.00588235	0.00480769	0	0	0	0	0	0	0	0	0	0	0	0	0	0	0	0.118003	0.00288184	0	0	0	0.0315495
rs4148269	0.177083	0.286885	0.136364	0.0840708	0.0606061	0.1	0.106481	0.5	0.546875	0.576471	0.418269	0.241935	0.131068	0.180952	0.139423	0.262626	0.656566	0.641414	0.648352	0.621495	0.616822	0.494186	0.548544	0.47549	0.5625	0.446078	0.126324	0.502882	0.189484	0.636183	0.505112	0.367612
rs4148323	0	0.00819672	0	0	0	0	0	0.0265957	0.0234375	0	0	0.102151	0.228155	0.157143	0.129808	0.0656566	0	0.0353535	0	0	0	0.0290698	0.0194175	0.0147059	0	0.0245098	0.00075643	0.0115274	0.137897	0.00695825	0.0173824	0.034345
rs4148327	0	0	0	0	0	0	0	0	0	0	0	0.0322581	0.0145631	0.0380952	0.0432692	0.0151515	0	0	0	0	0	0.00581395	0	0	0.00520833	0	0	0	0.0287698	0	0.00204499	0.0061901
rs4149015	0	0.00819672	0.00505051	0	0.030303	0.00588235	0	0.0691489	0.0234375	0.00588235	0.0432692	0.145161	0.121359	0.119048	0.115385	0.156566	0.040404	0.0959596	0.021978	0.0794393	0.0794393	0.0406977	0.0582524	0.0490196	0.0208333	0.0441176	0.00680787	0.037464	0.130952	0.0646123	0.0429448	0.0547125
rs4149056	0.0208333	0.0655738	0	0	0.020202	0	0.00925926	0.180851	0.078125	0.141176	0.120192	0.139785	0.135922	0.119048	0.120192	0.10101	0.146465	0.181818	0.142857	0.116822	0.214953	0.0523256	0.0194175	0.0637255	0.0364583	0.0441176	0.0136157	0.134006	0.123016	0.161034	0.0429448	0.0876597
rs4149057	0.182292	0.270492	0.141414	0.141593	0.0454545	0.123529	0.152778	0.531915	0.570312	0.435294	0.495192	0.193548	0.228155	0.209524	0.341346	0.237374	0.681818	0.515152	0.637363	0.621495	0.584112	0.430233	0.451456	0.411765	0.546875	0.426471	0.144478	0.504323	0.243056	0.607356	0.452965	0.367412
rs4244285	0.151042	0.139344	0.207071	0.132743	0.212121	0.176471	0.166667	0.106383	0.125	0.0588235	0.129808	0.263441	0.334951	0.352381	0.322115	0.282828	0.131313	0.217172	0.142857	0.14486	0.0934579	0.325581	0.330097	0.372549	0.34375	0.411765	0.170197	0.105187	0.3125	0.145129	0.357873	0.221446
rs429358	0.255208	0.204918	0.242424	0.274336	0.378788	0.258824	0.236111	0.154255	0.0859375	0.0588235	0.105769	0.102151	0.101942	0.0571429	0.0817308	0.0909091	0.176768	0.186869	0.175824	0.140187	0.102804	0.0872093	0.0485437	0.0833333	0.0833333	0.132353	0.267776	0.103746	0.0863095	0.15507	0.0869121	0.150559
rs4417205	0.171875	0.147541	0.222222	0.163717	0.237374	0.194118	0.222222	0.106383	0.132812	0.0647059	0.125	0.263441	0.334951	0.352381	0.322115	0.282828	0.131313	0.217172	0.142857	0.14486	0.0934579	0.325581	0.330097	0.372549	0.34375	0.411765	0.196672	0.106628	0.3125	0.145129	0.357873	0.228634
rs45449995	0.03125	0.0409836	0.0505051	0.079646	0.0656566	0.0294118	0.0555556	0.0106383	0.0078125	0	0.0288462	0.00537634	0	0	0	0.010101	0.010101	0.020202	0.032967	0.0233645	0.0327103	0.0116279	0.00485437	0.00980392	0.03125	0.0245098	0.0521936	0.0129683	0.00297619	0.0238569	0.0163599	0.0241613
rs45467195	0	0	0	0	0	0	0	0.00531915	0	0.00588235	0.0240385	0	0	0	0	0	0.0151515	0.0151515	0.0164835	0.0046729	0.0046729	0	0	0	0	0	0	0.0100865	0	0.0109344	0	0.00359425
rs45477599	0	0	0	0	0.0151515	0	0	0	0	0	0	0	0	0	0	0	0	0	0	0	0	0	0	0	0	0	0.00226929	0	0	0	0	0.000599042
rs45486893	0	0	0	0	0	0	0	0	0	0	0	0	0	0	0.00961538	0	0	0.010101	0	0	0	0	0	0	0	0	0	0	0.00198413	0.00198807	0	0.000798722
rs45507691	0.0208333	0.00819672	0	0	0	0	0	0.0691489	0.0234375	0.00588235	0.0336538	0	0	0	0	0	0.0505051	0.0353535	0.0659341	0.0420561	0.0514019	0.0116279	0.00970874	0.00490196	0.0208333	0	0.00378215	0.0345821	0	0.0487078	0.00920245	0.0173722
rs45518335	0.0104167	0.00819672	0	0	0.0151515	0	0.0138889	0	0	0	0	0	0	0	0	0	0	0	0	0	0	0	0	0	0	0	0.00680787	0	0	0	0	0.00179712
rs45523834	0.0416667	0.0245902	0.040404	0.0309735	0.0252525	0.0941176	0.0462963	0.00531915	0	0	0	0	0	0	0	0	0	0	0	0	0	0	0	0	0	0	0.0431165	0.00144092	0	0	0	0.0115815
rs45532639	0	0	0	0.00884956	0	0.00588235	0	0	0	0	0	0	0	0	0	0	0	0	0	0.0046729	0	0	0	0	0	0	0.00226929	0	0	0.000994036	0	0.000798722
rs45535938	0	0	0	0	0	0	0	0	0	0.00588235	0	0.0698925	0.0291262	0.0571429	0.0576923	0.0808081	0	0	0	0	0.0046729	0.00581395	0.00485437	0	0.00520833	0.00490196	0	0.00144092	0.0585317	0.000994036	0.00408998	0.0129792
rs45554333	0.03125	0.0245902	0.020202	0.00884956	0.0757576	0.00588235	0.0277778	0.0425532	0.046875	0.164706	0.0240385	0.0537634	0.0145631	0.0333333	0.00961538	0.030303	0	0.030303	0	0.00934579	0.0140187	0.0348837	0.0242718	0.0392157	0.0677083	0.0441176	0.0279879	0.0677233	0.0277778	0.0109344	0.0419223	0.0327476
rs45618543	0.0104167	0.00819672	0.0151515	0.00884956	0	0.0117647	0.0138889	0	0.0078125	0	0	0	0	0	0	0	0	0	0	0	0	0	0	0	0	0	0.00983359	0.00144092	0	0	0	0.00279553
rs45625338	0	0	0	0	0	0	0	0	0	0	0	0.0215054	0.0728155	0.0571429	0.0480769	0.020202	0	0	0	0	0	0.00581395	0	0	0	0	0	0	0.0446429	0	0.00102249	0.0091853
rs4633	0.328125	0.319672	0.29798	0.261062	0.323232	0.235294	0.296296	0.367021	0.398438	0.352941	0.403846	0.263441	0.300971	0.261905	0.274038	0.247475	0.464646	0.590909	0.527473	0.462617	0.457944	0.447674	0.432039	0.45098	0.53125	0.367647	0.293495	0.380403	0.269841	0.499006	0.444785	0.371605
rs4646487	0.255208	0.147541	0.191919	0.199115	0.126263	0.241176	0.240741	0.106383	0.132812	0.135294	0.0913462	0.27957	0.140777	0.219048	0.192308	0.237374	0.161616	0.131313	0.131868	0.102804	0.158879	0.186047	0.276699	0.205882	0.25	0.22549	0.202723	0.113833	0.212302	0.137177	0.230061	0.184505
rs4646491	0.046875	0.106557	0.0505051	0	0.040404	0.0117647	0.0416667	0.164894	0.148438	0.247059	0.163462	0.134409	0.330097	0.304762	0.326923	0.161616	0.136364	0.156566	0.164835	0.102804	0.0981308	0.139535	0.0679612	0.147059	0.09375	0.122549	0.0385779	0.181556	0.25496	0.130219	0.113497	0.134984
rs4646903	0.244792	0.270492	0.212121	0.216814	0.20202	0.276471	0.240741	0.340426	0.398438	0.752941	0.201923	0.564516	0.436893	0.404762	0.322115	0.434343	0.0909091	0.136364	0.104396	0.0841121	0.121495	0.406977	0.305825	0.333333	0.317708	0.343137	0.234493	0.410663	0.429563	0.107356	0.339468	0.293131
rs4663871	0.119792	0.0983607	0.161616	0.0973451	0.20202	0.0705882	0.0740741	0.175532	0.15625	0.158824	0.139423	0.284946	0.135922	0.252381	0.139423	0.262626	0.217172	0.212121	0.241758	0.200935	0.233645	0.232558	0.23301	0.210784	0.182292	0.230392	0.118759	0.157061	0.213294	0.220676	0.217791	0.182907
rs4680	0.322917	0.270492	0.277778	0.256637	0.287879	0.235294	0.305556	0.361702	0.398438	0.352941	0.399038	0.268817	0.315534	0.280952	0.283654	0.247475	0.464646	0.590909	0.527473	0.471963	0.453271	0.44186	0.436893	0.446078	0.520833	0.362745	0.280635	0.377522	0.279762	0.5	0.440695	0.369209
rs470089	0.390625	0.319672	0.257576	0.429204	0.29798	0.276471	0.402778	0.212766	0.078125	0.0470588	0.245192	0.0483871	0.0631068	0.0761905	0.105769	0.0505051	0.217172	0.227273	0.192308	0.252336	0.205607	0.232558	0.257282	0.22549	0.302083	0.338235	0.344175	0.157061	0.0694444	0.219682	0.271984	0.223842
rs470091	0.40625	0.319672	0.262626	0.429204	0.323232	0.282353	0.416667	0.212766	0.078125	0.0470588	0.245192	0.0483871	0.0631068	0.0761905	0.105769	0.0505051	0.217172	0.227273	0.192308	0.252336	0.205607	0.232558	0.257282	0.22549	0.302083	0.338235	0.354009	0.157061	0.0694444	0.219682	0.271984	0.226438
rs4802101	0.9375	0.885246	0.989899	0.946903	0.90404	0.964706	0.953704	0.765957	0.773438	0.9	0.697115	0.698925	0.674757	0.628571	0.668269	0.631313	0.585859	0.550505	0.56044	0.607477	0.621495	0.732558	0.800971	0.705882	0.729167	0.769608	0.943268	0.779539	0.659722	0.586481	0.748466	0.753794
rs4803418	0.145833	0.147541	0.0808081	0.0707965	0.121212	0.0764706	0.0509259	0.329787	0.414062	0.411765	0.264423	0.370968	0.495146	0.471429	0.418269	0.409091	0.277778	0.373737	0.296703	0.369159	0.275701	0.360465	0.359223	0.338235	0.317708	0.333333	0.0953101	0.345821	0.434524	0.319085	0.341513	0.291334
rs4803419	0.135417	0.155738	0.040404	0.079646	0.0858586	0.0764706	0.037037	0.329787	0.421875	0.417647	0.274038	0.370968	0.495146	0.47619	0.418269	0.409091	0.282828	0.373737	0.302198	0.369159	0.271028	0.360465	0.359223	0.338235	0.317708	0.333333	0.0824508	0.351585	0.435516	0.32008	0.341513	0.289137
rs4818	0.822917	0.786885	0.853535	0.778761	0.858586	0.876471	0.828704	0.654255	0.757812	0.852941	0.596154	0.688172	0.645631	0.695238	0.629808	0.636364	0.560606	0.732323	0.593407	0.574766	0.53271	0.69186	0.669903	0.730392	0.739583	0.598039	0.829803	0.704611	0.65873	0.597416	0.685072	0.703075
rs4917623	0.213542	0.327869	0.151515	0.207965	0.176768	0.211765	0.152778	0.632979	0.6875	0.870588	0.543269	0.591398	0.529126	0.514286	0.543269	0.60101	0.525253	0.484848	0.510989	0.5	0.518692	0.406977	0.378641	0.367647	0.380208	0.294118	0.198185	0.674352	0.554563	0.507952	0.364008	0.430511
rs4926581	0.1875	0.155738	0.247475	0.190265	0.186869	0.211765	0.240741	0.234043	0.257812	0.223529	0.221154	0.5	0.538835	0.528571	0.591346	0.606061	0.227273	0.186869	0.186813	0.17757	0.186916	0.505814	0.514563	0.45098	0.557292	0.509804	0.205749	0.231988	0.553571	0.192843	0.507157	0.335663
rs4926600	0.046875	0.0245902	0.040404	0.0265487	0.030303	0.0705882	0.0416667	0.0691489	0.140625	0.135294	0.0817308	0.258065	0.257282	0.290476	0.370192	0.353535	0.0959596	0.0454545	0.0824176	0.088785	0.088785	0.25	0.228155	0.254902	0.296875	0.25	0.0400908	0.102305	0.306548	0.0805169	0.255624	0.152556
rs4986782	0.00520833	0.00819672	0	0	0	0	0	0.0106383	0	0	0.00480769	0	0	0	0	0	0.010101	0.0454545	0.021978	0.0186916	0.0046729	0	0	0	0.0104167	0.00490196	0.00151286	0.00432277	0	0.0198807	0.00306748	0.00559105
rs4986783	0.00520833	0	0	0	0.0151515	0	0	0.0159574	0.0234375	0.0117647	0.00961538	0.00537634	0.00485437	0	0.00961538	0.010101	0.030303	0	0.043956	0.0186916	0.0327103	0.0174419	0.0679612	0.0588235	0.015625	0.0392157	0.00302572	0.0144092	0.00595238	0.0248509	0.0408998	0.0169728
rs4986850	0.0208333	0.0327869	0	0	0.010101	0.0176471	0.00925926	0.0585106	0.0390625	0.0411765	0.0817308	0	0	0	0	0	0.111111	0.0707071	0.0824176	0.0841121	0.0700935	0.0174419	0.00970874	0.0588235	0.0364583	0.0245098	0.0113464	0.0576369	0	0.083499	0.0296524	0.0335463
rs4986852	0	0.0163934	0	0.00442478	0	0	0	0.0265957	0	0	0.0432692	0	0	0	0	0	0.0454545	0.00505051	0.010989	0.0420561	0.0373832	0	0	0.00490196	0.00520833	0.00490196	0.00226929	0.0201729	0	0.028827	0.00306748	0.00978435
rs4986888	0.0677083	0.0655738	0.0505051	0.0486726	0.040404	0.0529412	0.0648148	0	0.0078125	0.00588235	0.00480769	0	0	0	0	0	0	0	0	0.00934579	0.0046729	0	0	0	0	0	0.0552194	0.00432277	0	0.00298211	0	0.0157748
rs4986891	0	0.0163934	0.0151515	0.00442478	0	0	0.00462963	0	0	0	0	0	0	0	0	0	0	0	0	0	0	0	0	0	0	0	0.00529501	0	0	0	0	0.00139776
rs4986893	0.00520833	0	0	0	0.010101	0	0	0	0	0	0	0.0752688	0.0436893	0.047619	0.0721154	0.040404	0	0	0	0	0	0.0232558	0.00485437	0.00490196	0.015625	0.0147059	0.00226929	0	0.0555556	0	0.0122699	0.0141773
rs4986894	0.151042	0.139344	0.207071	0.128319	0.181818	0.158824	0.166667	0.106383	0.125	0.0588235	0.120192	0.263441	0.334951	0.352381	0.322115	0.282828	0.131313	0.217172	0.142857	0.14486	0.0934579	0.325581	0.330097	0.372549	0.34375	0.411765	0.162632	0.102305	0.3125	0.145129	0.357873	0.21905
rs4986907	0.0104167	0.0163934	0.00505051	0.0221239	0.00505051	0.0176471	0.0416667	0	0.0078125	0	0.00480769	0	0	0	0	0	0	0	0	0.0046729	0	0	0	0	0	0	0.0173979	0.00288184	0	0.000994036	0	0.00519169
rs4986908	0	0	0	0	0	0	0	0	0	0	0.00480769	0	0	0	0	0	0.00505051	0	0.0164835	0.0046729	0	0.00581395	0	0.00980392	0	0	0	0.00144092	0	0.00497018	0.00306748	0.00179712
rs4986910	0	0.00819672	0	0	0	0	0	0.0212766	0	0	0.00480769	0	0	0	0	0	0.0151515	0.010101	0.010989	0	0	0	0	0	0	0	0.00075643	0.00720461	0	0.00695825	0	0.00259585
rs4986913	0	0	0	0	0	0	0	0	0	0	0	0	0	0	0	0	0	0	0	0	0	0	0.00485437	0	0	0.00490196	0	0	0	0	0.00204499	0.000399361
rs4986988	0.00520833	0	0	0	0.0151515	0	0	0.0159574	0.015625	0.0117647	0.00961538	0.00537634	0.00485437	0	0.00961538	0.010101	0.030303	0	0.043956	0.0186916	0.0327103	0.0174419	0.0679612	0.0588235	0.015625	0.0392157	0.00302572	0.0129683	0.00595238	0.0248509	0.0408998	0.0167732
rs4986989	0.00520833	0	0	0	0.0151515	0	0	0.0159574	0.015625	0.0117647	0.00961538	0.00537634	0.00485437	0	0.00961538	0.010101	0.030303	0	0.043956	0.0186916	0.0327103	0.0174419	0.0679612	0.0588235	0.015625	0.0392157	0.00302572	0.0129683	0.00595238	0.0248509	0.0408998	0.0167732
rs4986990	0.00520833	0	0	0	0.0151515	0	0	0.0159574	0.015625	0.0117647	0.00961538	0.00537634	0.00970874	0	0.00961538	0.010101	0.030303	0	0.043956	0.0186916	0.0327103	0.0174419	0.0679612	0.0588235	0.015625	0.0392157	0.00302572	0.0129683	0.00694444	0.0248509	0.0408998	0.0169728
rs4986991	0.046875	0	0.010101	0.00442478	0.020202	0.00588235	0.00925926	0	0	0	0.00480769	0	0	0	0	0	0	0	0	0	0	0	0	0	0	0	0.0143722	0.00144092	0	0	0	0.00399361
rs4986992	0.046875	0.0163934	0.020202	0.00442478	0.0151515	0.00588235	0.00925926	0	0	0	0.00480769	0	0	0	0	0	0	0	0	0	0	0	0	0	0	0	0.0166415	0.00144092	0	0	0	0.00459265
rs4987076	0.00520833	0	0	0	0.0151515	0	0	0.0159574	0.015625	0.0117647	0.00961538	0.00537634	0.00485437	0	0.00961538	0.010101	0.030303	0	0.0494505	0.0186916	0.0327103	0.0174419	0.0679612	0.0588235	0.015625	0.0392157	0.00302572	0.0129683	0.00595238	0.0258449	0.0408998	0.0169728
rs5030656	0	0.00819672	0	0	0	0	0	0.0159574	0.0078125	0	0.0240385	0	0	0	0	0	0.020202	0.0151515	0.0384615	0.0233645	0.0327103	0	0	0	0	0	0.00075643	0.0129683	0	0.0258449	0	0.0071885
rs5030839	0.00520833	0	0	0.00442478	0	0	0	0.00531915	0.0078125	0.00588235	0	0	0	0	0	0	0.00505051	0	0	0.0280374	0.00934579	0	0	0	0	0	0.00151286	0.00432277	0	0.00894632	0	0.00279553
rs5030865	0	0	0	0	0	0	0	0	0	0	0	0.016129	0.00485437	0	0.00480769	0.0252525	0	0	0	0	0	0	0	0	0	0	0	0	0.00992063	0	0	0.00199681
rs5030867	0	0	0	0	0	0	0	0	0	0	0	0	0	0	0	0	0	0	0	0	0	0.0116279	0.0145631	0.00490196	0.0104167	0.00490196	0	0	0	0	0.00920245	0.00179712
rs5030868	0	0	0	0	0	0	0	0	0	0	0	0	0	0	0	0	0	0	0	0	0	0	0	0	0.0104167	0.00490196	0	0	0	0	0.00306748	0.000599042
rs518147	0.666667	0.614754	0.585859	0.59292	0.636364	0.694118	0.606481	0.702128	0.539062	0.658824	0.692308	0.817204	0.839806	0.814286	0.875	0.838384	0.60101	0.742424	0.620879	0.705607	0.668224	0.604651	0.723301	0.612745	0.59375	0.637255	0.626324	0.658501	0.837302	0.668986	0.635992	0.683706
rs532545	0.0677083	0.0737705	0	0.0707965	0.0757576	0.0941176	0.0416667	0.271277	0.320312	0.376471	0.278846	0.0860215	0.116505	0.0857143	0.197115	0.0959596	0.292929	0.176768	0.307692	0.350467	0.378505	0.180233	0.228155	0.240196	0.239583	0.215686	0.0590015	0.308357	0.117063	0.303181	0.221881	0.186102
rs55700793	0	0.0163934	0.00505051	0.00442478	0.00505051	0.00588235	0.00462963	0.00531915	0	0	0	0	0	0	0	0	0	0	0	0	0	0	0	0	0	0	0.00529501	0.00144092	0	0	0	0.00159744
rs55781538	0	0.00819672	0	0	0	0	0	0.0106383	0.0234375	0	0.0192308	0	0	0	0	0	0.0353535	0.010101	0.021978	0.0046729	0.0140187	0.00581395	0.0194175	0.00490196	0.0104167	0.00490196	0.00075643	0.0129683	0	0.0168986	0.00920245	0.0071885
rs55785340	0	0	0	0	0	0	0	0	0	0	0	0	0	0	0	0	0	0.010101	0	0	0	0	0	0	0	0	0	0	0	0.00198807	0	0.000399361
rs55886062	0	0	0	0	0	0	0	0	0	0	0	0	0	0	0	0	0	0.00505051	0	0	0	0	0	0	0	0	0	0	0	0.000994036	0	0.000199681
rs55897648	0	0	0	0	0	0	0	0	0	0	0.00480769	0	0	0	0	0	0	0	0.00549451	0	0	0	0	0	0	0	0	0.00144092	0	0.000994036	0	0.000399361
rs55901263	0	0	0	0	0	0	0	0	0	0	0	0.00537634	0.00485437	0	0	0	0	0	0	0	0	0	0	0	0	0	0	0	0.00198413	0	0	0.000399361
rs55918055	0	0	0	0	0	0	0	0	0	0	0	0	0	0	0	0	0.00505051	0	0.010989	0	0	0	0	0	0	0	0	0	0	0.00298211	0	0.000599042
rs55951658	0	0	0	0	0	0	0	0	0	0	0	0	0	0.0047619	0	0.020202	0	0	0	0	0	0	0	0	0	0	0	0	0.00496032	0	0	0.000998403
rs56161402	0.0104167	0.0163934	0.0454545	0.0265487	0.010101	0	0.0231481	0.00531915	0	0.00588235	0	0	0	0	0	0	0	0	0	0	0	0	0	0	0	0	0.0196672	0.00288184	0	0	0	0.00559105
rs56172717	0	0	0	0	0	0	0	0	0	0	0.00480769	0	0	0	0	0	0	0.010101	0	0.0140187	0	0	0	0	0	0	0	0.00144092	0	0.00497018	0	0.00119808
rs56175199	0	0	0	0	0	0	0	0	0	0	0	0	0	0	0.00480769	0	0	0	0	0	0	0	0	0	0	0	0	0	0.000992063	0	0	0.000199681
rs56240201	0	0.00819672	0	0	0	0	0	0	0	0	0	0	0	0	0	0	0	0	0	0	0	0	0	0	0	0	0.00075643	0	0	0	0	0.000199681
rs56256500	0.046875	0.00819672	0.0454545	0.00442478	0.010101	0.00588235	0.0138889	0	0	0	0	0	0	0	0	0	0	0	0	0	0	0	0	0	0	0	0.0196672	0	0	0	0	0.00519169
rs56324128	0	0	0	0	0	0	0	0	0	0	0	0	0	0	0	0	0	0.00505051	0	0	0.0046729	0	0	0	0	0	0	0	0	0.00198807	0	0.000399361
rs56379106	0	0.00819672	0	0	0	0	0	0	0	0	0	0	0	0	0	0	0.020202	0	0.00549451	0	0	0	0	0	0	0	0.00075643	0	0	0.00497018	0	0.00119808
rs56385016	0	0	0	0	0	0	0	0.00531915	0.0078125	0	0.00480769	0	0	0	0	0	0.0151515	0.00505051	0.010989	0	0	0	0.0194175	0	0	0.00490196	0	0.00432277	0	0.00596421	0.00511247	0.00279553
rs56387565	0	0	0	0	0.00505051	0	0	0	0	0	0	0	0	0	0	0	0	0	0	0	0	0	0	0	0	0	0.00075643	0	0	0	0	0.000199681
rs56393504	0.0520833	0.0409836	0.030303	0.0309735	0.010101	0.0411765	0.037037	0	0	0	0	0	0	0	0	0	0.00505051	0	0	0	0	0.00581395	0	0	0	0	0.0340393	0	0	0.000994036	0.00102249	0.00938498
rs56411402	0	0	0	0	0	0	0	0	0	0	0	0	0	0.0047619	0	0.0151515	0	0	0	0	0	0	0	0	0	0	0	0	0.00396825	0	0	0.000798722
rs56935833	0	0	0	0	0	0	0	0	0	0	0	0	0	0	0.00480769	0	0	0	0	0	0	0	0	0	0	0	0	0	0.000992063	0	0	0.000199681
rs57409622	0.0104167	0	0.00505051	0.00884956	0	0.00588235	0	0	0	0	0	0	0	0	0	0	0	0	0	0	0	0	0	0	0	0	0.00453858	0	0	0	0	0.00119808
rs5742911	0.192708	0.147541	0.121212	0.216814	0.0858586	0.170588	0.171296	0.265957	0.296875	0.247059	0.326923	0.435484	0.402913	0.357143	0.461538	0.39899	0.29798	0.29798	0.252747	0.35514	0.224299	0.232558	0.145631	0.166667	0.223958	0.20098	0.159607	0.285303	0.410714	0.286282	0.192229	0.259385
rs57505750	0	0	0	0	0.010101	0	0	0	0	0	0	0	0	0	0	0	0	0	0	0	0	0	0	0	0	0	0.00151286	0	0	0	0	0.000399361
rs58285195	0.0729167	0.0819672	0.0505051	0.0309735	0.10101	0.1	0.0509259	0.0691489	0.09375	0.123529	0.0432692	0.016129	0.0145631	0.0238095	0.0528846	0.0353535	0.030303	0.0555556	0.0494505	0.046729	0.0327103	0.0872093	0.121359	0.0686275	0.0729167	0.0833333	0.0673222	0.0792507	0.0287698	0.0427435	0.0869121	0.0601038
rs58597806	0	0	0	0	0	0	0	0	0	0	0	0	0	0	0.00480769	0	0	0	0	0	0	0	0	0	0	0	0	0	0.000992063	0	0	0.000199681
rs58704432	0	0	0	0	0	0	0	0	0	0	0	0.0107527	0.00970874	0.0142857	0.0144231	0	0	0	0	0	0	0	0	0	0	0	0	0	0.00992063	0	0	0.00199681
rs58973490	0.00520833	0	0	0	0	0	0	0	0	0	0	0	0	0	0	0	0	0	0.0164835	0	0.0046729	0	0	0	0	0	0.00075643	0	0	0.00397614	0	0.000998403
rs59113707	0.0520833	0.057377	0.0757576	0.0619469	0.0252525	0.0882353	0.0694444	0.00531915	0	0.00588235	0.00961538	0	0	0	0	0	0	0	0	0	0	0	0	0	0	0	0.0612708	0.00576369	0	0	0	0.0169728
rs59421388	0.0885417	0.0409836	0.0808081	0.137168	0.171717	0.0941176	0.106481	0.00531915	0	0	0.00480769	0	0	0	0	0	0	0	0	0	0	0	0	0	0	0	0.107413	0.00288184	0	0	0	0.028754
rs59502379	0.046875	0.0245902	0.0656566	0.0176991	0.0505051	0.0235294	0.0509259	0	0	0.00588235	0.00480769	0	0	0	0	0	0	0	0	0	0	0	0	0	0	0	0.0408472	0.00288184	0	0	0	0.0111821
rs59552350	0	0.0163934	0.0151515	0.00442478	0	0	0.00462963	0	0	0	0	0	0	0	0	0	0	0	0	0	0	0	0	0	0	0	0.00529501	0	0	0	0	0.00139776
rs602950	0.078125	0.114754	0.0454545	0.0530973	0.0757576	0.0823529	0.0324074	0.276596	0.320312	0.376471	0.274038	0.0860215	0.116505	0.0952381	0.206731	0.10101	0.29798	0.176768	0.307692	0.350467	0.373832	0.180233	0.228155	0.240196	0.239583	0.215686	0.065053	0.308357	0.122024	0.303181	0.221881	0.188698
rs61261057	0.0416667	0.0163934	0.0151515	0.0221239	0	0.0235294	0.0231481	0	0	0	0	0	0	0	0	0	0	0	0	0	0	0	0	0	0	0	0.0204236	0	0	0	0	0.00539137
rs61495246	0	0	0.0151515	0	0.00505051	0.0117647	0.00462963	0	0	0	0	0	0	0	0	0	0	0	0	0	0	0	0	0	0	0	0.00529501	0	0	0	0	0.00139776
rs61736512	0.09375	0.0409836	0.0808081	0.137168	0.171717	0.1	0.111111	0.00531915	0	0	0.00480769	0	0	0	0	0	0	0	0	0	0	0	0	0	0	0	0.109682	0.00288184	0	0	0	0.029353
rs61764030	0	0	0	0	0	0	0	0.00531915	0.0078125	0	0.00480769	0	0	0	0	0	0.00505051	0	0.00549451	0.0140187	0.0046729	0	0	0	0	0	0	0.00432277	0	0.00596421	0	0.00179712
rs6269	0.572917	0.663934	0.626263	0.628319	0.626263	0.652941	0.643519	0.62234	0.734375	0.847059	0.581731	0.688172	0.626214	0.695238	0.649038	0.631313	0.560606	0.717172	0.598901	0.560748	0.509346	0.69186	0.635922	0.720588	0.723958	0.607843	0.628593	0.685879	0.657738	0.587475	0.674847	0.643171
rs6318	0.354167	0.352459	0.348485	0.473451	0.378788	0.329412	0.5	0.0797872	0.0859375	0.0352941	0.120192	0.0268817	0.0145631	0	0.0288462	0.0151515	0.212121	0.0959596	0.203297	0.121495	0.17757	0.0639535	0.0970874	0.0784314	0.125	0.0294118	0.397882	0.0821326	0.0168651	0.161034	0.0787321	0.167532
rs6413419	0.21875	0.237705	0.292929	0.216814	0.136364	0.241176	0.319444	0.0265957	0.03125	0.0235294	0.0865385	0	0	0	0	0	0.0252525	0.030303	0.00549451	0.0514019	0.0373832	0.0116279	0.0194175	0.00490196	0.0104167	0.00980392	0.238275	0.0446686	0	0.0308151	0.0112474	0.077476
rs6413438	0	0	0	0.00442478	0	0.00588235	0	0	0	0	0.00480769	0	0	0	0	0	0	0	0	0	0	0	0	0	0	0	0.00151286	0.00144092	0	0	0	0.000599042
rs6413474	0	0	0	0	0	0	0	0.0106383	0	0.00588235	0.00480769	0	0	0	0	0	0.00505051	0.010101	0.0274725	0.00934579	0.00934579	0.00581395	0.00485437	0.00980392	0.0104167	0.00980392	0	0.00576369	0	0.0119284	0.00817996	0.00479233
rs6431625	0.697917	0.647541	0.772727	0.747788	0.732323	0.723529	0.763889	0.420213	0.40625	0.464706	0.423077	0.155914	0.106796	0.114286	0.168269	0.0858586	0.358586	0.393939	0.32967	0.331776	0.32243	0.406977	0.461165	0.416667	0.458333	0.460784	0.732224	0.429395	0.125992	0.346918	0.441718	0.434105
rs6443624	0.536458	0.467213	0.530303	0.628319	0.429293	0.576471	0.449074	0.281915	0.234375	0.217647	0.350962	0.182796	0.0679612	0.0857143	0.0865385	0.126263	0.20202	0.116162	0.258242	0.303738	0.308411	0.215116	0.291262	0.328431	0.291667	0.235294	0.519667	0.278098	0.108135	0.239563	0.274029	0.299121
rs6661132	0.0208333	0.0163934	0	0.0176991	0.00505051	0.0235294	0.00462963	0.0638298	0.140625	0.135294	0.0817308	0.258065	0.257282	0.295238	0.370192	0.353535	0.0959596	0.0454545	0.0824176	0.088785	0.0747664	0.232558	0.223301	0.22549	0.28125	0.245098	0.0121029	0.100865	0.30754	0.0775348	0.241309	0.141773
rs66915469	0	0	0	0	0	0	0	0	0	0	0	0	0.00485437	0	0.00961538	0	0	0	0	0	0	0	0	0	0	0	0	0	0.00297619	0	0	0.000599042
rs6706232	0.796875	0.729508	0.878788	0.862832	0.833333	0.817647	0.865741	0.484043	0.515625	0.605882	0.480769	0.456989	0.26699	0.37619	0.302885	0.393939	0.429293	0.419192	0.379121	0.397196	0.443925	0.622093	0.626214	0.637255	0.651042	0.671569	0.833585	0.518732	0.357143	0.414513	0.642127	0.572484
rs6755571	0.03125	0.00819672	0.010101	0	0	0	0	0.0744681	0.0234375	0.00588235	0.0384615	0	0	0	0	0	0.0505051	0.0353535	0.0604396	0.0420561	0.0514019	0.0116279	0.00970874	0.00490196	0.0208333	0	0.00680787	0.037464	0	0.0477137	0.00920245	0.0183706
rs6759892	0.421875	0.352459	0.343434	0.336283	0.40404	0.370588	0.402778	0.420213	0.320312	0.252941	0.365385	0.215054	0.286408	0.242857	0.221154	0.151515	0.39899	0.459596	0.346154	0.336449	0.373832	0.436047	0.485437	0.47549	0.484375	0.495098	0.376702	0.34438	0.224206	0.382704	0.476483	0.36222
rs67784355	0	0	0	0	0	0	0.00462963	0	0	0	0	0	0	0	0	0	0	0	0.00549451	0	0	0	0	0	0	0	0.00075643	0	0	0.000994036	0	0.000399361
rs67807361	0	0	0	0	0	0	0	0	0	0	0	0	0	0	0	0	0	0	0	0	0	0.00581395	0.0145631	0.00980392	0	0.00490196	0	0	0	0	0.00715746	0.00139776
rs6787801	0.473958	0.401639	0.525253	0.530973	0.434343	0.6	0.49537	0.526596	0.4375	0.335294	0.456731	0.370968	0.378641	0.438095	0.408654	0.439394	0.474747	0.60101	0.445055	0.46729	0.5	0.453488	0.543689	0.519608	0.505208	0.47549	0.498487	0.442363	0.407738	0.498012	0.501022	0.472843
rs6798347	0.661458	0.631148	0.616162	0.69469	0.59596	0.752941	0.694444	0.781915	0.765625	0.776471	0.788462	0.715054	0.684466	0.742857	0.653846	0.813131	0.808081	0.823232	0.774725	0.785047	0.799065	0.587209	0.61165	0.612745	0.661458	0.642157	0.664902	0.779539	0.72123	0.798211	0.623722	0.710863
rs680055	0.276042	0.303279	0.353535	0.389381	0.585859	0.4	0.314815	0.0585106	0.0390625	0.0176471	0.0817308	0.00537634	0.00485437	0	0	0	0.0555556	0.0505051	0.021978	0.0654206	0.0794393	0.0174419	0.0436893	0.0245098	0.0364583	0.0294118	0.378215	0.0518732	0.00198413	0.055666	0.0306748	0.124601
rs6801273	0.4375	0.442623	0.353535	0.353982	0.484848	0.458824	0.388889	0.574468	0.617188	0.735294	0.673077	0.72043	0.587379	0.657143	0.581731	0.762626	0.656566	0.580808	0.675824	0.593458	0.672897	0.604651	0.621359	0.637255	0.635417	0.661765	0.413011	0.651297	0.659722	0.635189	0.632924	0.583267
rs680244	0.364583	0.368852	0.424242	0.353982	0.378788	0.435294	0.444444	0.212766	0.21875	0.0941176	0.317308	0.198925	0.228155	0.219048	0.163462	0.343434	0.409091	0.424242	0.478022	0.294393	0.359813	0.302326	0.334951	0.397059	0.354167	0.392157	0.396369	0.216138	0.230159	0.389662	0.357873	0.329073
rs6921269	0.015625	0.0327869	0.030303	0.039823	0.00505051	0.0588235	0.00925926	0	0.015625	0	0	0	0	0	0	0	0	0	0	0	0	0	0	0	0	0	0.026475	0.00288184	0	0	0	0.00738818
rs7088784	0.135417	0.0737705	0.111111	0.0663717	0.116162	0.0764706	0.101852	0.0691489	0.0234375	0.0117647	0.0432692	0.107527	0.0873786	0.0904762	0.120192	0.0757576	0.0808081	0.0454545	0.0659341	0.0841121	0.0841121	0.139535	0.135922	0.112745	0.119792	0.107843	0.0983359	0.0389049	0.0962302	0.0725646	0.122699	0.0892572
rs717620	0.0364583	0.0327869	0.0555556	0.0265487	0.030303	0.00588235	0.0277778	0.180851	0.203125	0.0823529	0.197115	0.193548	0.228155	0.22381	0.192308	0.247475	0.176768	0.217172	0.214286	0.219626	0.205607	0.180233	0.0728155	0.0490196	0.0625	0.122549	0.0310136	0.165706	0.217262	0.206759	0.095092	0.134984
rs7196161	0.526042	0.540984	0.494949	0.513274	0.560606	0.394118	0.550926	0.574468	0.515625	0.611765	0.567308	0.177419	0.0436893	0.109524	0.0961538	0.156566	0.560606	0.671717	0.653846	0.626168	0.53271	0.848837	0.825243	0.897059	0.791667	0.882353	0.512859	0.570605	0.115079	0.607356	0.849693	0.525559
rs72466456	1	0.991803	1	1	1	1	1	1	1	0.994118	1	1	1	1	1	1	1	1	1	1	1	1	1	1	1	1	0.999244	0.998559	1	1	1	0.999601
rs7246981	0.0104167	0	0	0	0	0	0	0.175532	0.171875	0.4	0.129808	0	0	0	0.00480769	0	0.0909091	0.131313	0.126374	0.0373832	0.0607477	0.0581395	0.0194175	0.0294118	0.0625	0.0294118	0.00151286	0.216138	0.000992063	0.0874751	0.0388548	0.0557109
rs7254521	0.145833	0.155738	0.171717	0.119469	0.20202	0.147059	0.148148	0.12234	0.0546875	0.0352941	0.0961538	0	0.00485437	0.0047619	0	0.00505051	0.141414	0.131313	0.181319	0.158879	0.191589	0.151163	0.184466	0.0931373	0.09375	0.127451	0.155068	0.0806916	0.00297619	0.161034	0.129857	0.110423
rs72547592	0	0	0	0	0	0	0	0	0	0	0	0	0	0	0	0	0	0.010101	0	0	0	0	0	0	0	0	0	0	0	0.00198807	0	0.000399361
rs72549391	0	0	0	0	0	0	0	0	0	0	0	0	0	0	0	0	0	0	0.00549451	0	0	0.00581395	0.00485437	0	0	0	0	0	0	0.000994036	0.00204499	0.000599042
rs72549432	0.00520833	0.0245902	0.010101	0.00442478	0.020202	0.00588235	0.00462963	0	0	0	0	0	0	0	0	0	0	0	0	0	0	0	0	0	0	0	0.00983359	0	0	0	0	0.00259585
rs72549435	0.00520833	0.00819672	0.010101	0	0.0252525	0.0117647	0.0138889	0.00531915	0	0	0	0	0.00485437	0	0	0	0	0	0	0	0	0	0	0	0	0	0.01059	0.00144092	0.000992063	0	0	0.00319489
rs72551330	0	0	0	0	0	0	0	0.0159574	0.0078125	0	0.00480769	0	0	0	0	0	0.0151515	0.0252525	0	0.0186916	0.0233645	0	0.00485437	0	0.00520833	0	0	0.00720461	0	0.0168986	0.00204499	0.00479233
rs72551332	0	0	0	0	0.010101	0	0	0	0	0	0.00480769	0	0	0	0	0	0	0	0	0	0.0046729	0	0	0	0	0	0.00151286	0.00144092	0	0.000994036	0	0.000798722
rs72552266	0	0	0	0	0	0	0	0.0106383	0	0.0117647	0	0	0	0	0.00480769	0	0.010101	0.010101	0.00549451	0.0046729	0.0280374	0	0	0.00490196	0.00520833	0	0	0.00576369	0.000992063	0.0119284	0.00204499	0.00379393
rs72552798	0	0	0	0	0	0	0	0	0	0.00588235	0	0	0	0	0	0	0	0	0	0	0	0	0	0	0	0	0	0.00144092	0	0	0	0.000199681
rs72552799	0	0	0	0	0	0	0	0	0	0	0	0	0	0	0	0	0	0.00505051	0	0	0	0	0	0	0	0	0	0	0	0.000994036	0	0.000199681
rs72554617	0	0	0	0	0	0	0	0	0	0	0	0	0.00485437	0	0	0	0	0	0	0	0	0	0	0	0	0	0	0	0.000992063	0	0	0.000199681
rs72554665	0	0	0	0	0	0	0	0	0	0	0	0.0376344	0.00485437	0	0	0.00505051	0	0	0	0	0	0	0	0	0	0	0	0	0.00892857	0	0	0.00179712
rs72558187	0	0	0	0	0	0	0	0	0	0	0	0.00537634	0	0	0.00480769	0.00505051	0	0	0	0	0	0	0	0	0	0	0	0	0.00297619	0	0	0.000599042
rs72558189	0	0	0	0	0	0	0	0	0	0	0	0.00537634	0	0	0	0	0	0	0	0	0	0.0290698	0.0194175	0.0196078	0.0104167	0.0245098	0	0	0.000992063	0	0.0204499	0.00419329
rs72558192	0	0	0	0	0	0	0	0	0	0	0	0	0.00485437	0	0	0	0	0	0	0	0	0	0	0	0	0	0	0	0.000992063	0	0	0.000199681
rs72559710	0	0	0	0	0	0	0	0	0	0	0	0	0.00485437	0.0047619	0	0.00505051	0	0	0	0	0	0	0	0	0	0	0	0	0.00297619	0	0	0.000599042
rs7294	0.458333	0.47541	0.479798	0.451327	0.429293	0.358824	0.513889	0.356383	0.351562	0.564706	0.341346	0.166667	0.0436893	0.109524	0.0961538	0.151515	0.313131	0.414141	0.417582	0.35514	0.336449	0.784884	0.665049	0.828431	0.692708	0.823529	0.453858	0.402017	0.112103	0.365805	0.758691	0.419728
rs7412	0.125	0.131148	0.0505051	0.132743	0.0454545	0.141176	0.106481	0.0851064	0.046875	0.00588235	0.0480769	0.102151	0.106796	0.0761905	0.0480769	0.171717	0.0656566	0.0707071	0.0769231	0.0560748	0.046729	0.0523256	0.038835	0.0490196	0.0364583	0.0441176	0.102874	0.0475504	0.100198	0.0626243	0.0439673	0.0750799
rs75386357	0	0	0	0	0	0	0	0	0.0078125	0.00588235	0	0	0	0	0	0	0	0	0	0	0	0	0	0.00490196	0.00520833	0	0	0.00288184	0	0	0.00204499	0.000798722
rs75543815	0	0	0	0	0	0	0	0	0	0	0	0	0.00485437	0	0	0	0	0	0	0	0	0	0	0	0	0	0	0	0.000992063	0	0	0.000199681
rs7574296	0.796875	0.729508	0.878788	0.862832	0.833333	0.817647	0.865741	0.489362	0.515625	0.605882	0.485577	0.456989	0.26699	0.37619	0.302885	0.393939	0.434343	0.419192	0.379121	0.397196	0.443925	0.622093	0.626214	0.637255	0.651042	0.671569	0.833585	0.521614	0.357143	0.415507	0.642127	0.573083
rs7586110	0.307292	0.286885	0.232323	0.212389	0.222222	0.241176	0.263889	0.356383	0.265625	0.0823529	0.326923	0.16129	0.271845	0.209524	0.211538	0.121212	0.378788	0.424242	0.340659	0.308411	0.350467	0.389535	0.461165	0.426471	0.411458	0.441176	0.249622	0.263689	0.196429	0.359841	0.427403	0.297724
rs7592281	0.119792	0.0983607	0.131313	0.128319	0.121212	0.111765	0.157407	0.0425532	0.0390625	0	0.0769231	0.11828	0.242718	0.180952	0.1875	0.106061	0.0454545	0.0757576	0	0.0280374	0.0186916	0.0639535	0.038835	0.0686275	0.0833333	0.0980392	0.126324	0.0417867	0.168651	0.0337972	0.0705521	0.0936502
rs76011927	0	0	0	0	0	0	0	0	0	0	0	0.0215054	0.0582524	0.052381	0.0528846	0.0454545	0	0.030303	0	0	0	0.0116279	0	0.00490196	0.00520833	0.0147059	0	0	0.046627	0.00596421	0.00715746	0.0119808
rs762551	0.630208	0.639344	0.520202	0.584071	0.479798	0.570588	0.541667	0.734043	0.734375	0.864706	0.706731	0.758065	0.635922	0.642857	0.600962	0.737374	0.727273	0.691919	0.730769	0.640187	0.621495	0.575581	0.524272	0.544118	0.541667	0.495098	0.562027	0.757925	0.672619	0.67992	0.534765	0.629792
rs76723693	0	0	0	0.0619469	0	0	0	0	0	0	0.00961538	0	0	0	0	0	0	0	0	0	0	0	0	0	0	0	0.01059	0.00288184	0	0	0	0.00319489
rs769258	0.015625	0	0	0	0	0	0	0.0265957	0.0234375	0.00588235	0.0480769	0.00537634	0.00485437	0.0047619	0	0	0.0555556	0.040404	0.0494505	0.0654206	0.0514019	0.00581395	0	0.00980392	0.0104167	0.00490196	0.00226929	0.0273775	0.00297619	0.0526839	0.00613497	0.0167732
rs776746	0.25	0.311475	0.106061	0.225664	0.121212	0.117647	0.166667	0.81383	0.765625	0.876471	0.735577	0.688172	0.68932	0.728571	0.745192	0.712121	0.959596	0.939394	0.945055	0.925234	0.948598	0.633721	0.723301	0.676471	0.635417	0.661765	0.18003	0.79683	0.713294	0.94334	0.667689	0.621406
rs77913725	0	0	0	0	0	0	0	0	0	0	0	0	0	0	0	0	0	0	0	0	0	0.0290698	0.0194175	0.0294118	0.015625	0.00980392	0	0	0	0	0.0204499	0.00399361
rs78478128	0	0	0	0	0	0	0	0	0	0	0	0	0	0	0	0	0	0	0	0	0	0.00581395	0	0	0	0	0	0	0	0	0.00102249	0.000199681
rs78482768	0	0	0	0	0	0	0	0	0	0	0.00480769	0	0	0	0	0	0.00505051	0	0	0.00934579	0.00934579	0	0	0	0	0	0	0.00144092	0	0.00497018	0	0.00119808
rs78873069	0	0	0	0	0	0	0	0.0106383	0.015625	0.0294118	0.0432692	0.0752688	0.0436893	0.047619	0.0288462	0.0353535	0	0	0	0	0	0.00581395	0	0	0.00520833	0	0	0.0259366	0.0456349	0	0.00204499	0.0131789
rs7900194	0.0833333	0.0327869	0.0757576	0.0176991	0.0707071	0.0352941	0.0509259	0	0	0	0.00480769	0	0	0	0	0	0.00505051	0	0	0.0046729	0	0	0	0	0.00520833	0	0.0529501	0.00144092	0	0.00198807	0.00102249	0.0147764
rs7902257	0.0677083	0.0819672	0.111111	0.0309735	0.146465	0.0411765	0.0972222	0	0	0	0.00961538	0	0	0.0047619	0	0	0.00505051	0	0	0	0	0	0	0	0	0	0.0824508	0.00288184	0.000992063	0.000994036	0	0.0225639
rs79050330	0.00520833	0	0	0.0132743	0	0	0.00925926	0	0	0	0	0	0	0	0	0	0	0	0	0	0	0	0.00970874	0	0	0.00490196	0.00453858	0	0	0	0.00306748	0.00179712
rs79135870	0.015625	0.0327869	0.0151515	0.00442478	0.00505051	0.00588235	0.0324074	0	0	0	0	0	0	0	0	0	0	0	0	0	0	0	0	0	0	0	0.0151286	0	0	0	0	0.00399361
rs7916649	0.682292	0.516393	0.69697	0.672566	0.626263	0.682353	0.699074	0.319149	0.273438	0.117647	0.370192	0.387097	0.446602	0.452381	0.447115	0.378788	0.444444	0.479798	0.450549	0.448598	0.401869	0.581395	0.601942	0.627451	0.609375	0.676471	0.661876	0.276657	0.423611	0.444334	0.620654	0.508786
rs799917	0.838542	0.737705	0.944444	0.911504	0.883838	0.888235	0.925926	0.515957	0.414062	0.4	0.379808	0.5	0.349515	0.37619	0.264423	0.378788	0.363636	0.358586	0.324176	0.359813	0.401869	0.523256	0.509709	0.558824	0.489583	0.563725	0.885023	0.427954	0.371032	0.362823	0.529652	0.54393
rs8050894	0.703125	0.704918	0.787879	0.716814	0.833333	0.658824	0.773148	0.558511	0.492188	0.611765	0.552885	0.177419	0.0436893	0.109524	0.0961538	0.156566	0.565657	0.691919	0.631868	0.621495	0.5	0.843023	0.820388	0.901961	0.802083	0.887255	0.74357	0.557637	0.115079	0.600398	0.851738	0.583666
rs8192709	0.0260417	0.0409836	0.010101	0.0486726	0.0808081	0.0352941	0.0462963	0.0638298	0.015625	0.0176471	0.0625	0.0591398	0.0242718	0.0333333	0.0384615	0.0808081	0.0454545	0.0606061	0.0659341	0.0607477	0.0794393	0.0406977	0.0339806	0.0343137	0.0416667	0.0686275	0.0416036	0.0432277	0.046627	0.0626243	0.0439673	0.047524
rs8192719	0.375	0.352459	0.409091	0.349558	0.363636	0.352941	0.407407	0.367021	0.3125	0.452941	0.346154	0.327957	0.165049	0.161905	0.221154	0.217172	0.287879	0.156566	0.236264	0.205607	0.317757	0.372093	0.407767	0.352941	0.375	0.397059	0.374433	0.371758	0.21627	0.241551	0.381391	0.316893
rs8192784	0.1875	0.122951	0.227273	0.150442	0.207071	0.182353	0.199074	0.0319149	0	0.00588235	0.0625	0.0698925	0.0728155	0.052381	0.0480769	0.0656566	0	0.0151515	0.00549451	0.00934579	0.0233645	0.0116279	0.00970874	0.0294118	0.0885417	0.0392157	0.185325	0.0288184	0.0615079	0.0109344	0.0357873	0.0744808
rs8192789	0.192708	0.122951	0.222222	0.150442	0.222222	0.182353	0.199074	0.0319149	0	0.00588235	0.0625	0.0752688	0.0728155	0.052381	0.0480769	0.0656566	0	0.0151515	0.00549451	0.00934579	0.0233645	0.0116279	0.00970874	0.0294118	0.0885417	0.0343137	0.187595	0.0288184	0.0625	0.0109344	0.0347648	0.0750799
rs8330	0.442708	0.401639	0.510101	0.50885	0.343434	0.364706	0.458333	0.218085	0.203125	0.217647	0.25	0.107527	0.11165	0.142857	0.129808	0.161616	0.217172	0.136364	0.230769	0.299065	0.28972	0.156977	0.184466	0.20098	0.182292	0.151961	0.437973	0.224784	0.130952	0.236581	0.175869	0.254992
rs873478	0	0	0	0	0	0	0	0	0.0078125	0	0	0.102151	0.0339806	0.0714286	0.0192308	0.0454545	0	0	0	0	0	0	0	0	0	0	0	0.00144092	0.0535714	0	0	0.0109824
rs886113	0.921875	0.827869	0.974747	0.964602	0.939394	0.952941	0.981481	0.388298	0.304688	0.252941	0.466346	0.478495	0.509709	0.519048	0.5	0.494949	0.40404	0.30303	0.32967	0.397196	0.359813	0.5	0.461165	0.470588	0.432292	0.514706	0.944781	0.363112	0.500992	0.359841	0.47546	0.565695
rs887829	0.484375	0.459016	0.459596	0.49115	0.530303	0.488235	0.523148	0.340426	0.367188	0.452941	0.360577	0.155914	0.11165	0.114286	0.177885	0.0909091	0.318182	0.358586	0.263736	0.280374	0.271028	0.418605	0.441748	0.406863	0.447917	0.465686	0.493192	0.378963	0.12996	0.298211	0.436605	0.354034
rs921451	0.255208	0.204918	0.222222	0.230088	0.191919	0.135294	0.175926	0.244681	0.21875	0.217647	0.288462	0.462366	0.509709	0.447619	0.456731	0.459596	0.338384	0.479798	0.406593	0.266355	0.317757	0.534884	0.432039	0.490196	0.442708	0.480392	0.20348	0.246398	0.467262	0.358847	0.474438	0.346645
rs9332131	0.00520833	0	0.020202	0.00884956	0	0	0.0185185	0	0	0	0	0	0	0	0	0	0	0	0	0	0	0	0	0	0	0	0.00832073	0	0	0	0	0.00219649
rs9332239	0	0	0	0	0	0	0	0	0	0	0.00480769	0	0	0	0	0	0.00505051	0	0	0	0.00934579	0	0	0	0	0	0	0.00144092	0	0.00298211	0	0.000798722
rs9395206	0.046875	0.0655738	0.0353535	0.0176991	0.030303	0.0647059	0.0462963	0.12766	0.164062	0.152941	0.129808	0.0537634	0.131068	0.0857143	0.110577	0.0656566	0.19697	0.257576	0.203297	0.28972	0.252336	0.0872093	0.145631	0.0980392	0.104167	0.112745	0.0416036	0.14121	0.0902778	0.241551	0.110429	0.11881
rs9825294	0.354167	0.196721	0.338384	0.252212	0.292929	0.329412	0.319444	0.0531915	0.046875	0.170588	0.0673077	0.301075	0.296117	0.338095	0.153846	0.368687	0	0.040404	0	0.0140187	0	0.0232558	0.00970874	0.0294118	0.0625	0.0147059	0.301815	0.0850144	0.290675	0.0109344	0.0276074	0.157548
rs9831234	0.5	0.434426	0.515152	0.522124	0.40404	0.5	0.435185	0.25	0.195312	0.2	0.302885	0.166667	0.0679612	0.0857143	0.0865385	0.126263	0.141414	0.10101	0.186813	0.238318	0.257009	0.209302	0.286408	0.29902	0.28125	0.220588	0.475038	0.243516	0.105159	0.186879	0.260736	0.26877
rs9859552	0.0260417	0.0409836	0	0	0.0252525	0	0	0.106383	0.09375	0.0705882	0.177885	0	0	0.0047619	0	0.00505051	0.176768	0.141414	0.175824	0.149533	0.224299	0.00581395	0.0145631	0.0343137	0.0520833	0.0882353	0.0113464	0.116715	0.00198413	0.173956	0.0398773	0.0623003
rs9931588	0.630208	0.557377	0.717172	0.615044	0.69697	0.594118	0.74537	0.255319	0.210938	0.111765	0.298077	0.177419	0.300971	0.271429	0.298077	0.181818	0.30303	0.292929	0.21978	0.261682	0.196262	0.215116	0.228155	0.264706	0.208333	0.230392	0.658094	0.224784	0.248016	0.254473	0.230061	0.350839
rs9934438	0.9375	0.852459	0.974747	0.933628	0.964646	0.947059	0.972222	0.579787	0.53125	0.611765	0.610577	0.177419	0.0436893	0.109524	0.0961538	0.156566	0.570707	0.691919	0.642857	0.640187	0.523364	0.843023	0.825243	0.906863	0.802083	0.892157	0.945537	0.587896	0.115079	0.612326	0.854806	0.644169

## Sheet: Table E
Table 5: 1000 Genomes Project population desctiption (http://www.internationalgenome.org/)
Population code	Population name	Population description	Superpopulation code	# of individuals
TSI	Tuscan	Toscani in Italy	EUR	107
IBS	Spanish	Iberian populations in Spain	EUR	107
GWD	Gambian	Gambian in Western Division, The Gambia	AFR	113
MSL	Mende	Mende in Sierra Leone	AFR	85
ESN	Esan	Esan in Nigeria	AFR	99
MXL	Mexican-American	Mexican Ancestry in Los Angeles, California	AMR	64
CLM	Colombian	Colombian in Medellin, Colombia	AMR	94
PJL	Punjabi	Punjabi in Lahore, Pakistan	SAS	96
PEL	Peruvian	Peruvian in Lima, Peru	AMR	85
YRI	Yoruba	Yoruba in Ibadan, Nigeria	AFR	108
LWK	Luhya	Luhya in Webuye, Kenya	AFR	99
STU	Sri Lankan	Sri Lankan Tamil in the UK	SAS	102
ITU	Indian	Indian Telugu in the UK	SAS	102
GBR	British	British in England and Scotland	EUR	91
CEU	CEPH	Utah residents (CEPH) with Northern and Western European ancestry	EUR	99
ACB	African-Caribbean	African Caribbean in Barbados	AFR	96
PUR	Puerto Rican	Puerto Rican in Puerto Rico	AMR	104
CHS	Southern Han Chinese	Han Chinese South	EAS	105
KHV	Kinh Vietnamese	Kinh in Ho Chi Minh City, Vietnam	EAS	99
FIN	Finnish	Finnish in Finland	EUR	99
ASW	African-American SW	African Ancestry in Southwest US	AFR	61
BEB	Bengali	Bengali in Bangladesh	SAS	86
CHB	Han Chinese	Han Chinese in Beijing, China	EAS	103
JPT	Japanese	Japanese in Tokyo, Japan	EAS	104
CDX	Dai Chinese	Chinese Dai in Xishuangbanna, China	EAS	93
GIH	Gujarati	Gujarati Indian in Houston, TX	SAS	103
